# Supplementary material for: Structure–Activity Relationships and Biological Evaluation of 7-Substituted Harmine Analogs for Human β-Cell Proliferation
Source: PubMed Central journal article supplement (PMC7221803; doi:10.3390/molecules25081983), 2020-04-23

# <sup>1</sup>H-NMR of Compound 1-1

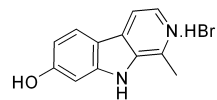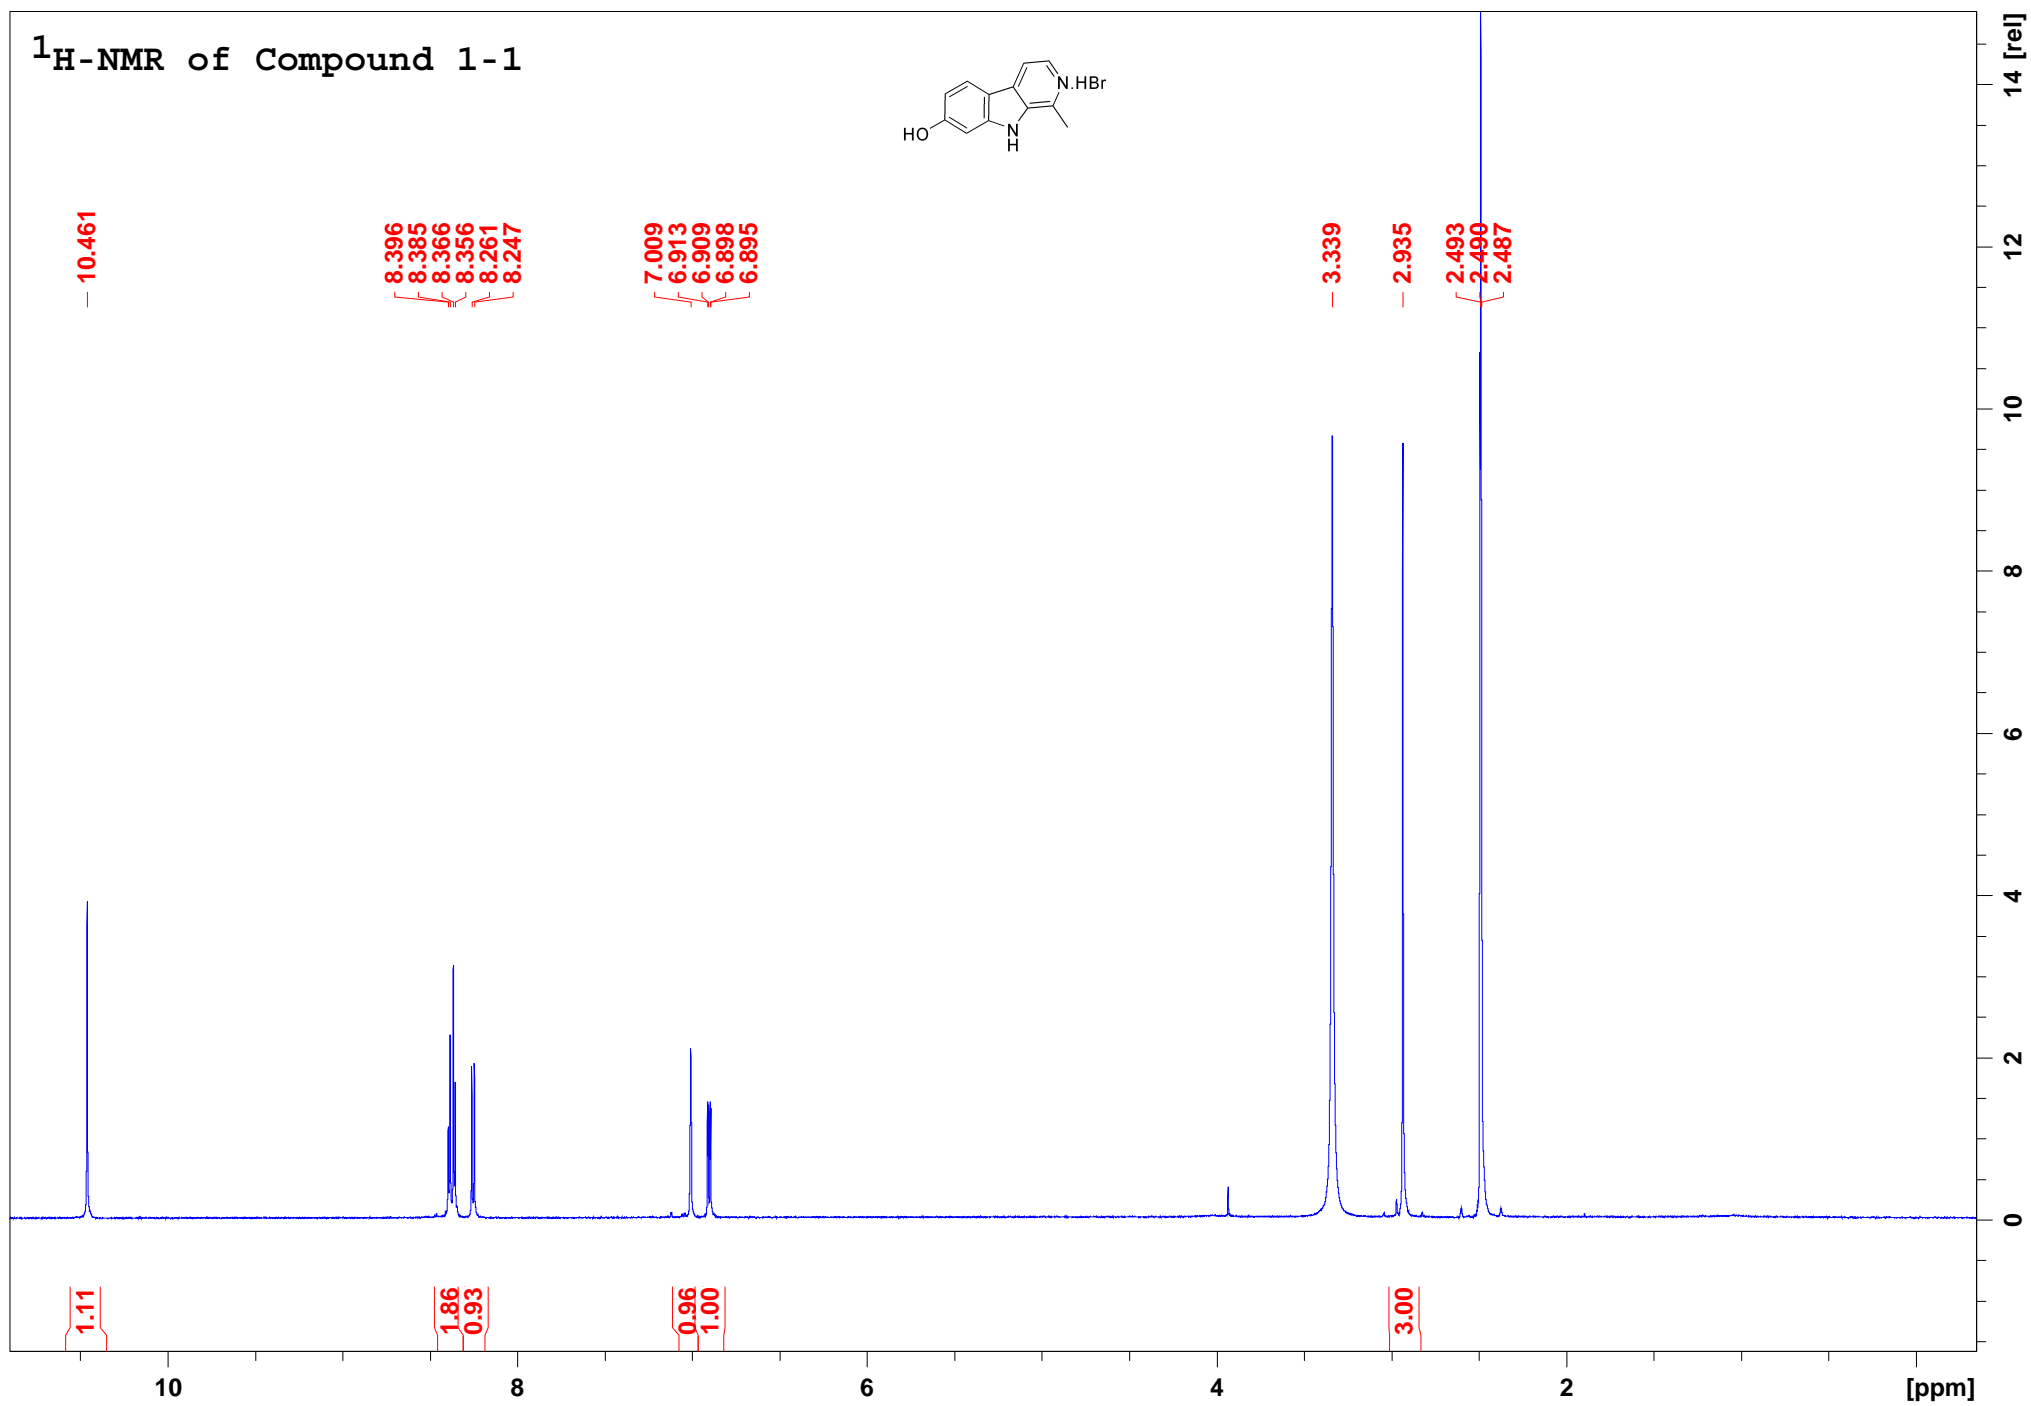

<sup>1</sup>H-NMR of Compound 1-2a

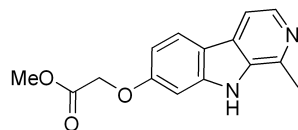

8.085  
8.076  
7.978  
7.963  
7.774  
7.765

6.971  
6.967  
6.890  
6.886  
6.875  
6.872

4.910  
4.792

3.804

3.313  
3.310  
3.308

2.735

0.88  
0.82  
0.91

0.84  
0.80

1.61

2.22

3.20

8

6

4

2

[ppm]

[rel]

30

20

10

0

<sup>1</sup>H-NMR of Compound 1-2b

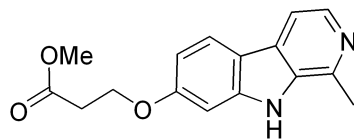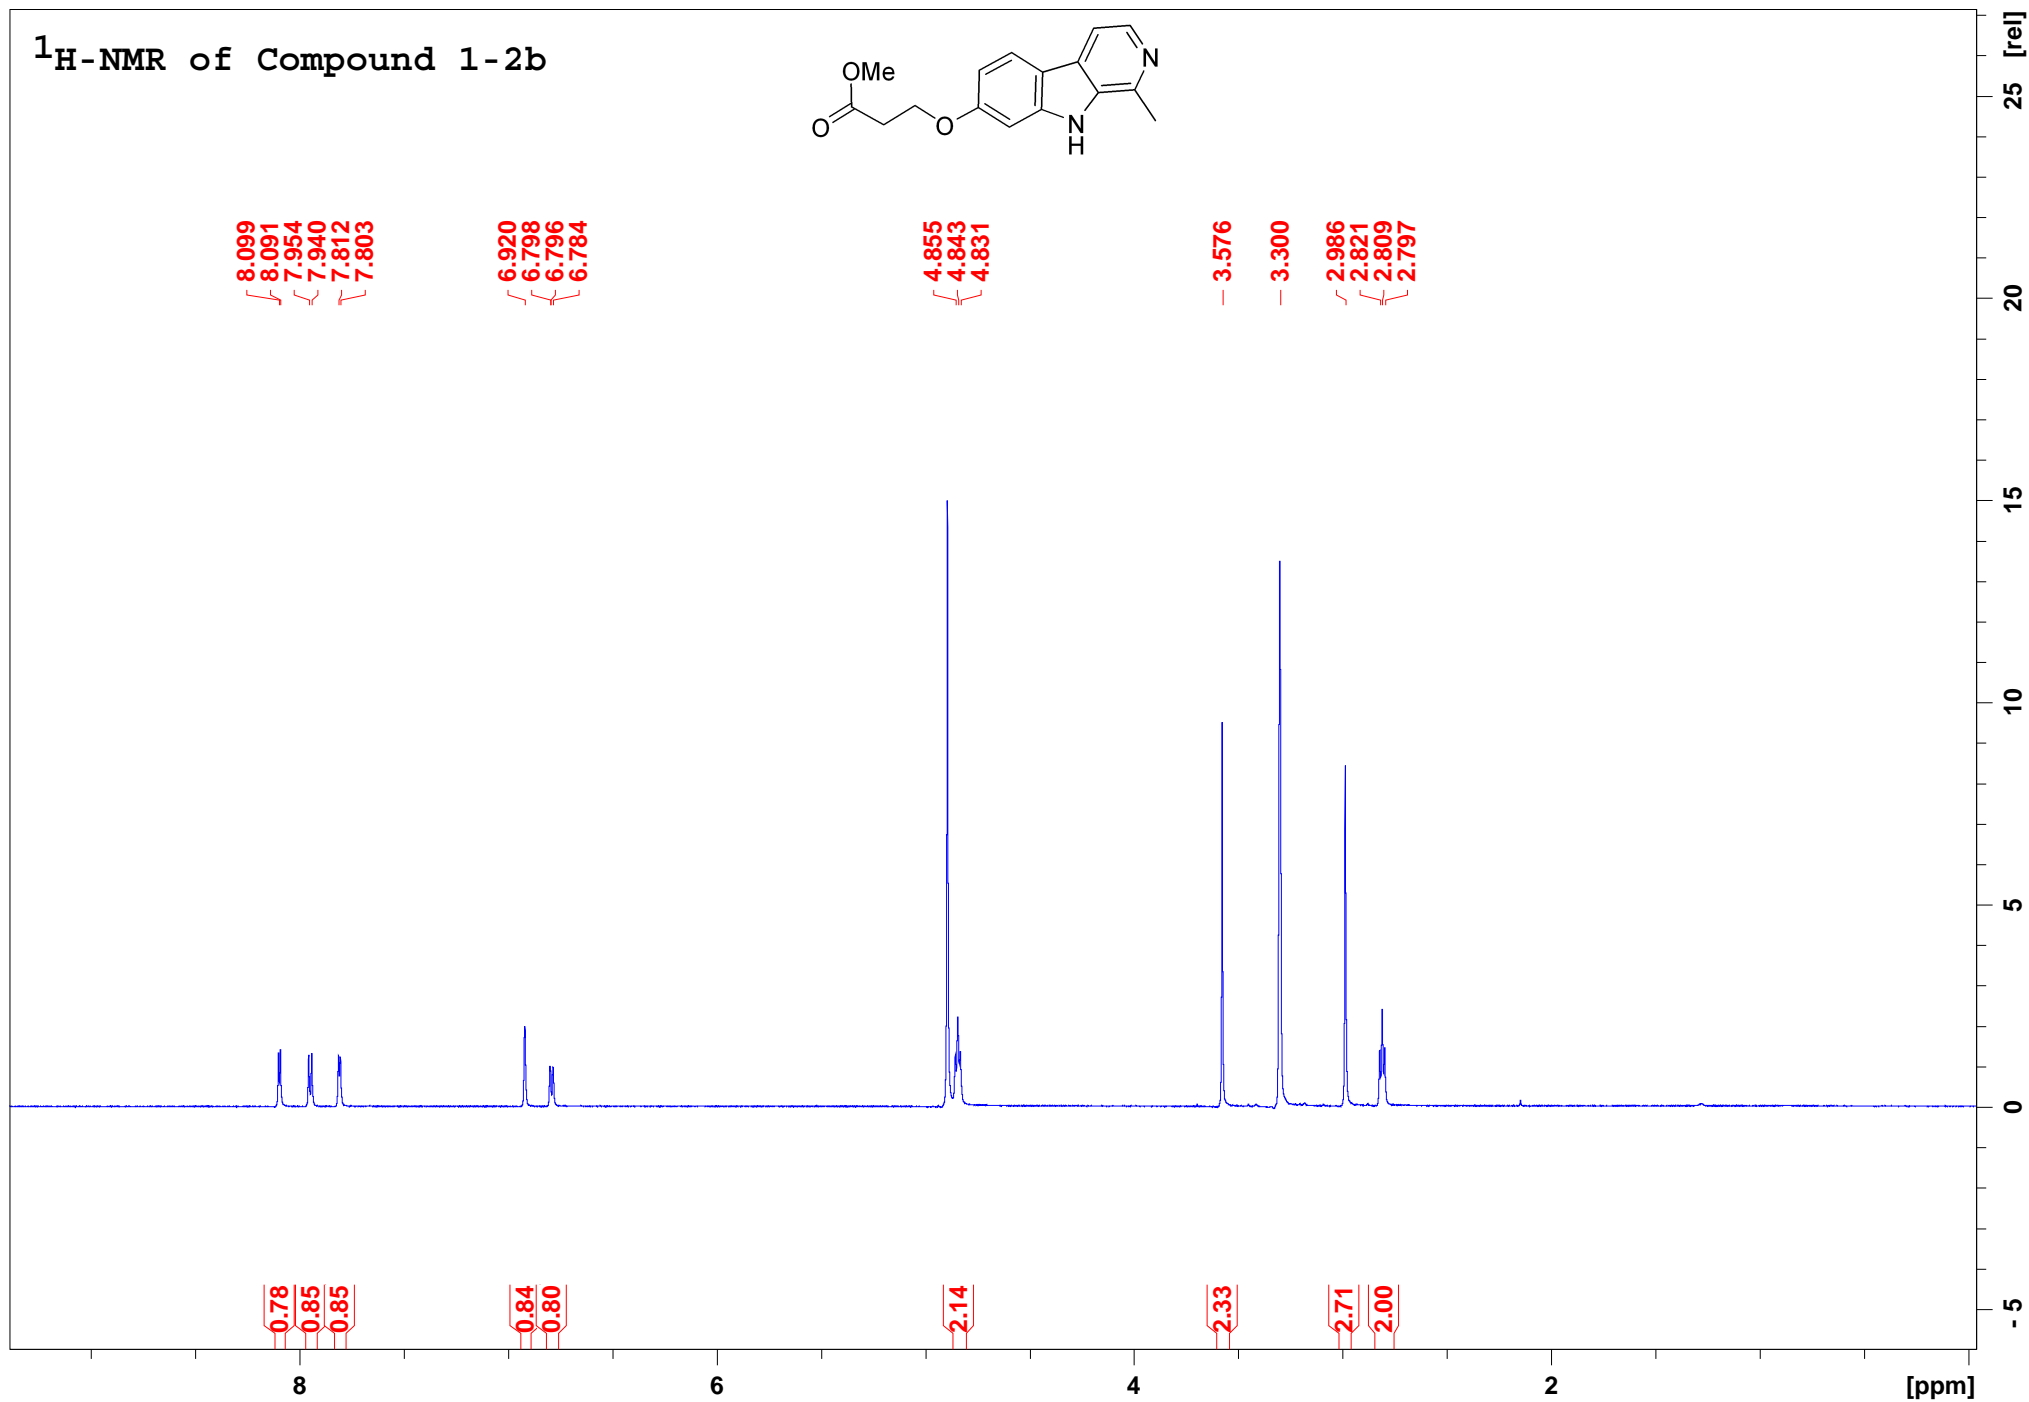

# <sup>1</sup>H-NMR of Compound 1-2c

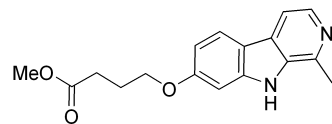

8.094  
8.085  
7.986  
7.972  
7.795  
7.786

7.024  
6.860  
6.845

4.894

4.129  
4.119  
4.109

3.684

3.300

2.756  
2.581  
2.569  
2.557

2.148  
2.137  
2.126

0.79  
0.84  
0.84

0.85  
0.86

2.00

2.33

2.60  
1.85

1.97

[ppm]

[rel]

30

20

10

0

# <sup>1</sup>H-NMR of Compound 1-2d

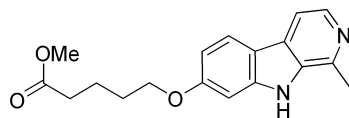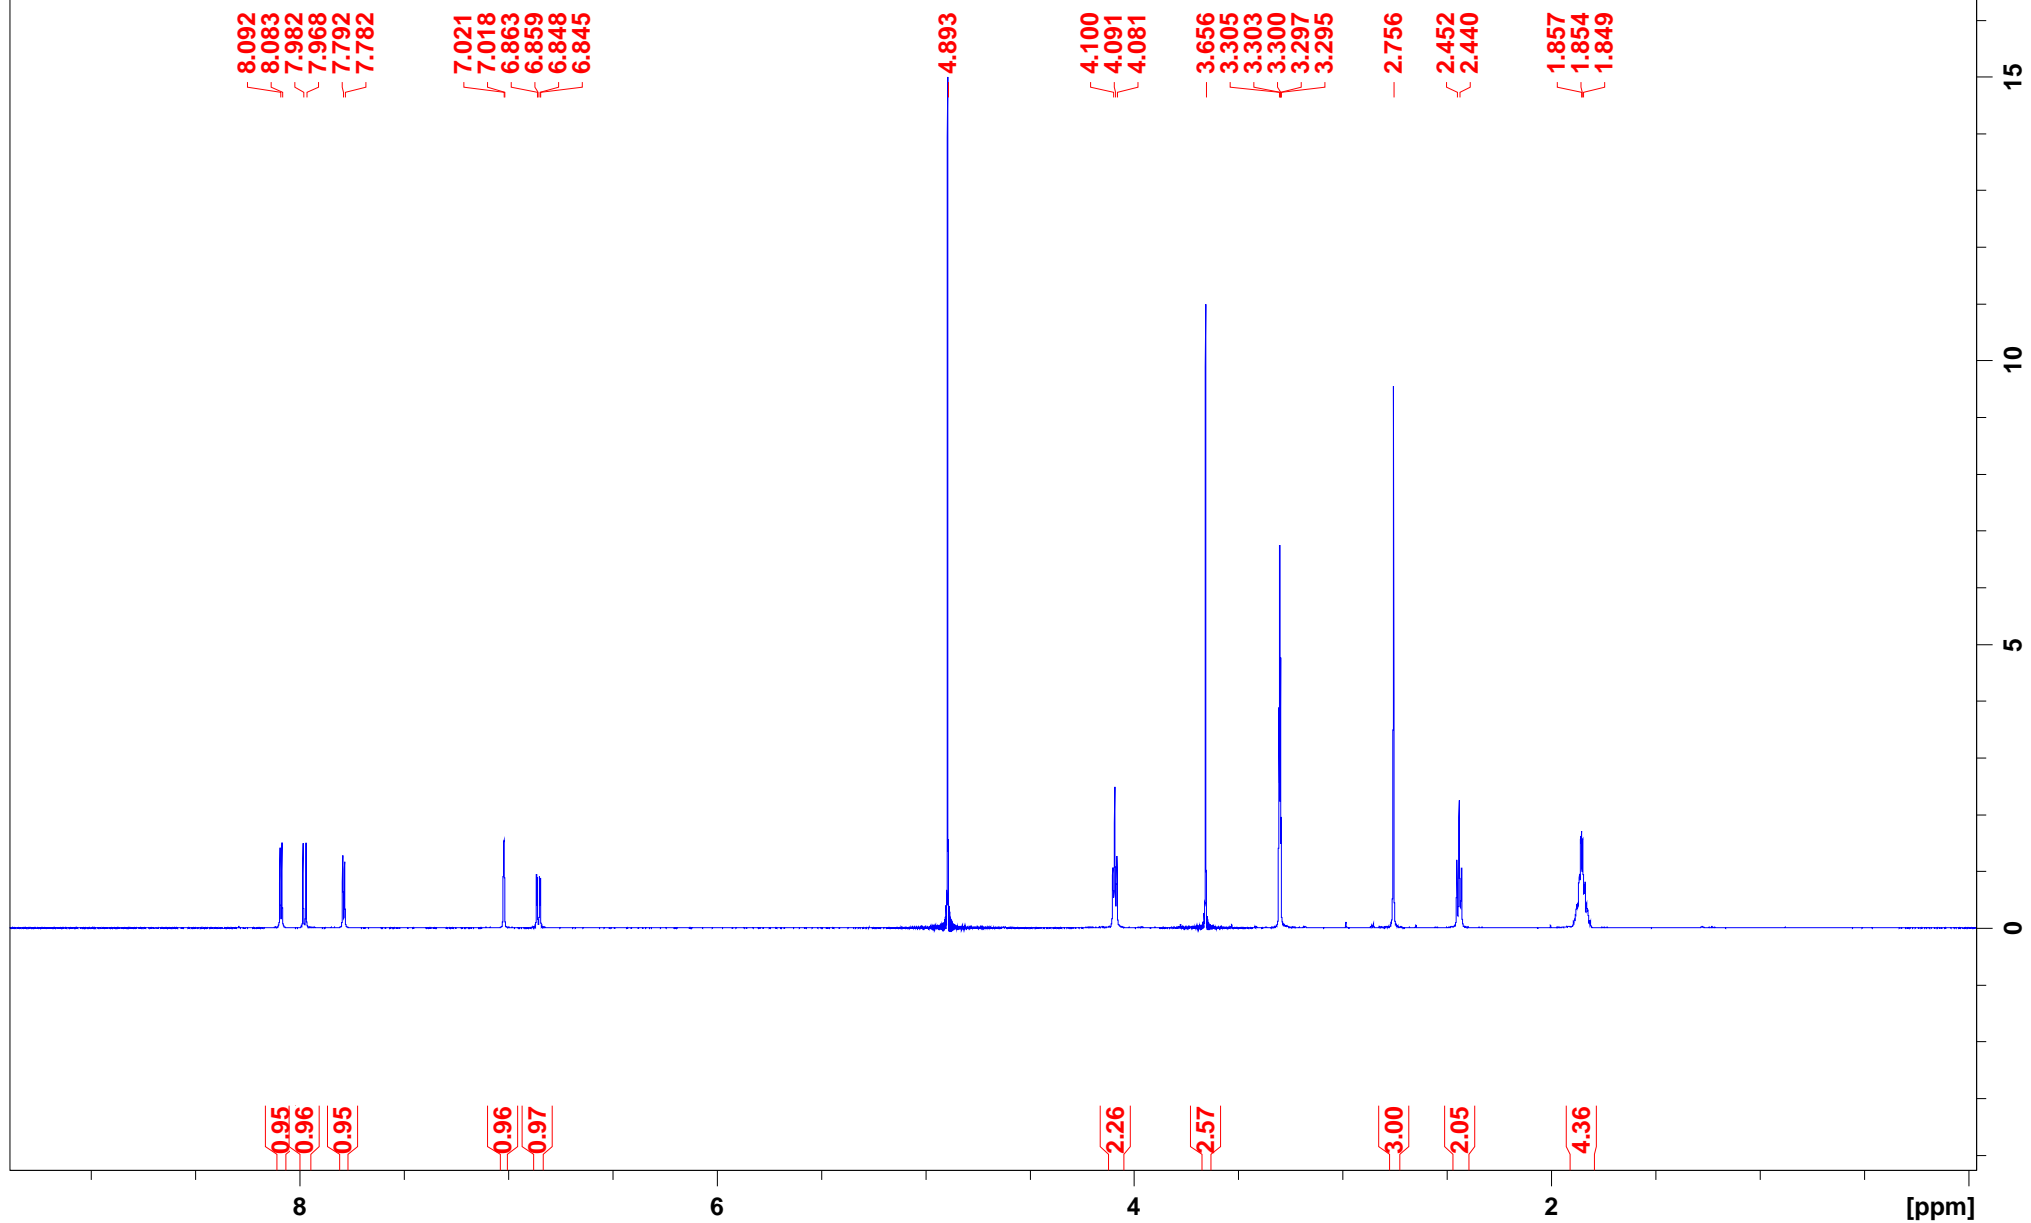

# <sup>1</sup>H-NMR of Compound 1-2e

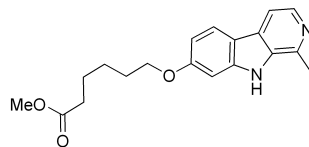

8.088  
8.079  
7.971  
7.956  
7.783  
7.774

7.009  
7.006  
6.852  
6.848  
6.837  
6.834

4.891

4.078  
4.067  
4.057

3.650

3.303  
3.300  
3.297

2.751

2.385  
2.373  
2.360

1.855  
1.842  
1.829  
1.718

1.705  
1.692  
1.554  
1.542

1.528

1.00  
0.88  
0.88

0.89  
0.90

2.14

2.34

3.00

1.91

2.08  
2.04  
2.07

[ppm]

[rel]

<sup>1</sup>H-NMR of Compound 1-2f

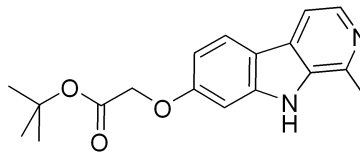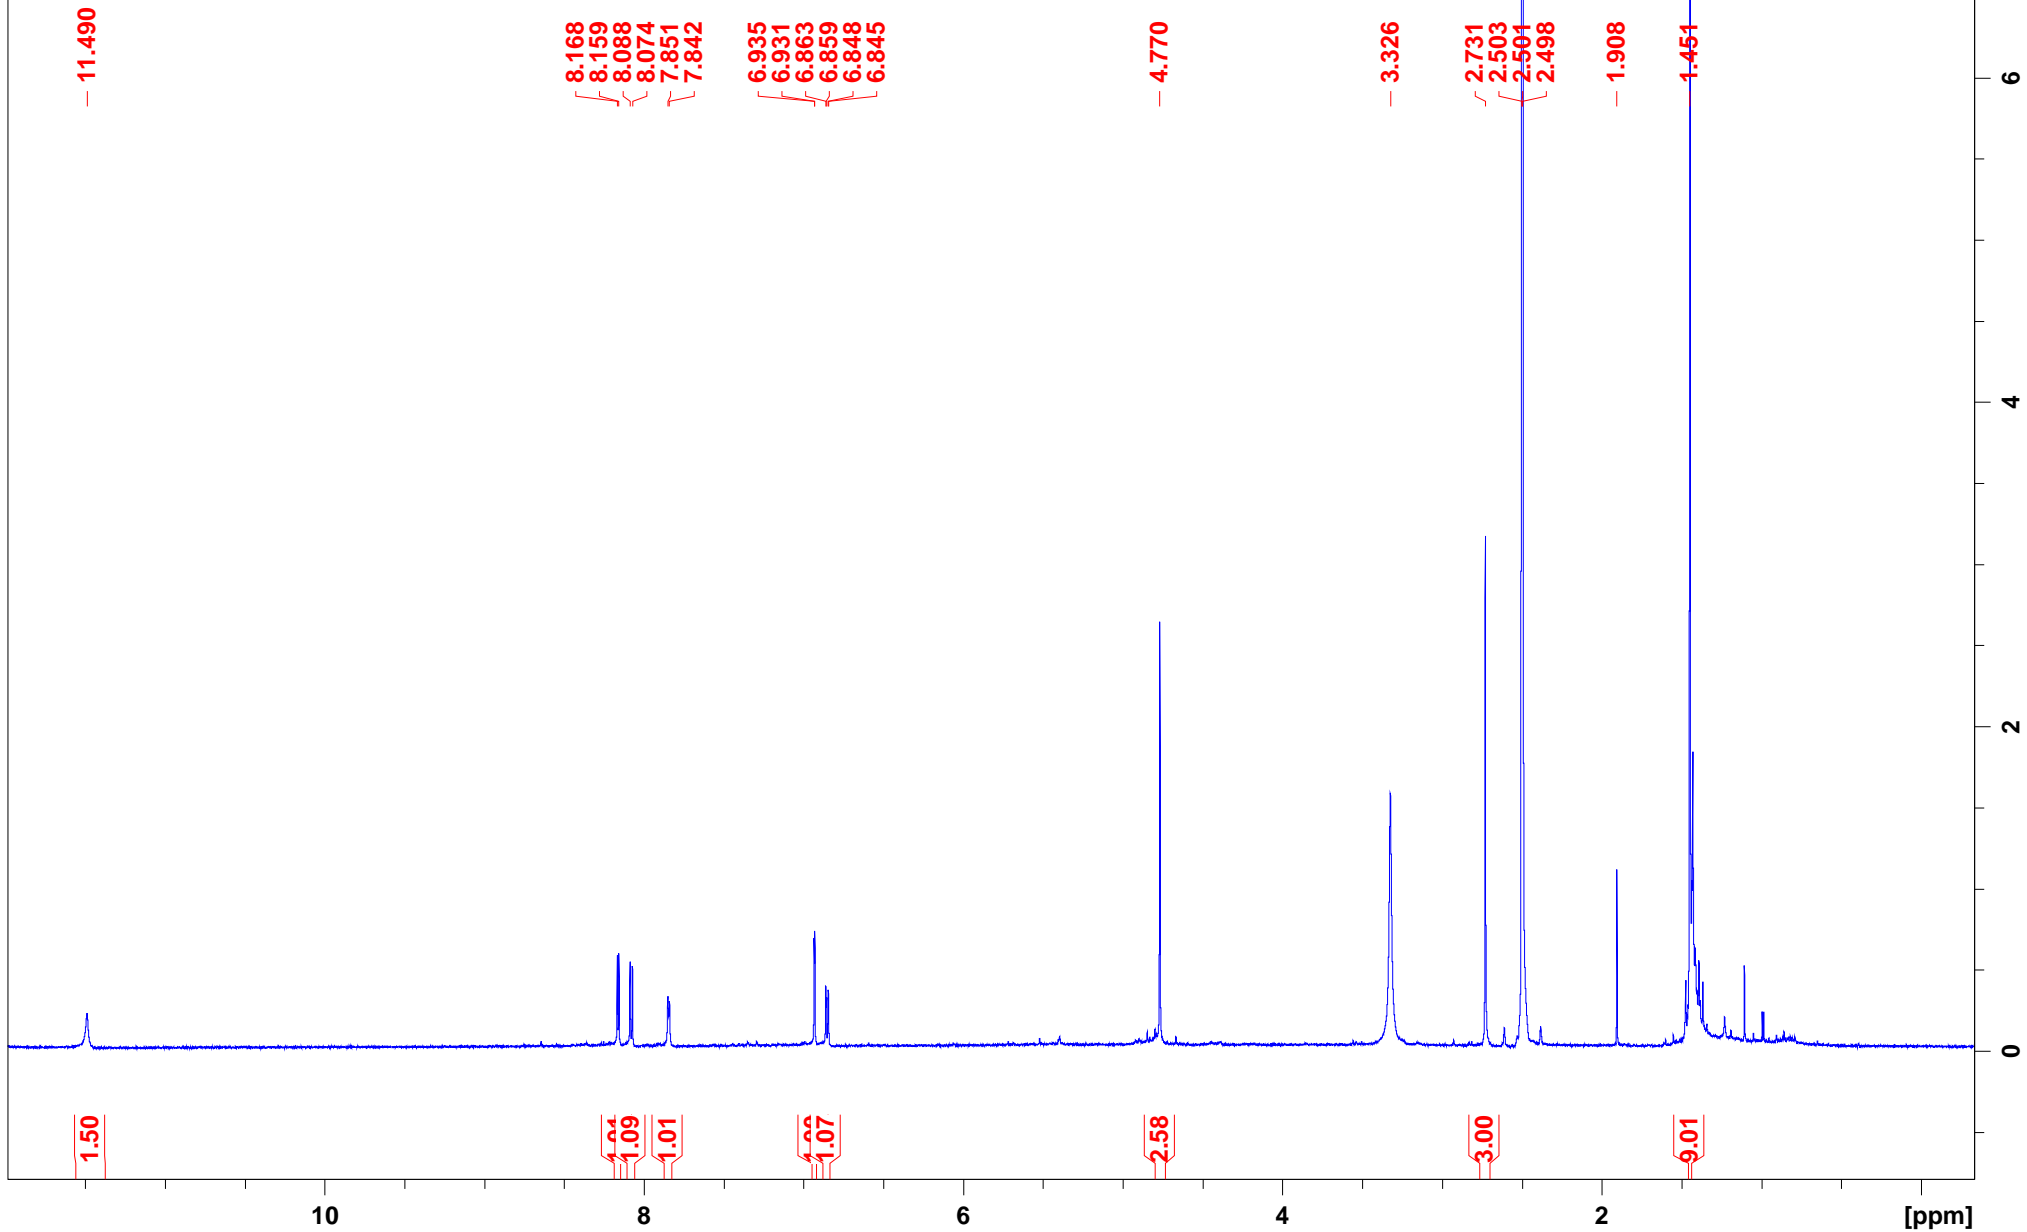

<sup>1</sup>H-NMR of Compound 1-2g

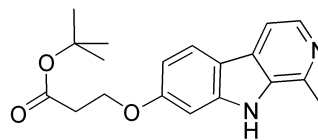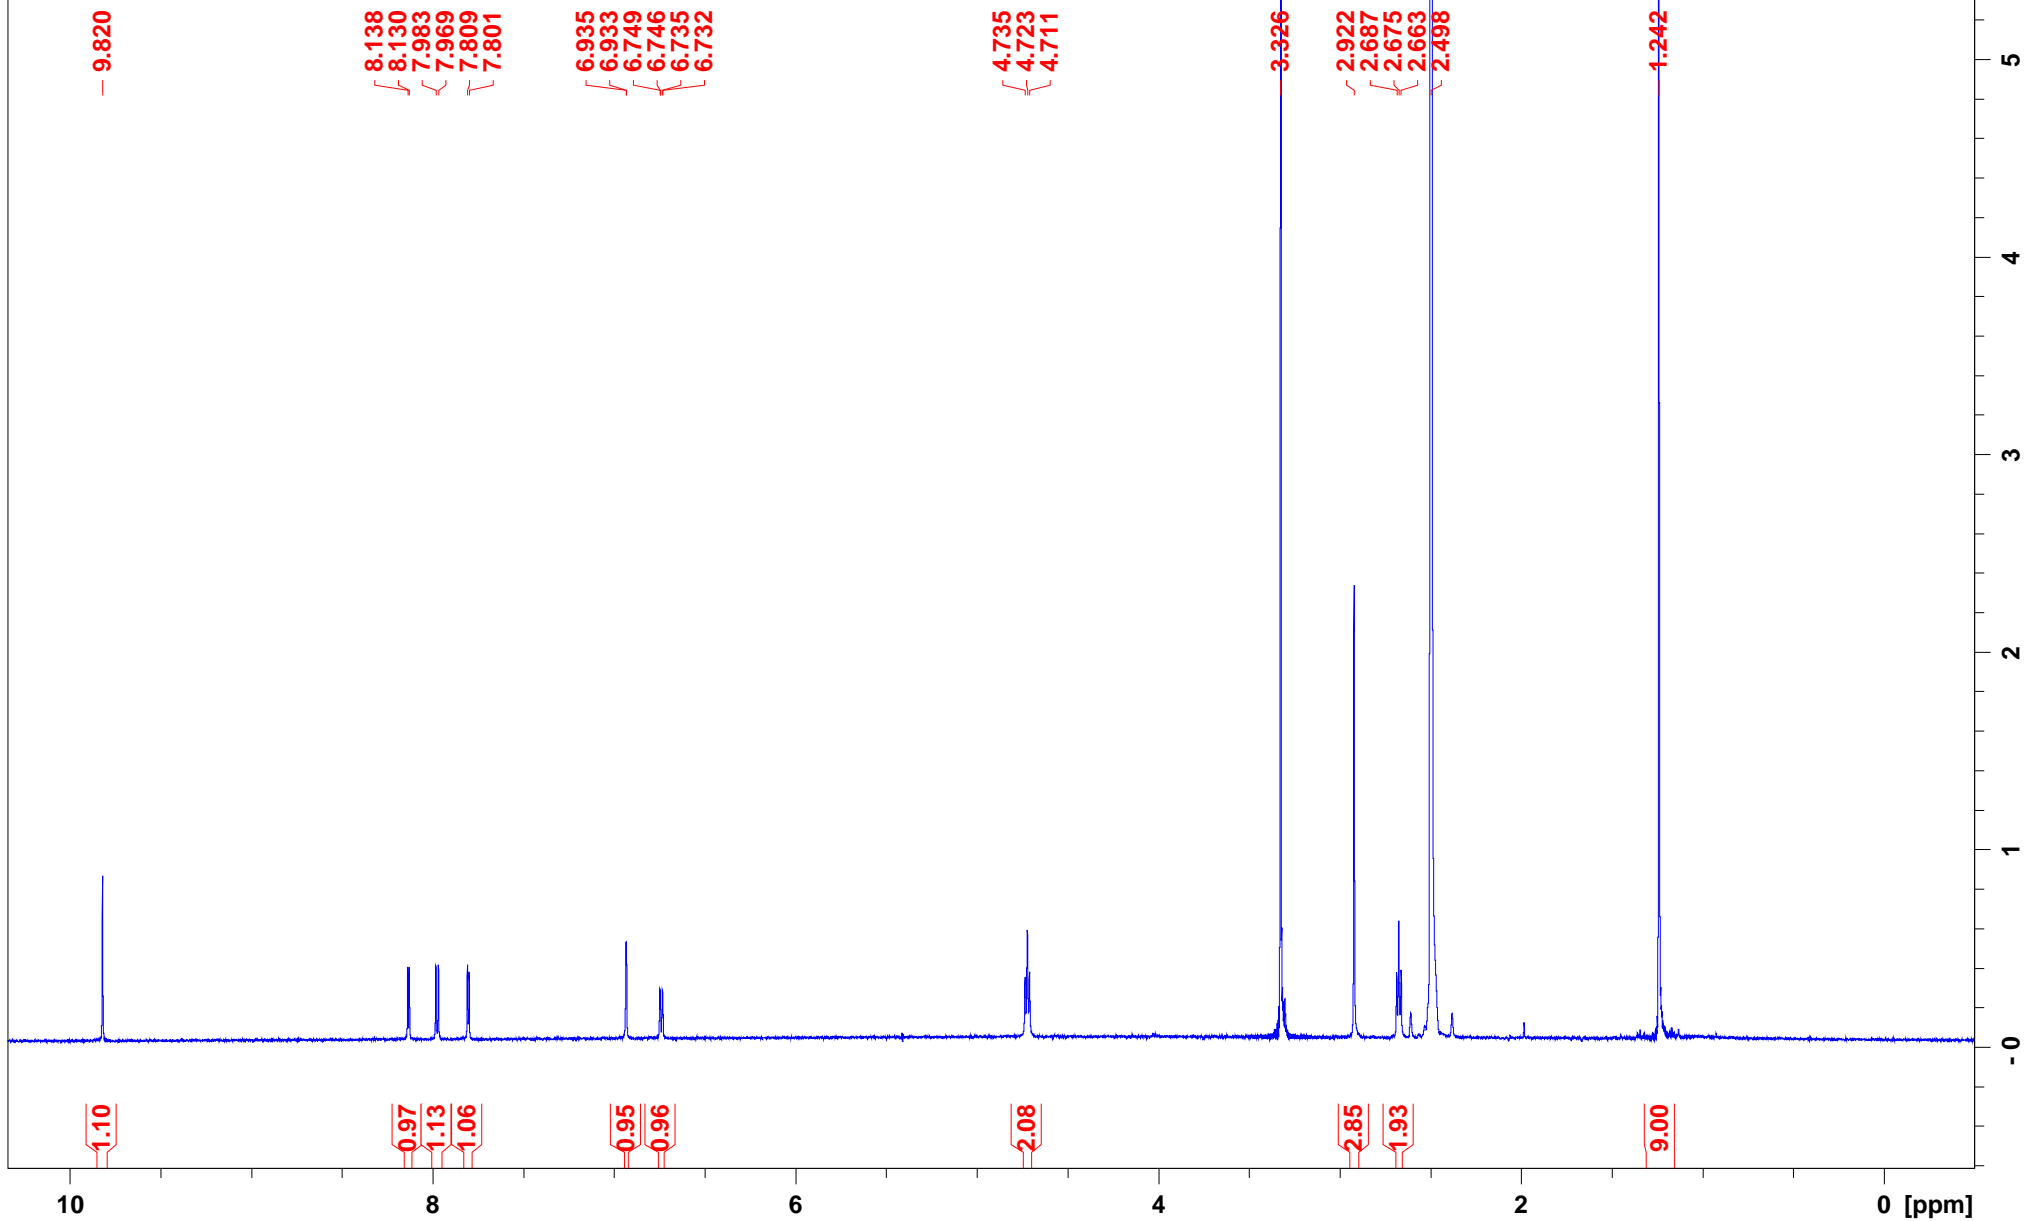



<sup>1</sup>H-NMR of Compound 1-2h

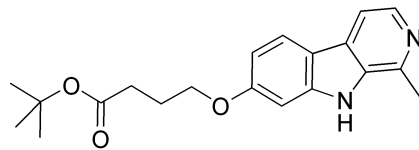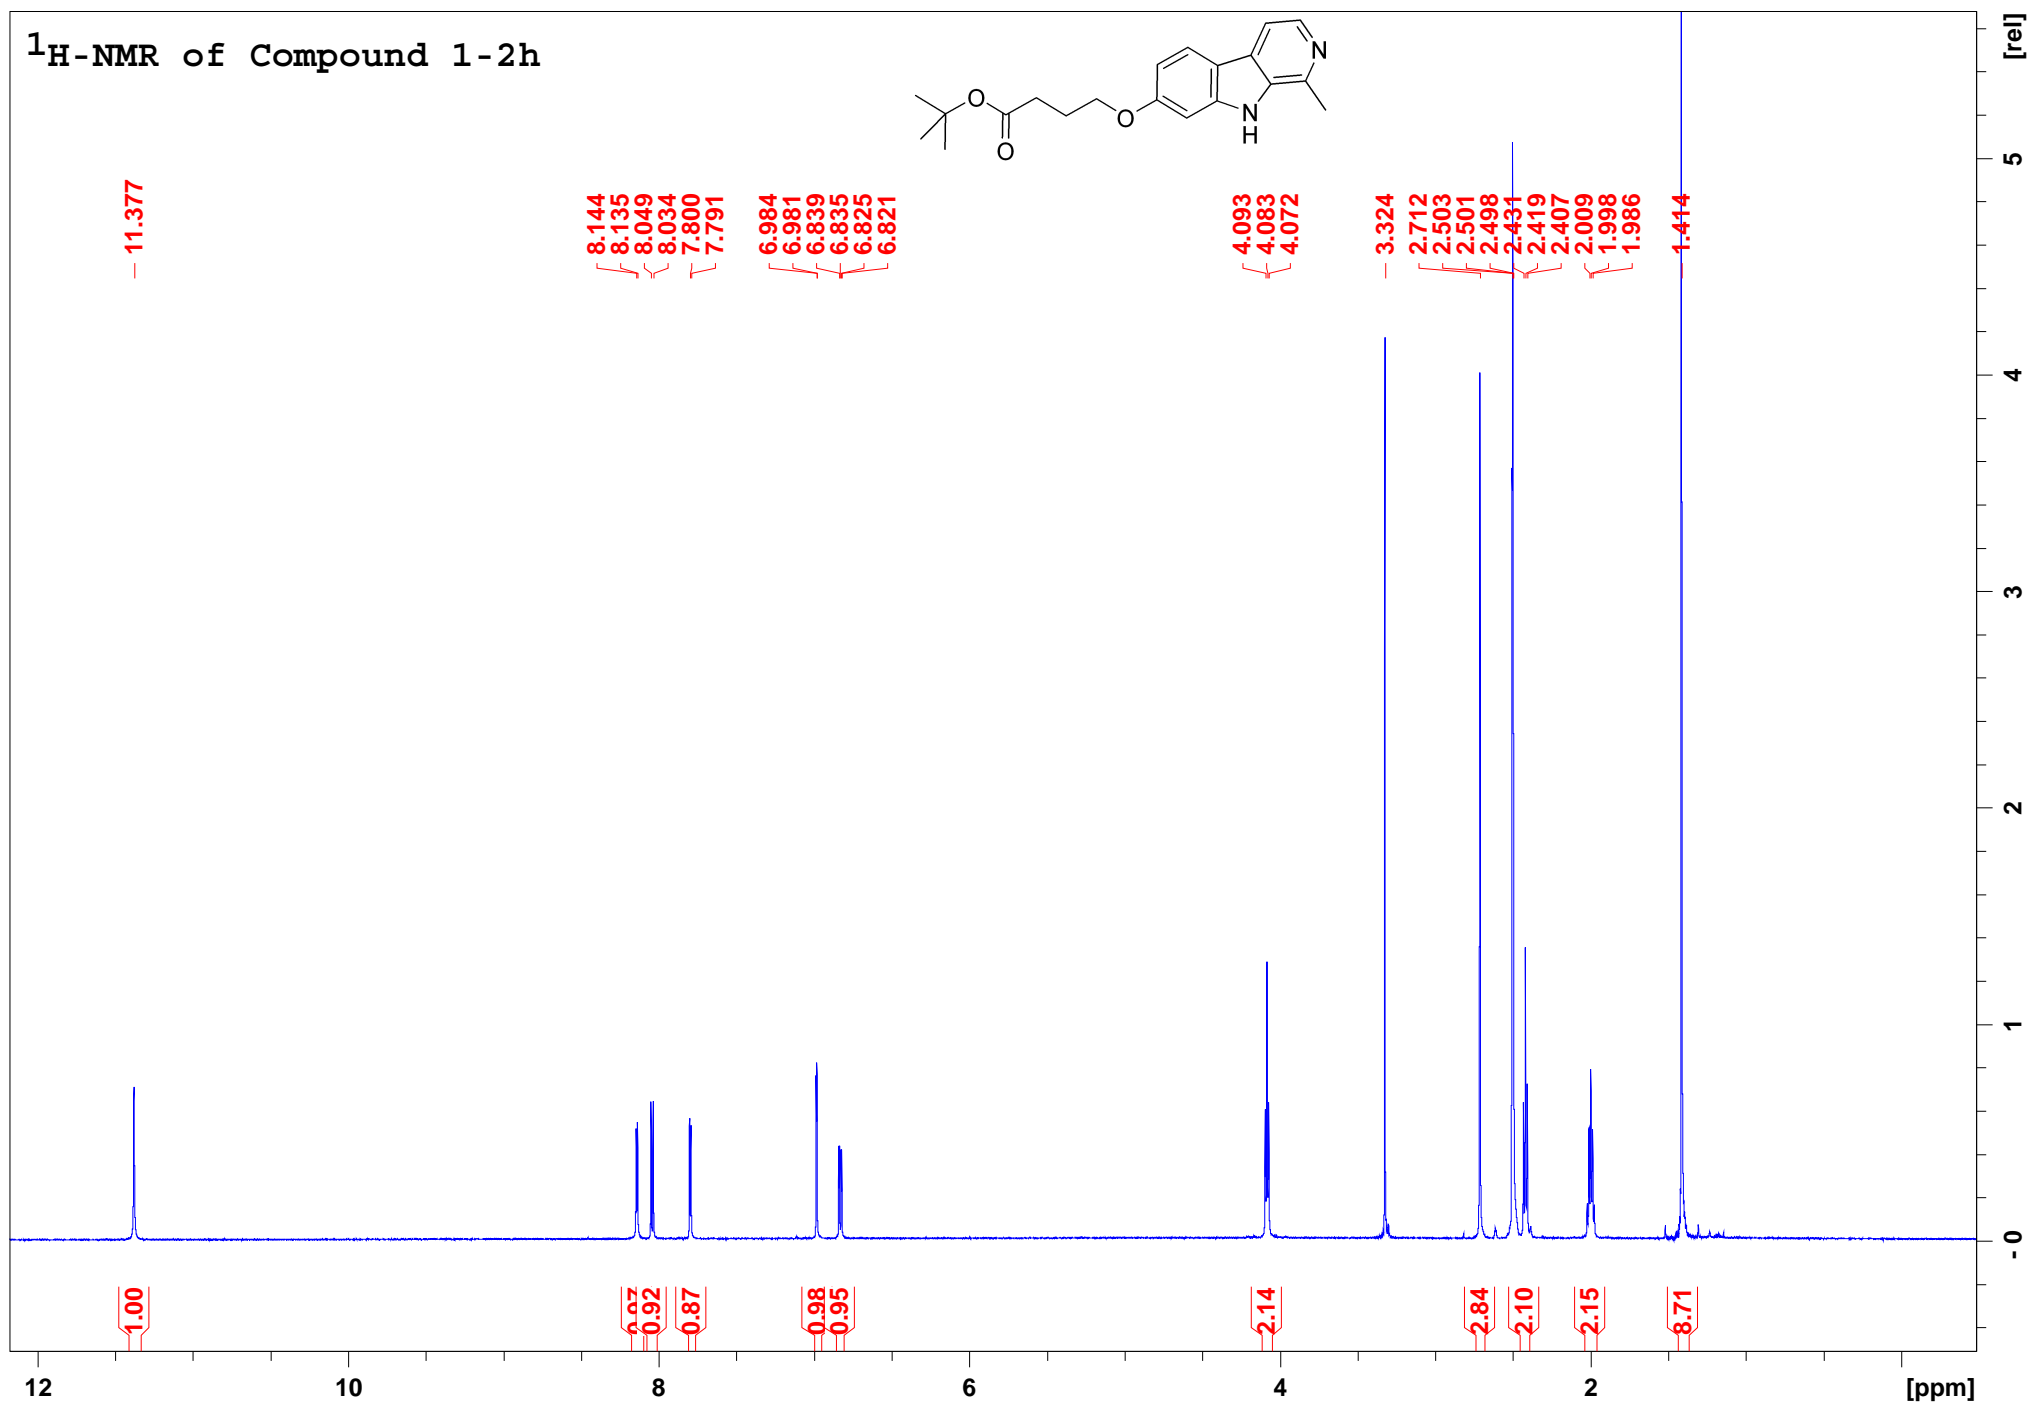

# <sup>1</sup>H-NMR of Compound 1-2i

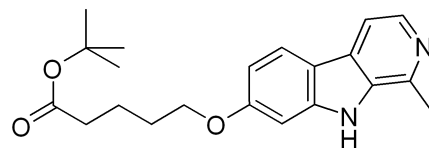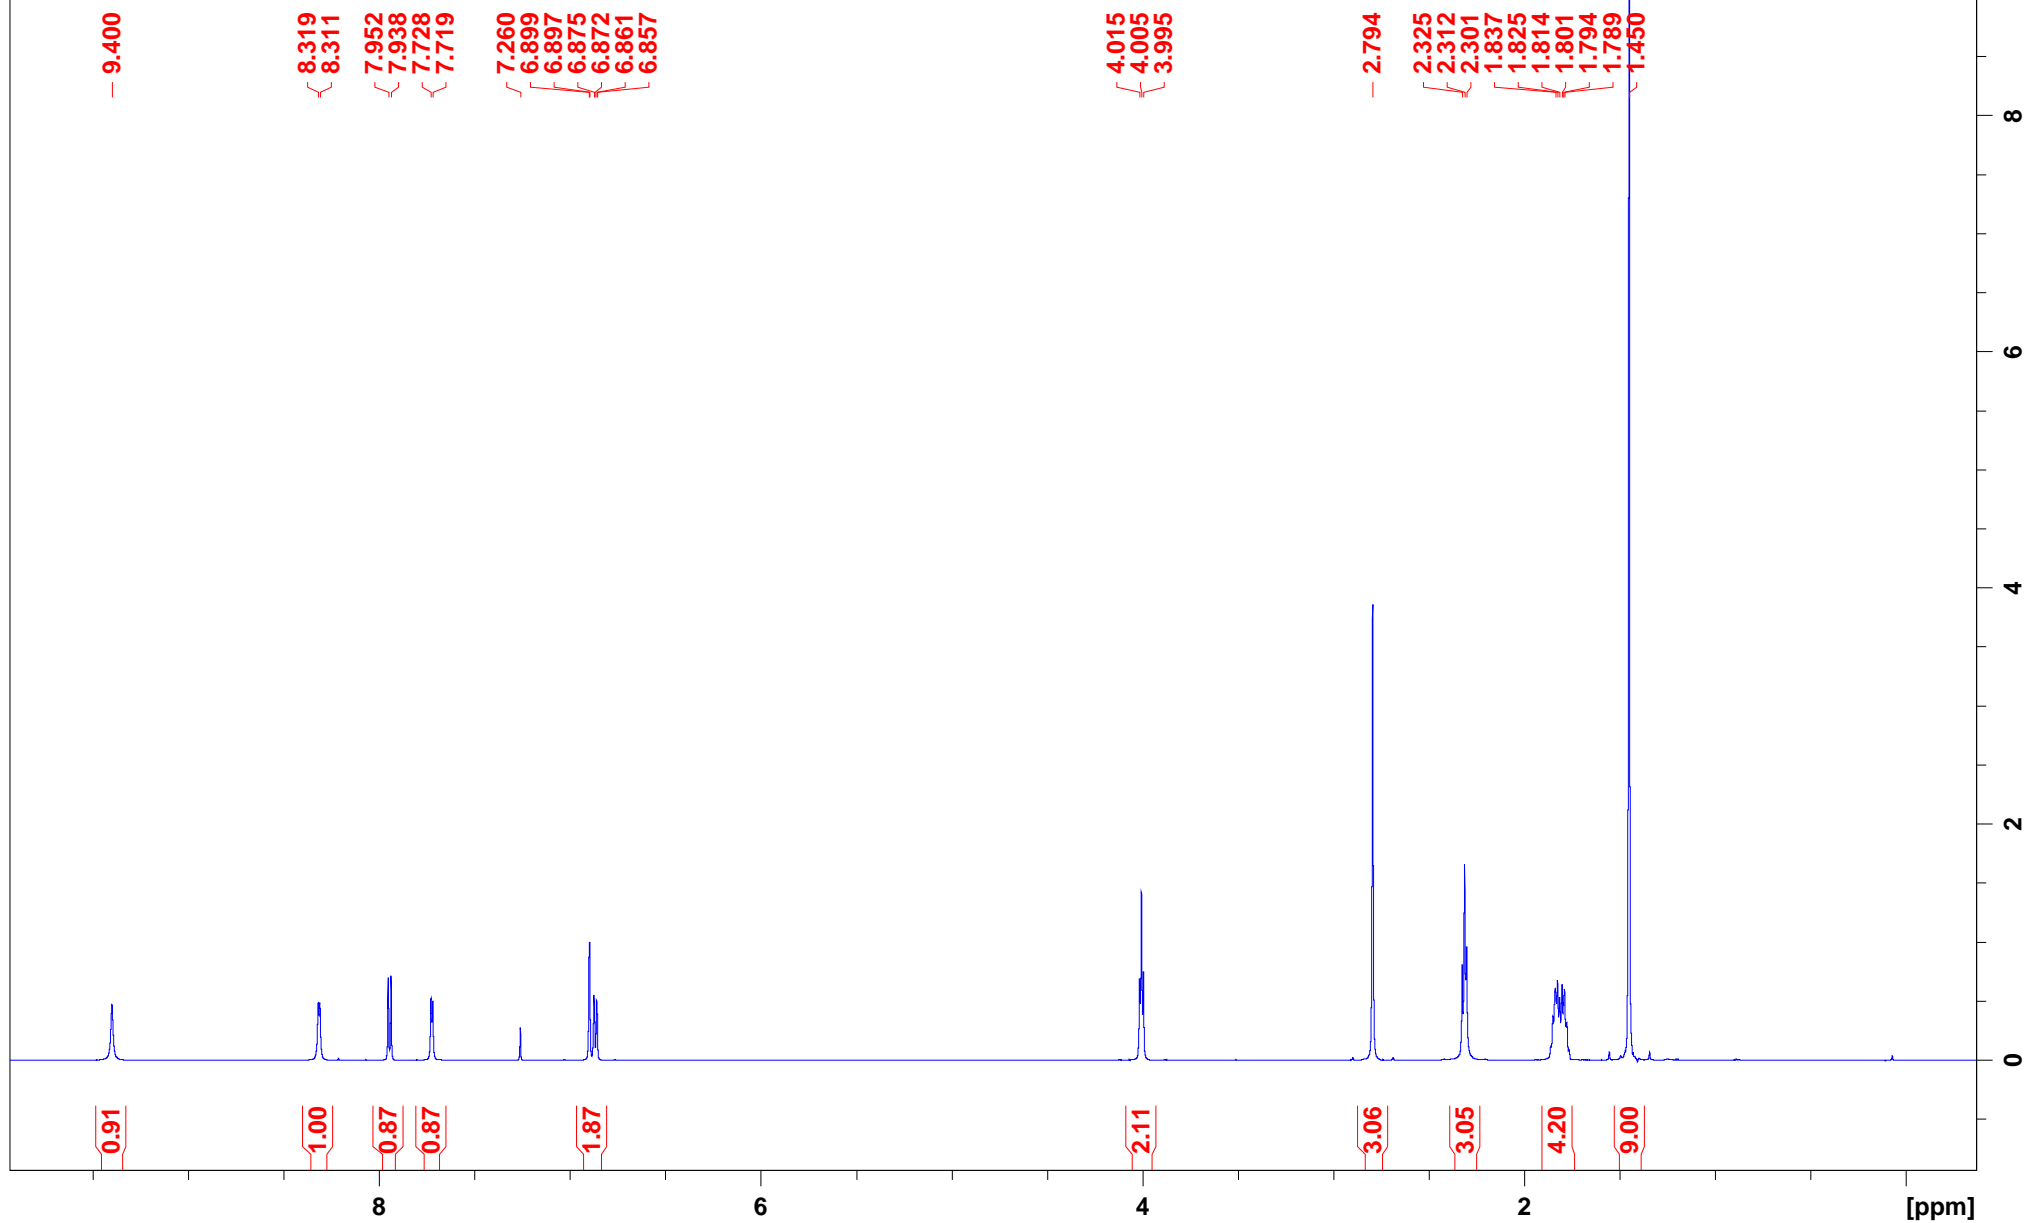

<sup>1</sup>H-NMR of Compound 1-2j

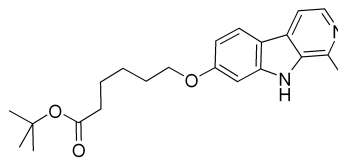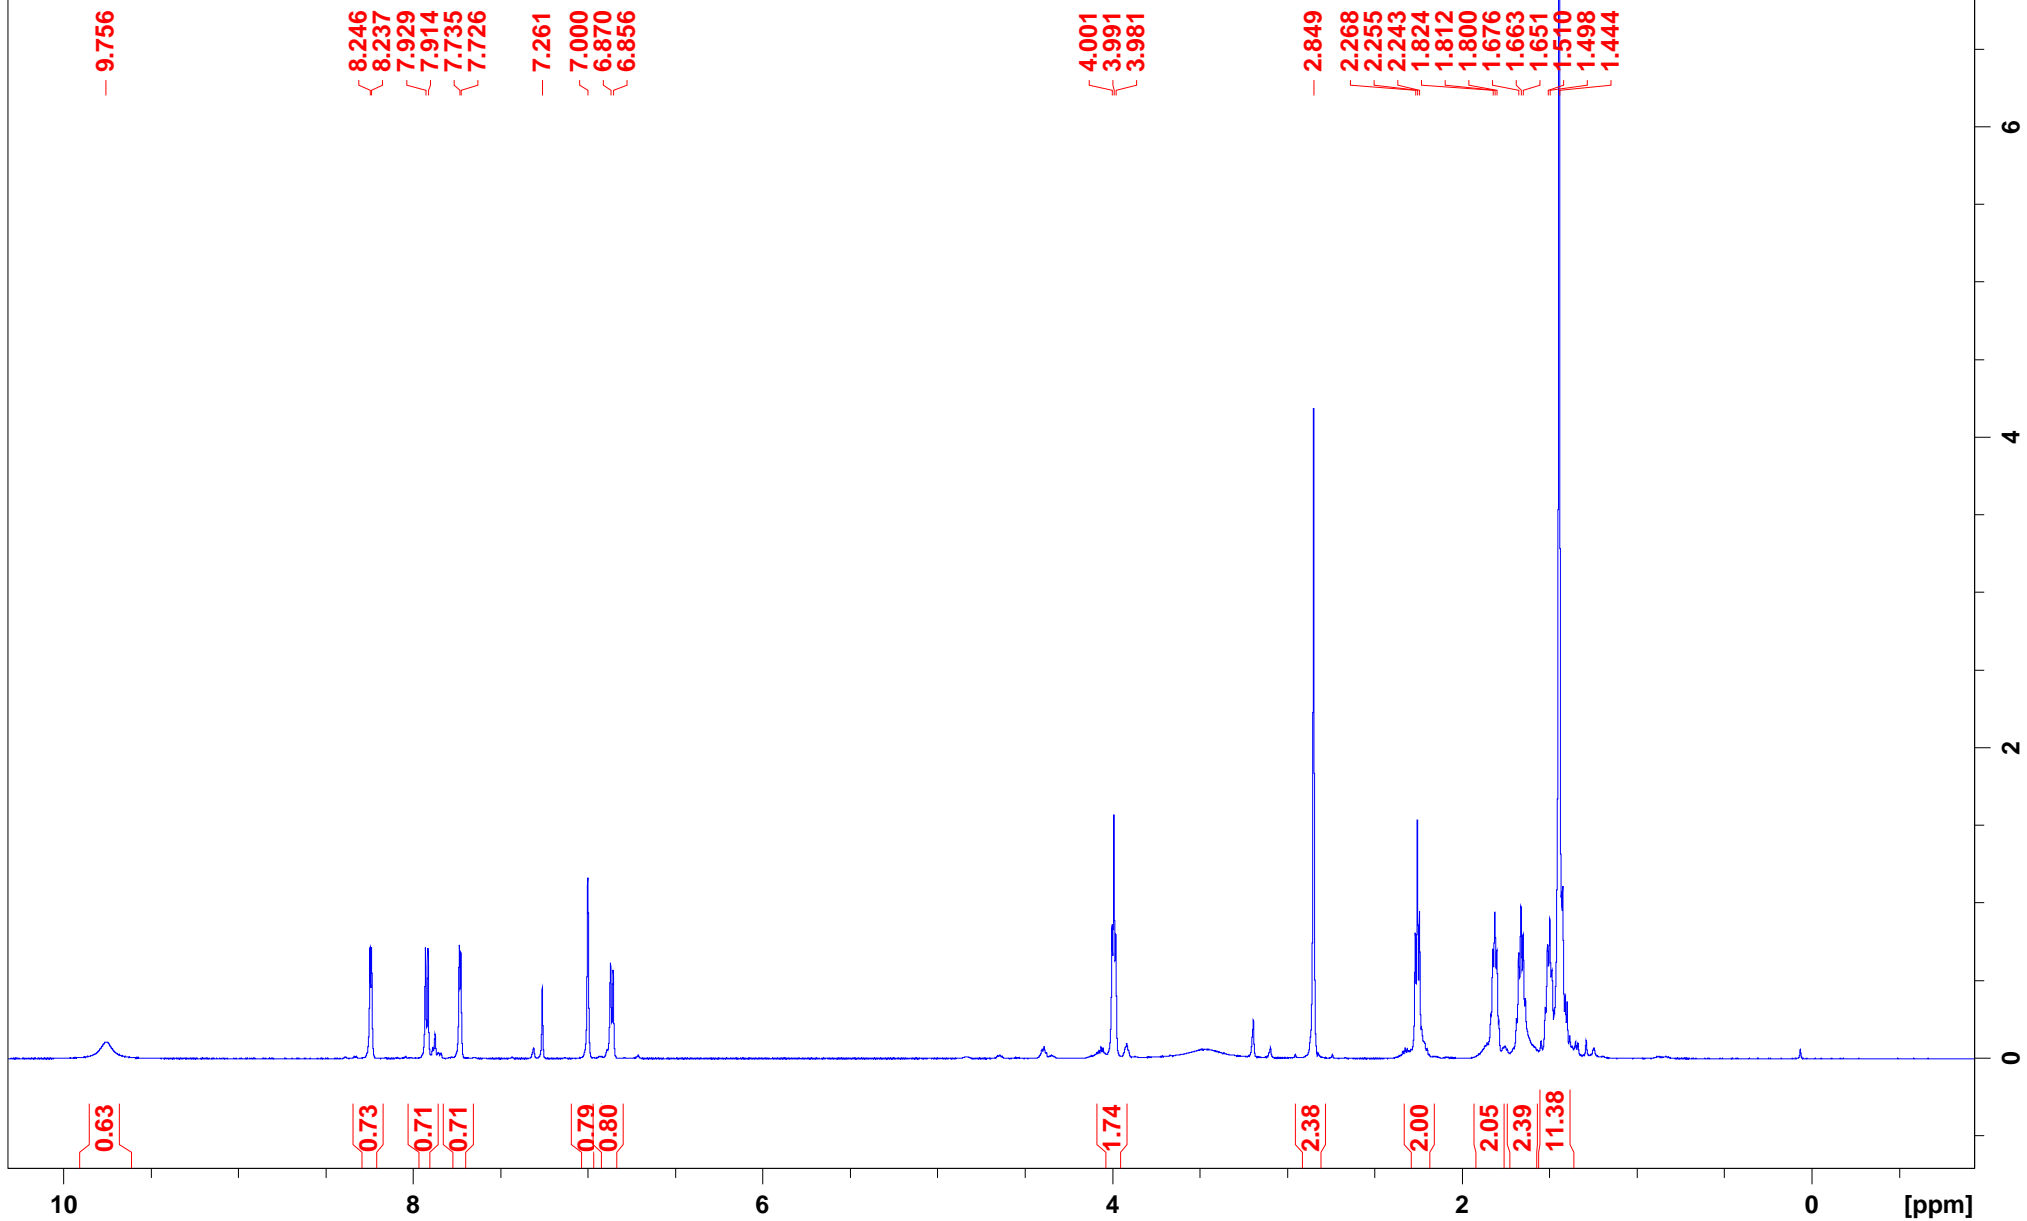

# <sup>1</sup>H-NMR of Compound 1-2k

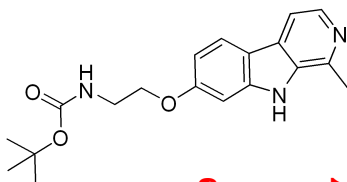

8.098  
8.089  
7.995  
7.981  
7.800  
7.791

7.054  
7.051  
6.898  
6.895  
6.884  
6.880

4.859

4.117  
4.108  
4.099

3.497  
3.488  
3.478  
3.305  
3.303  
3.300  
3.297  
3.295

2.758

0.80  
0.82  
0.82

0.82  
0.86

2.06

2.01

2.74

9.00

[ppm]

[rel]

<sup>1</sup>H-NMR of Compound 1-21

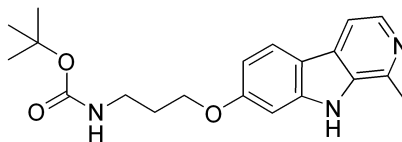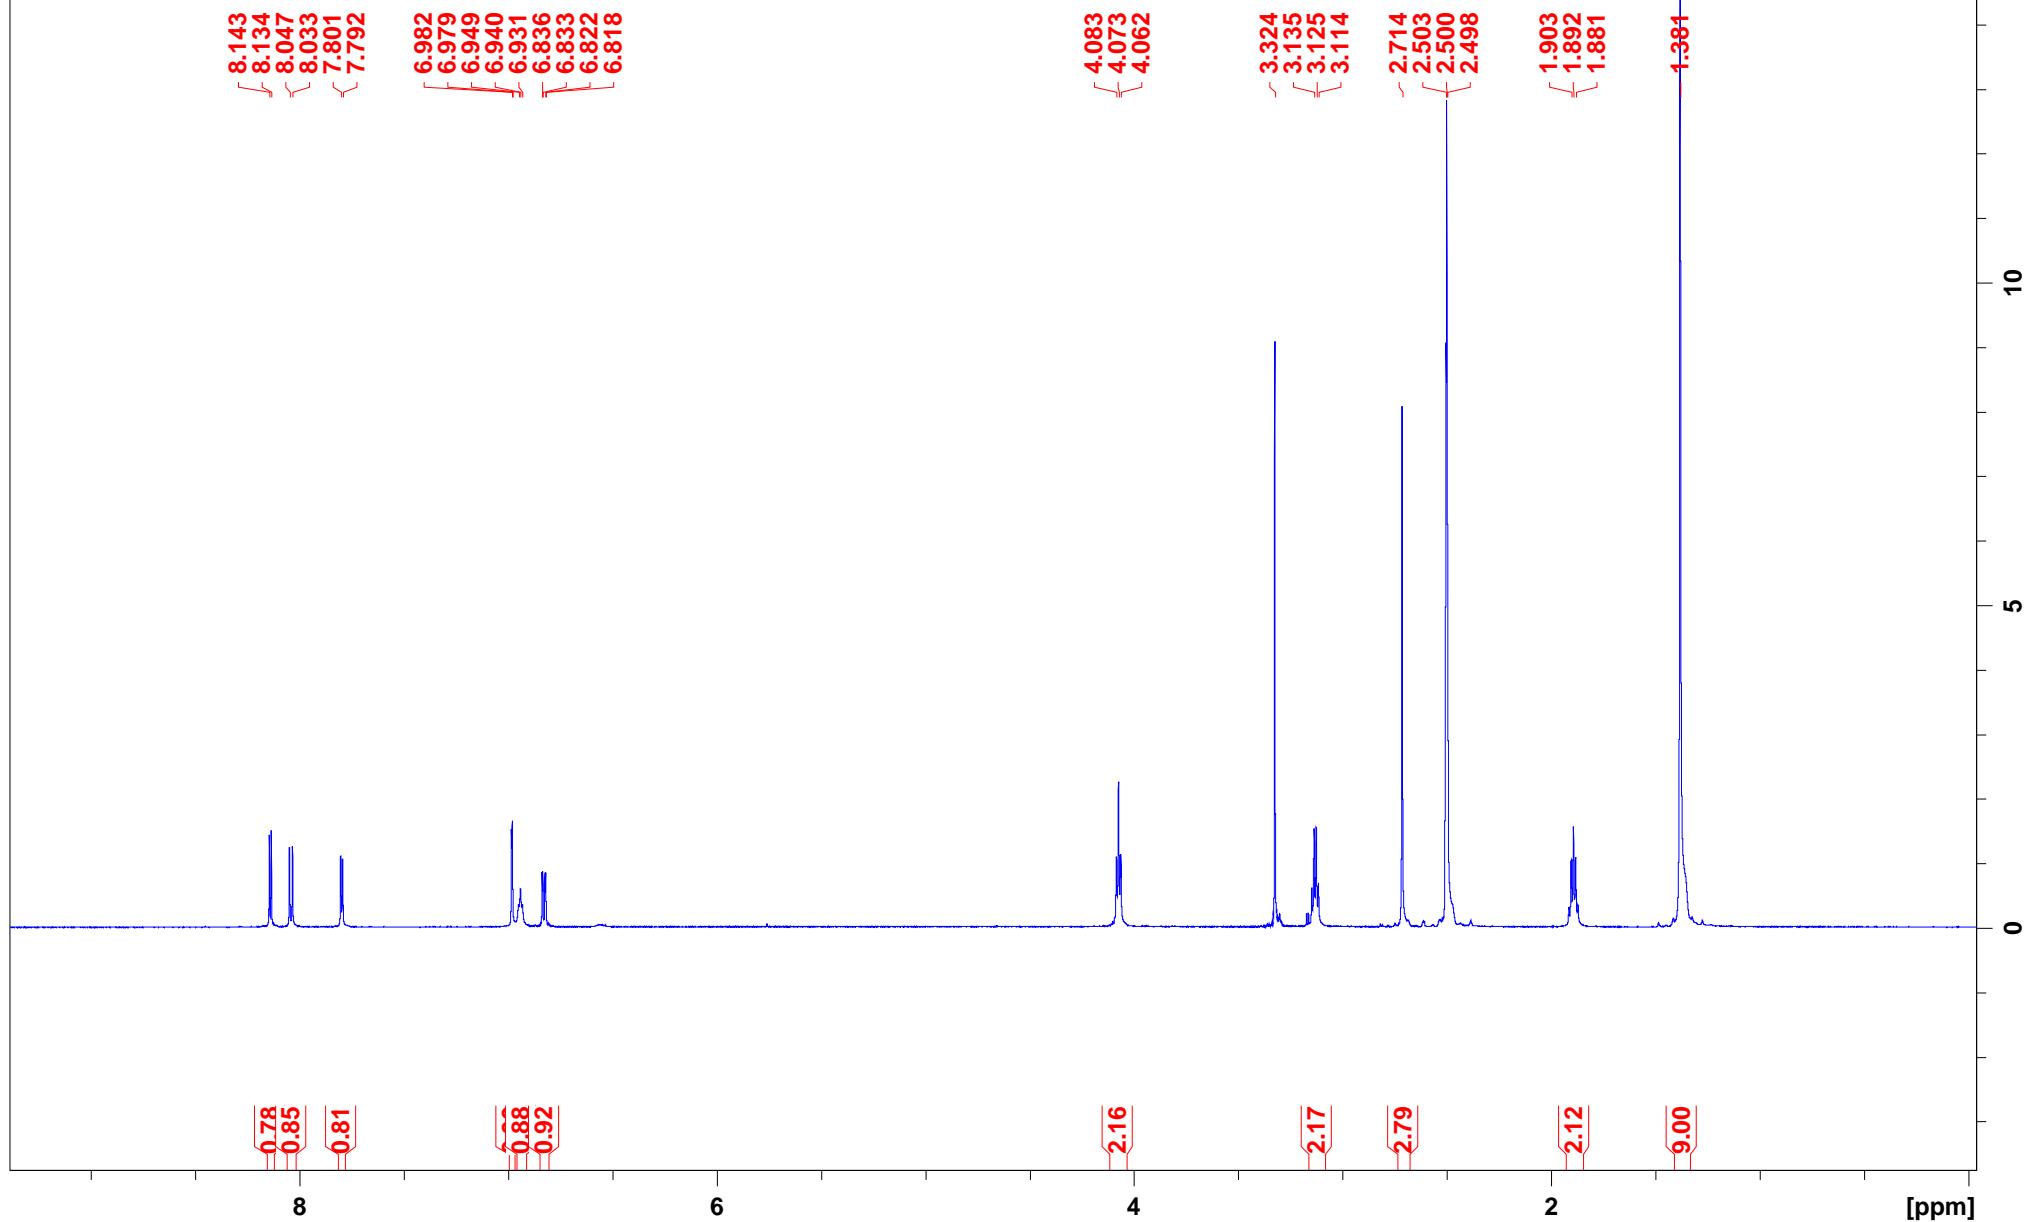

<sup>1</sup>H-NMR of Compound 1-2m

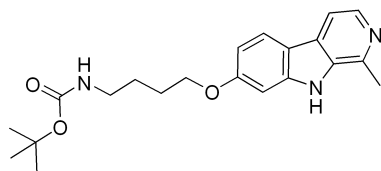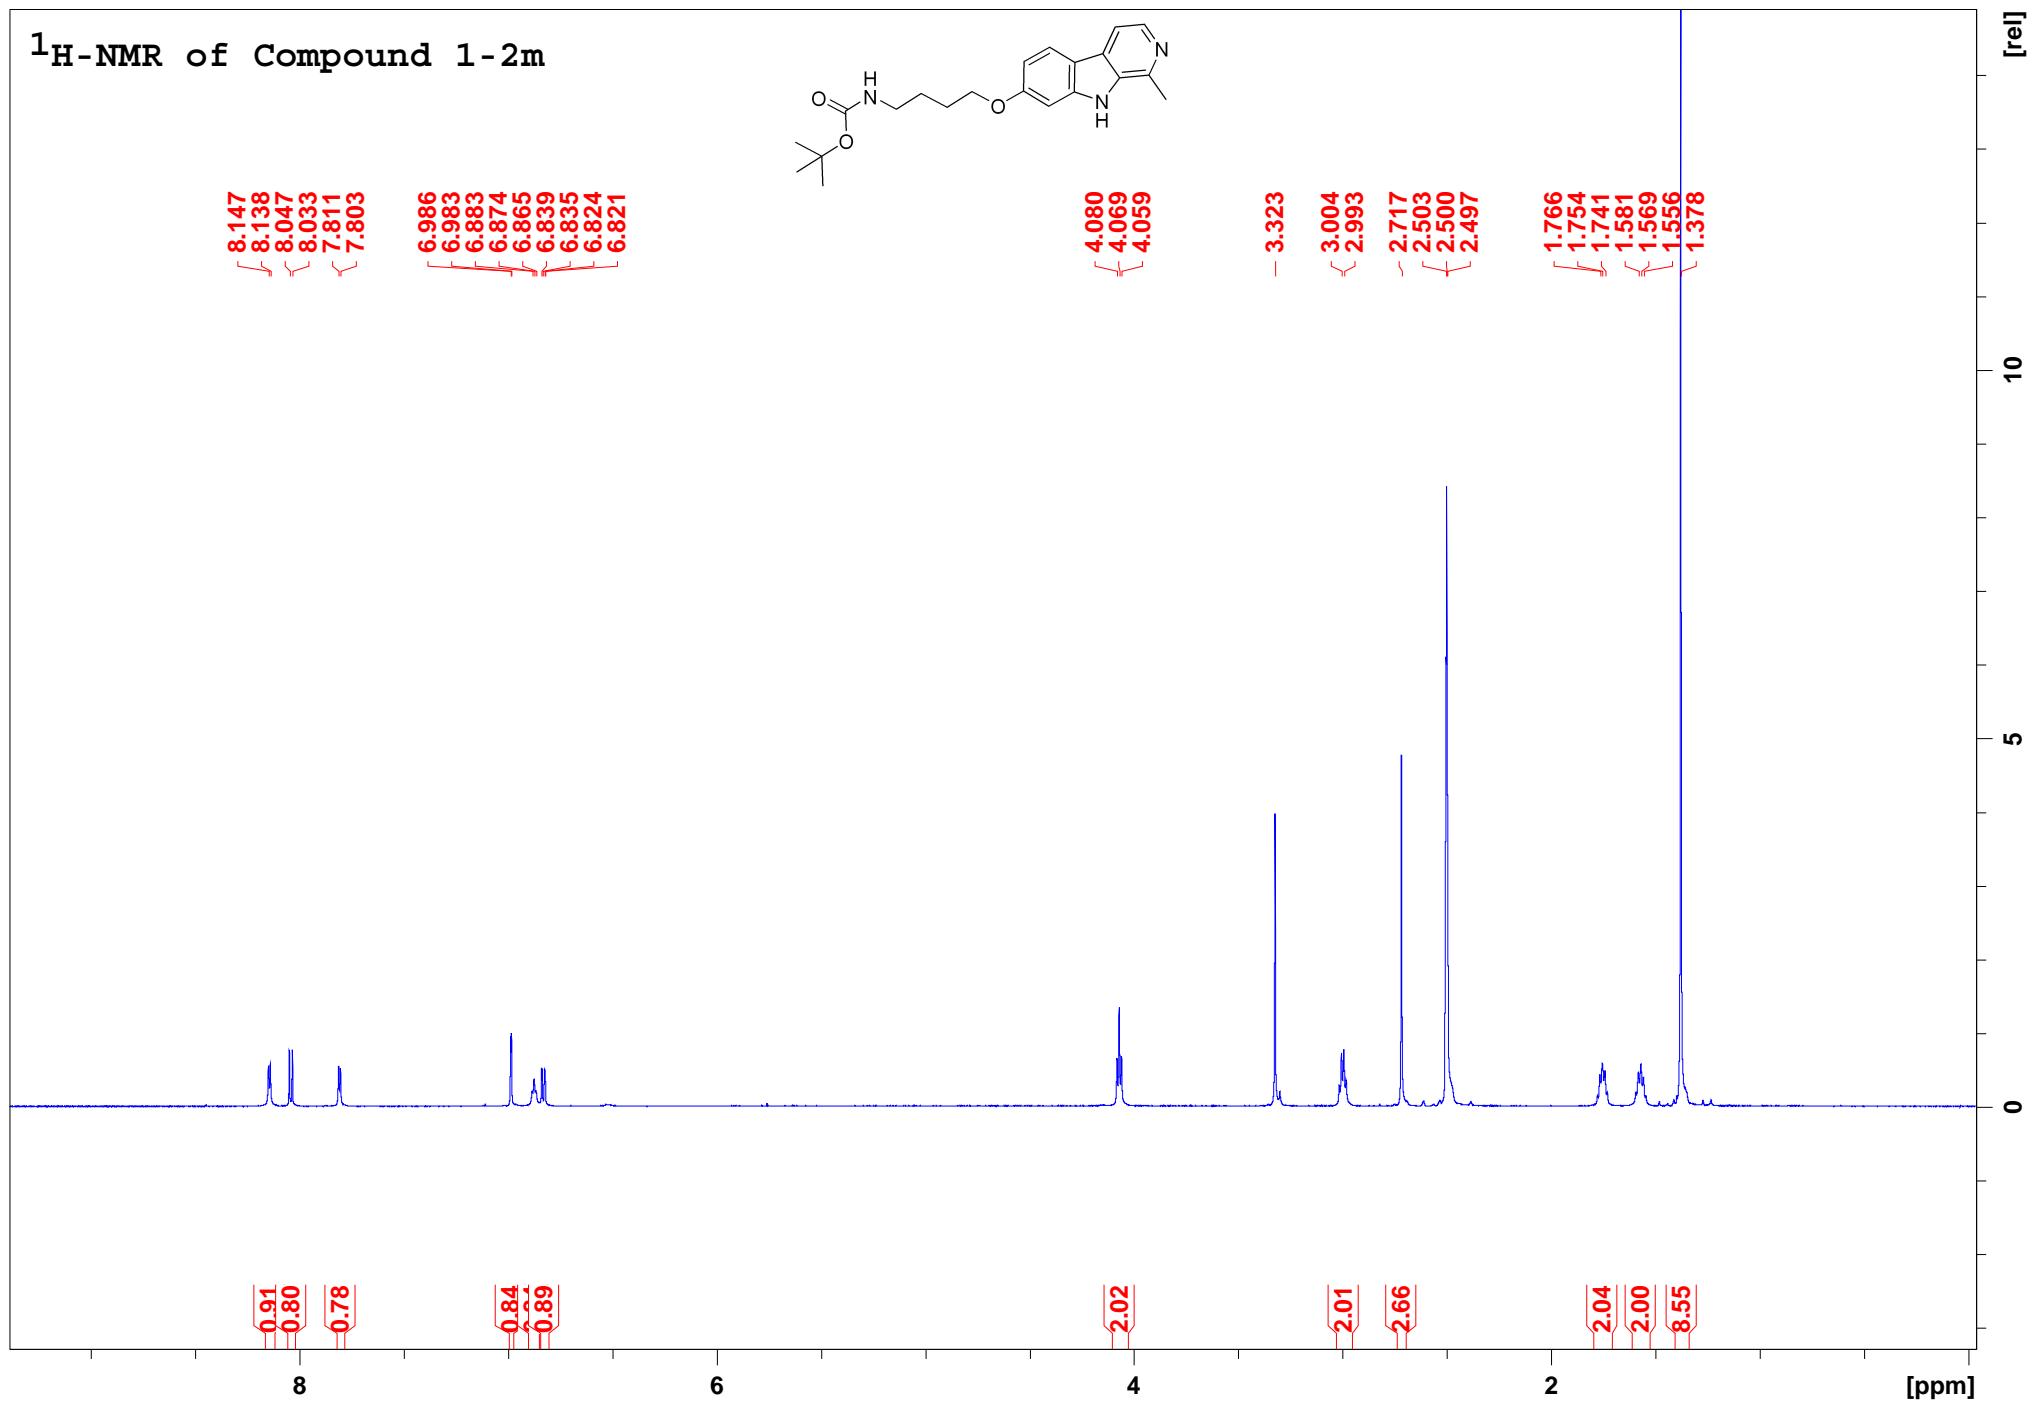

# <sup>1</sup>H-NMR of Compound 1-2n

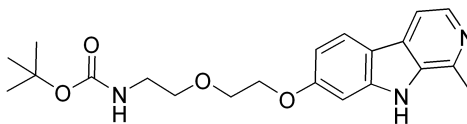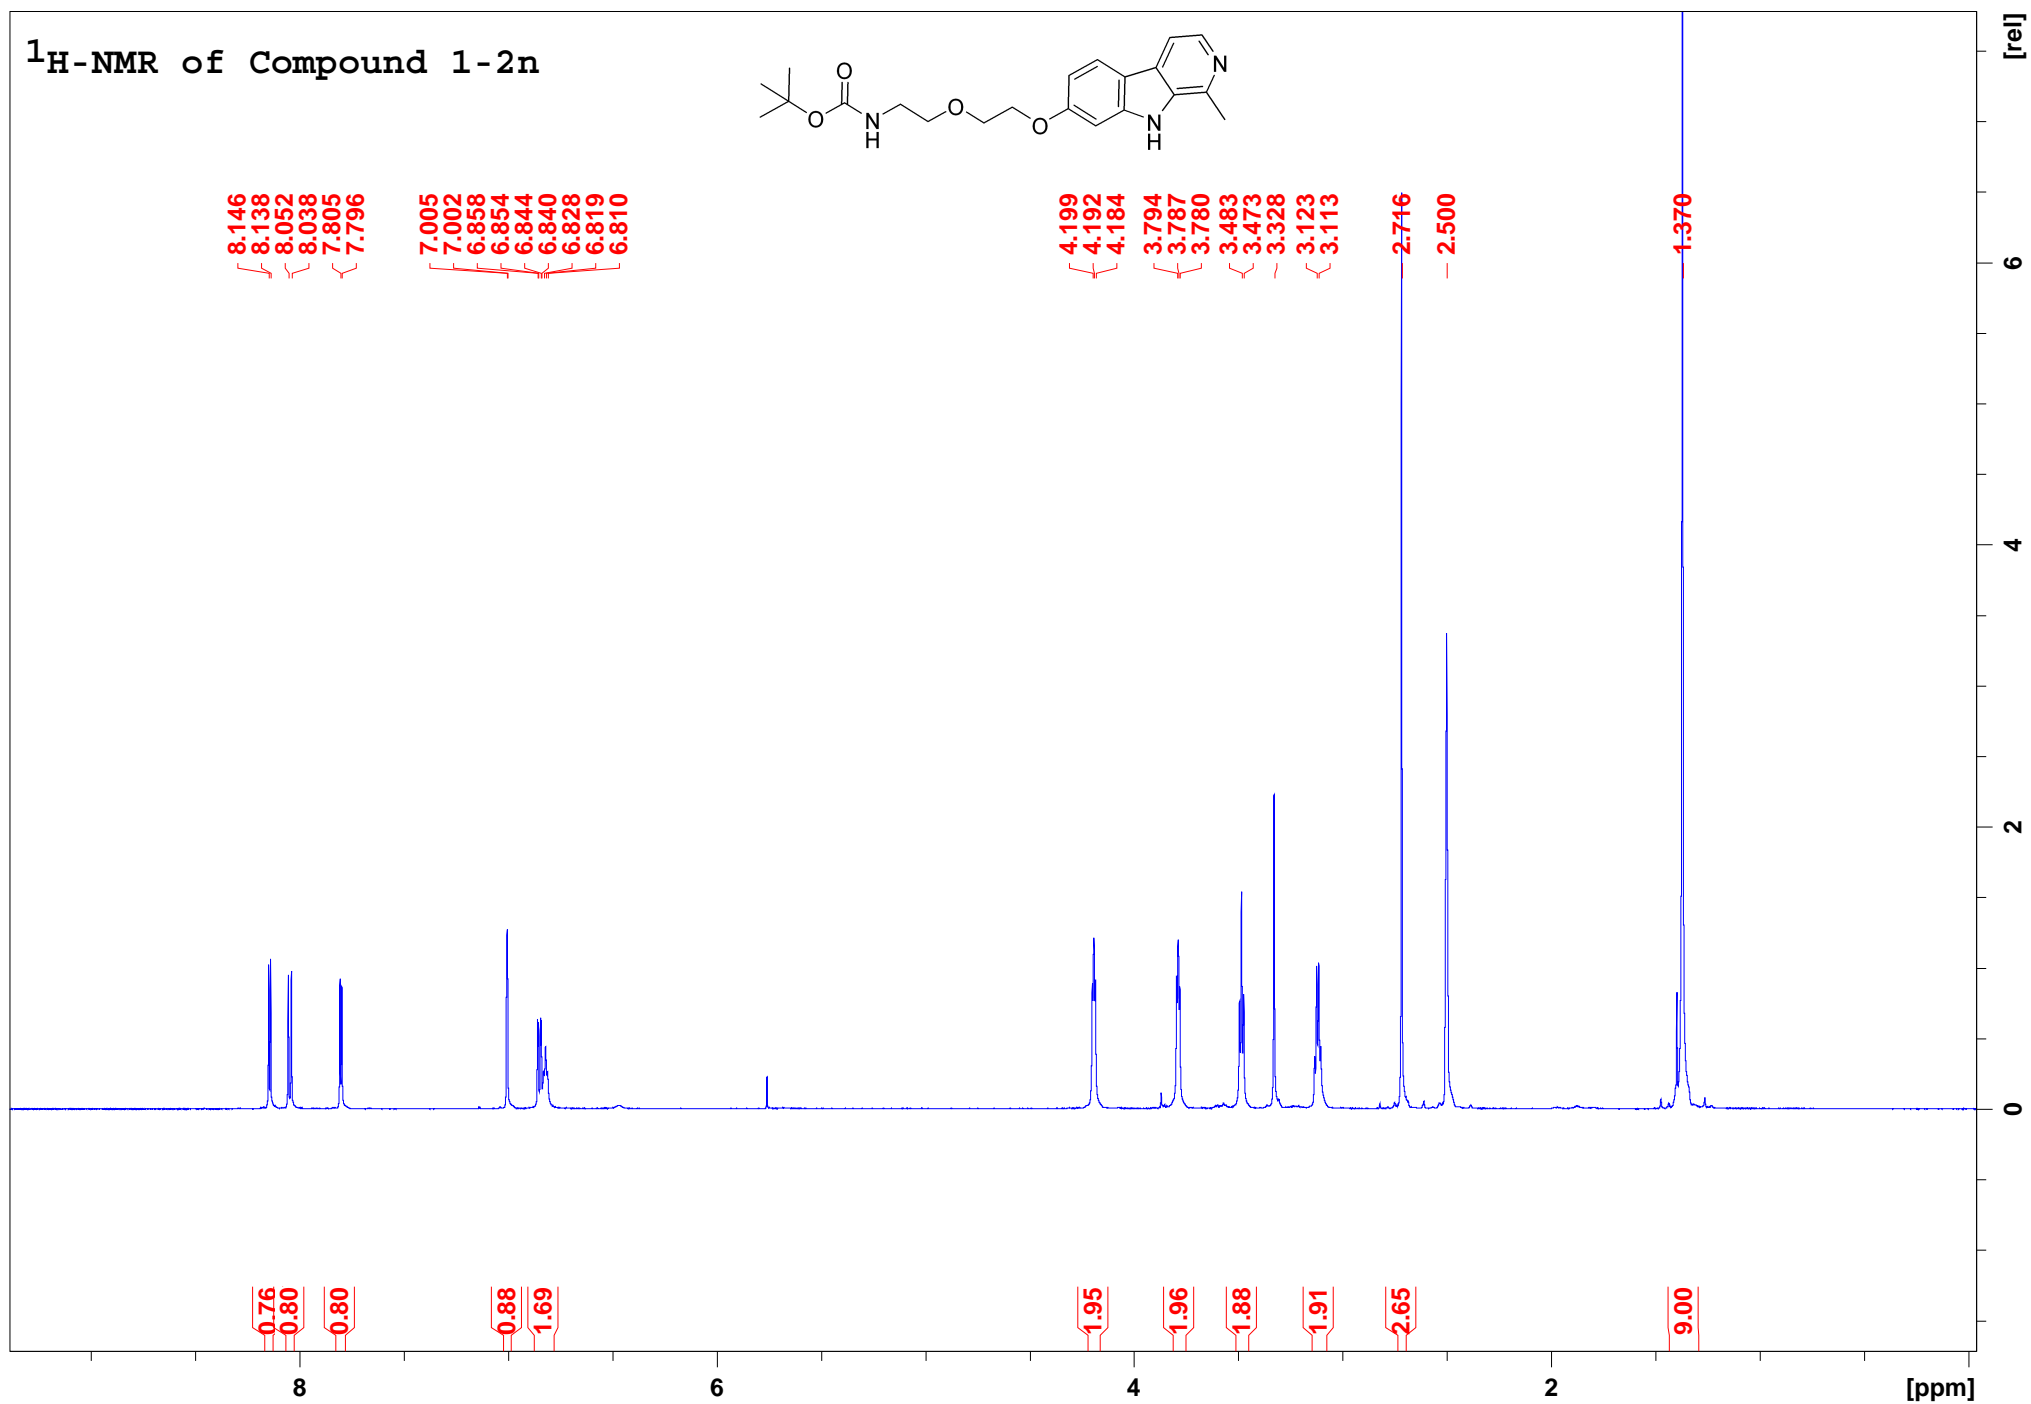

<sup>1</sup>H-NMR of Compound 1-2o

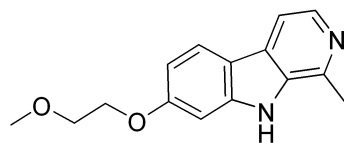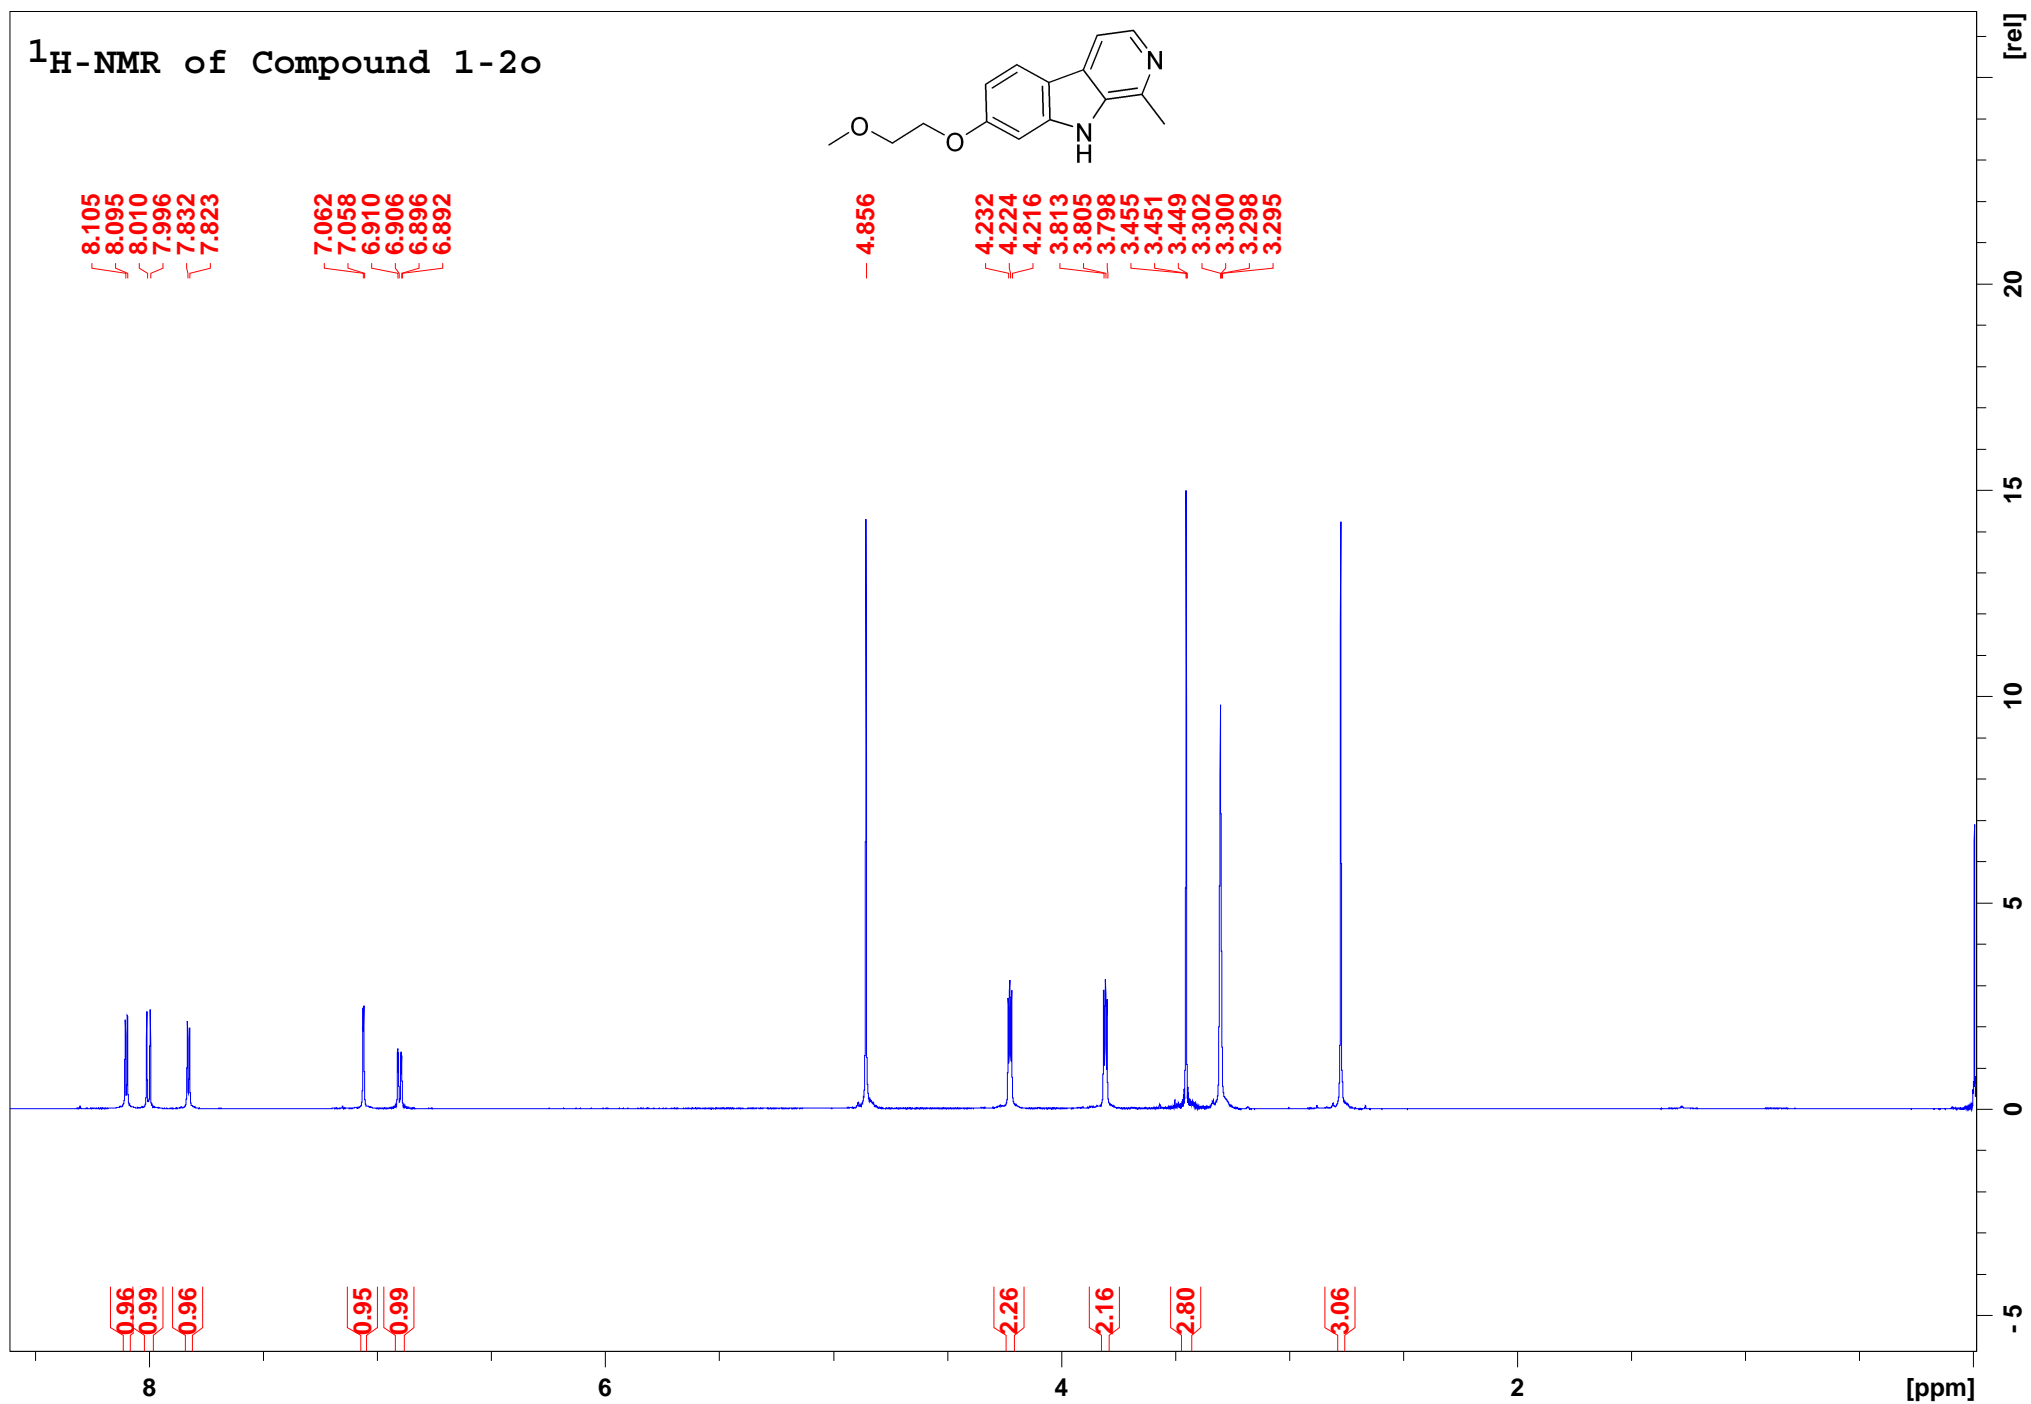



# <sup>1</sup>H-NMR of Compound 1-2p

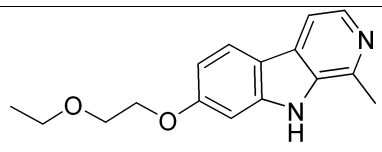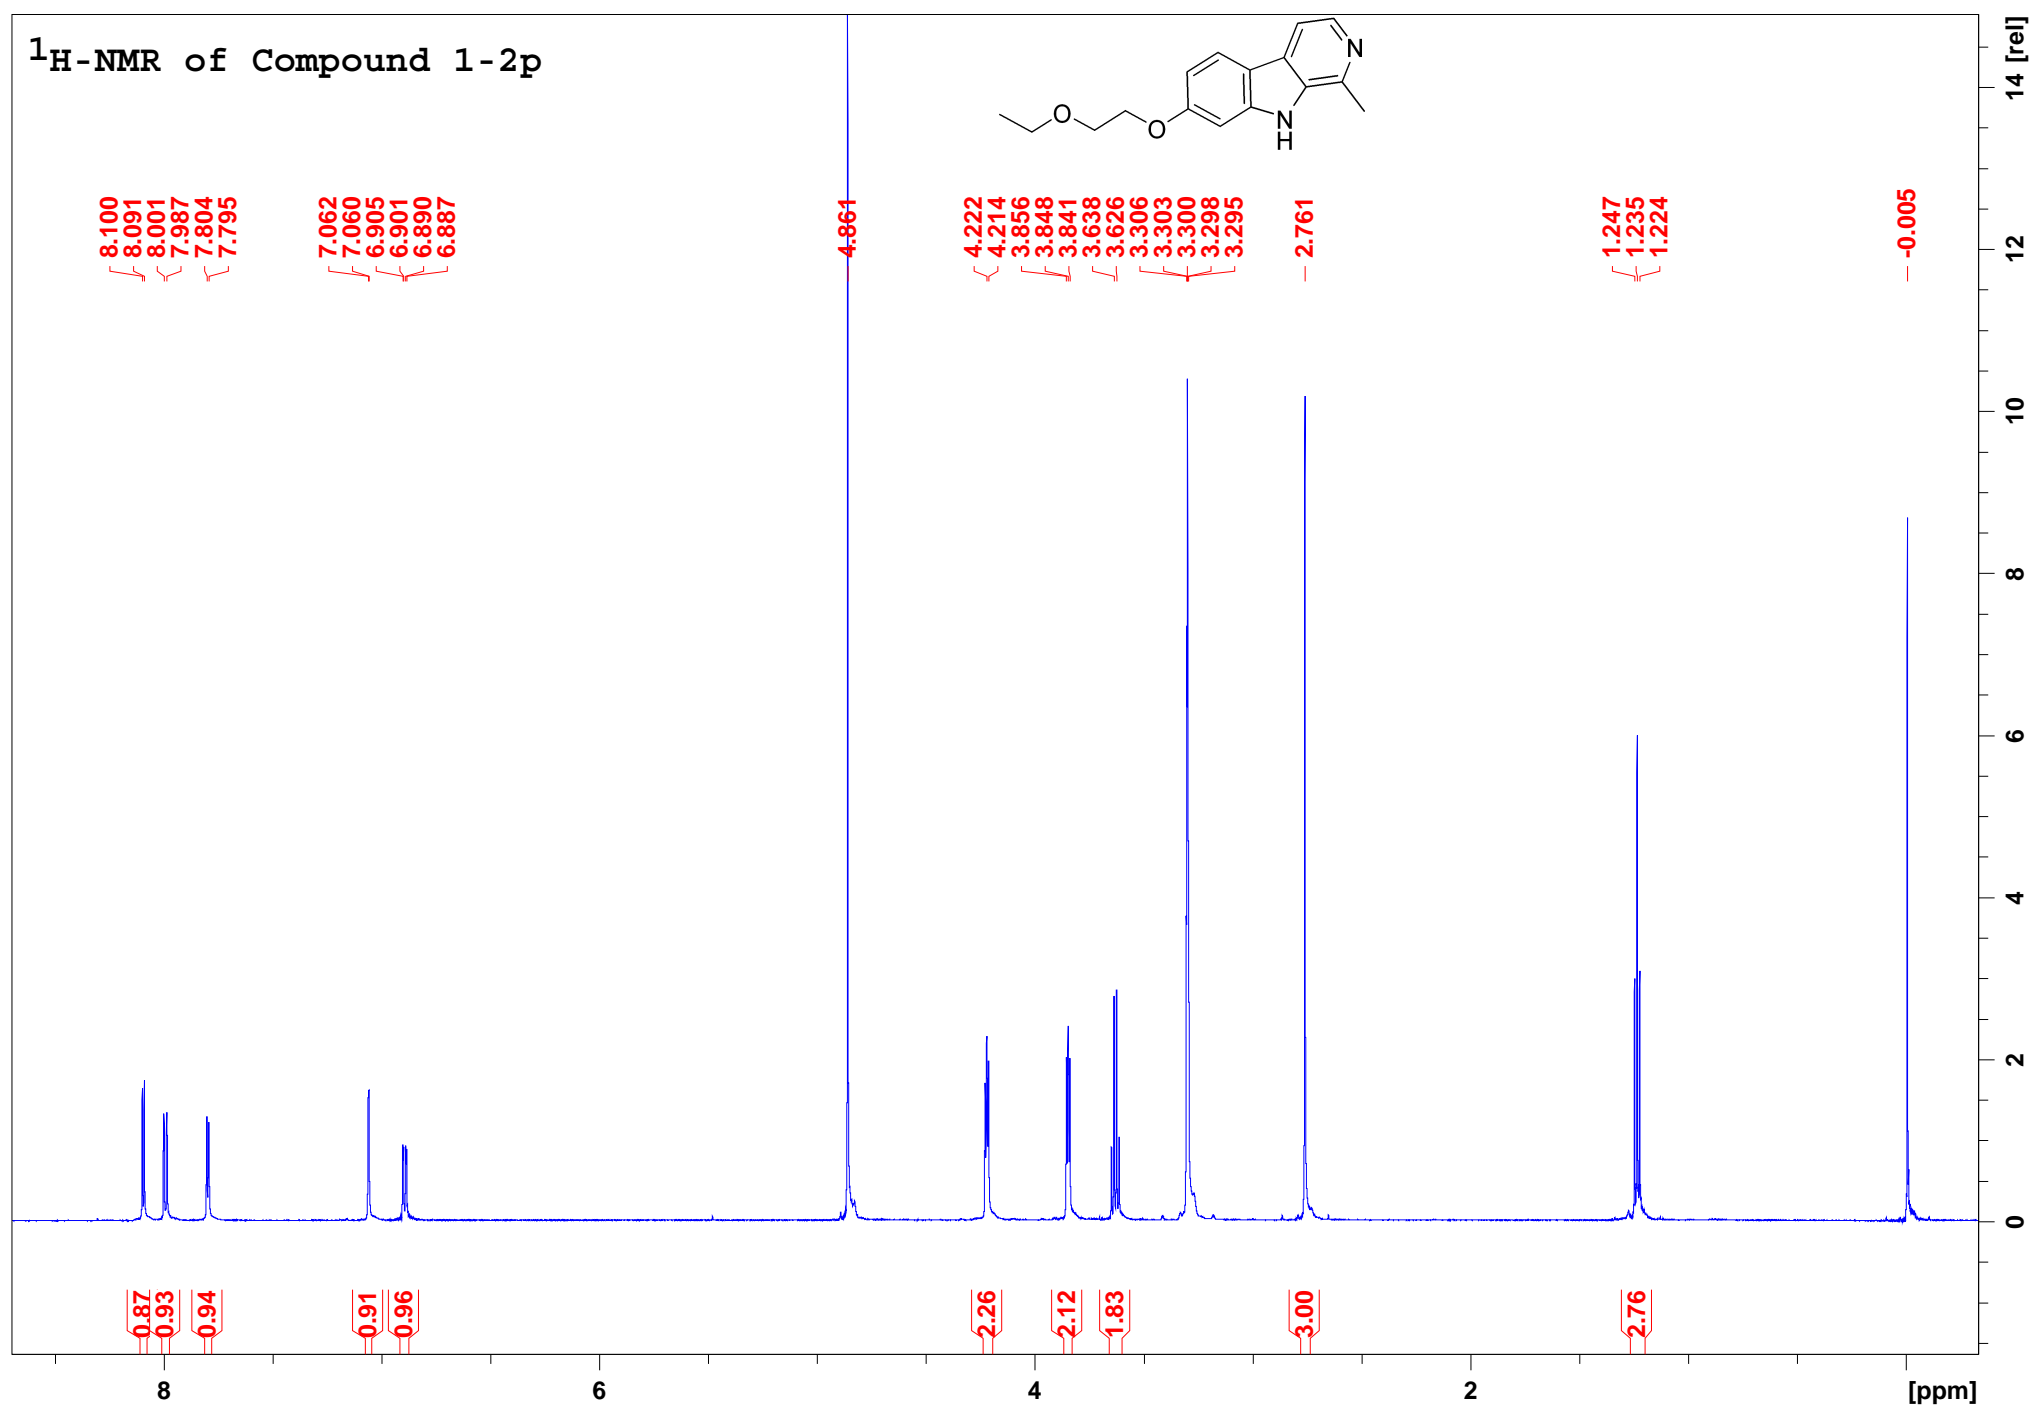

<sup>1</sup>H-NMR of Compound 1-3a

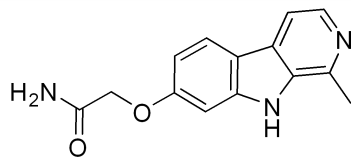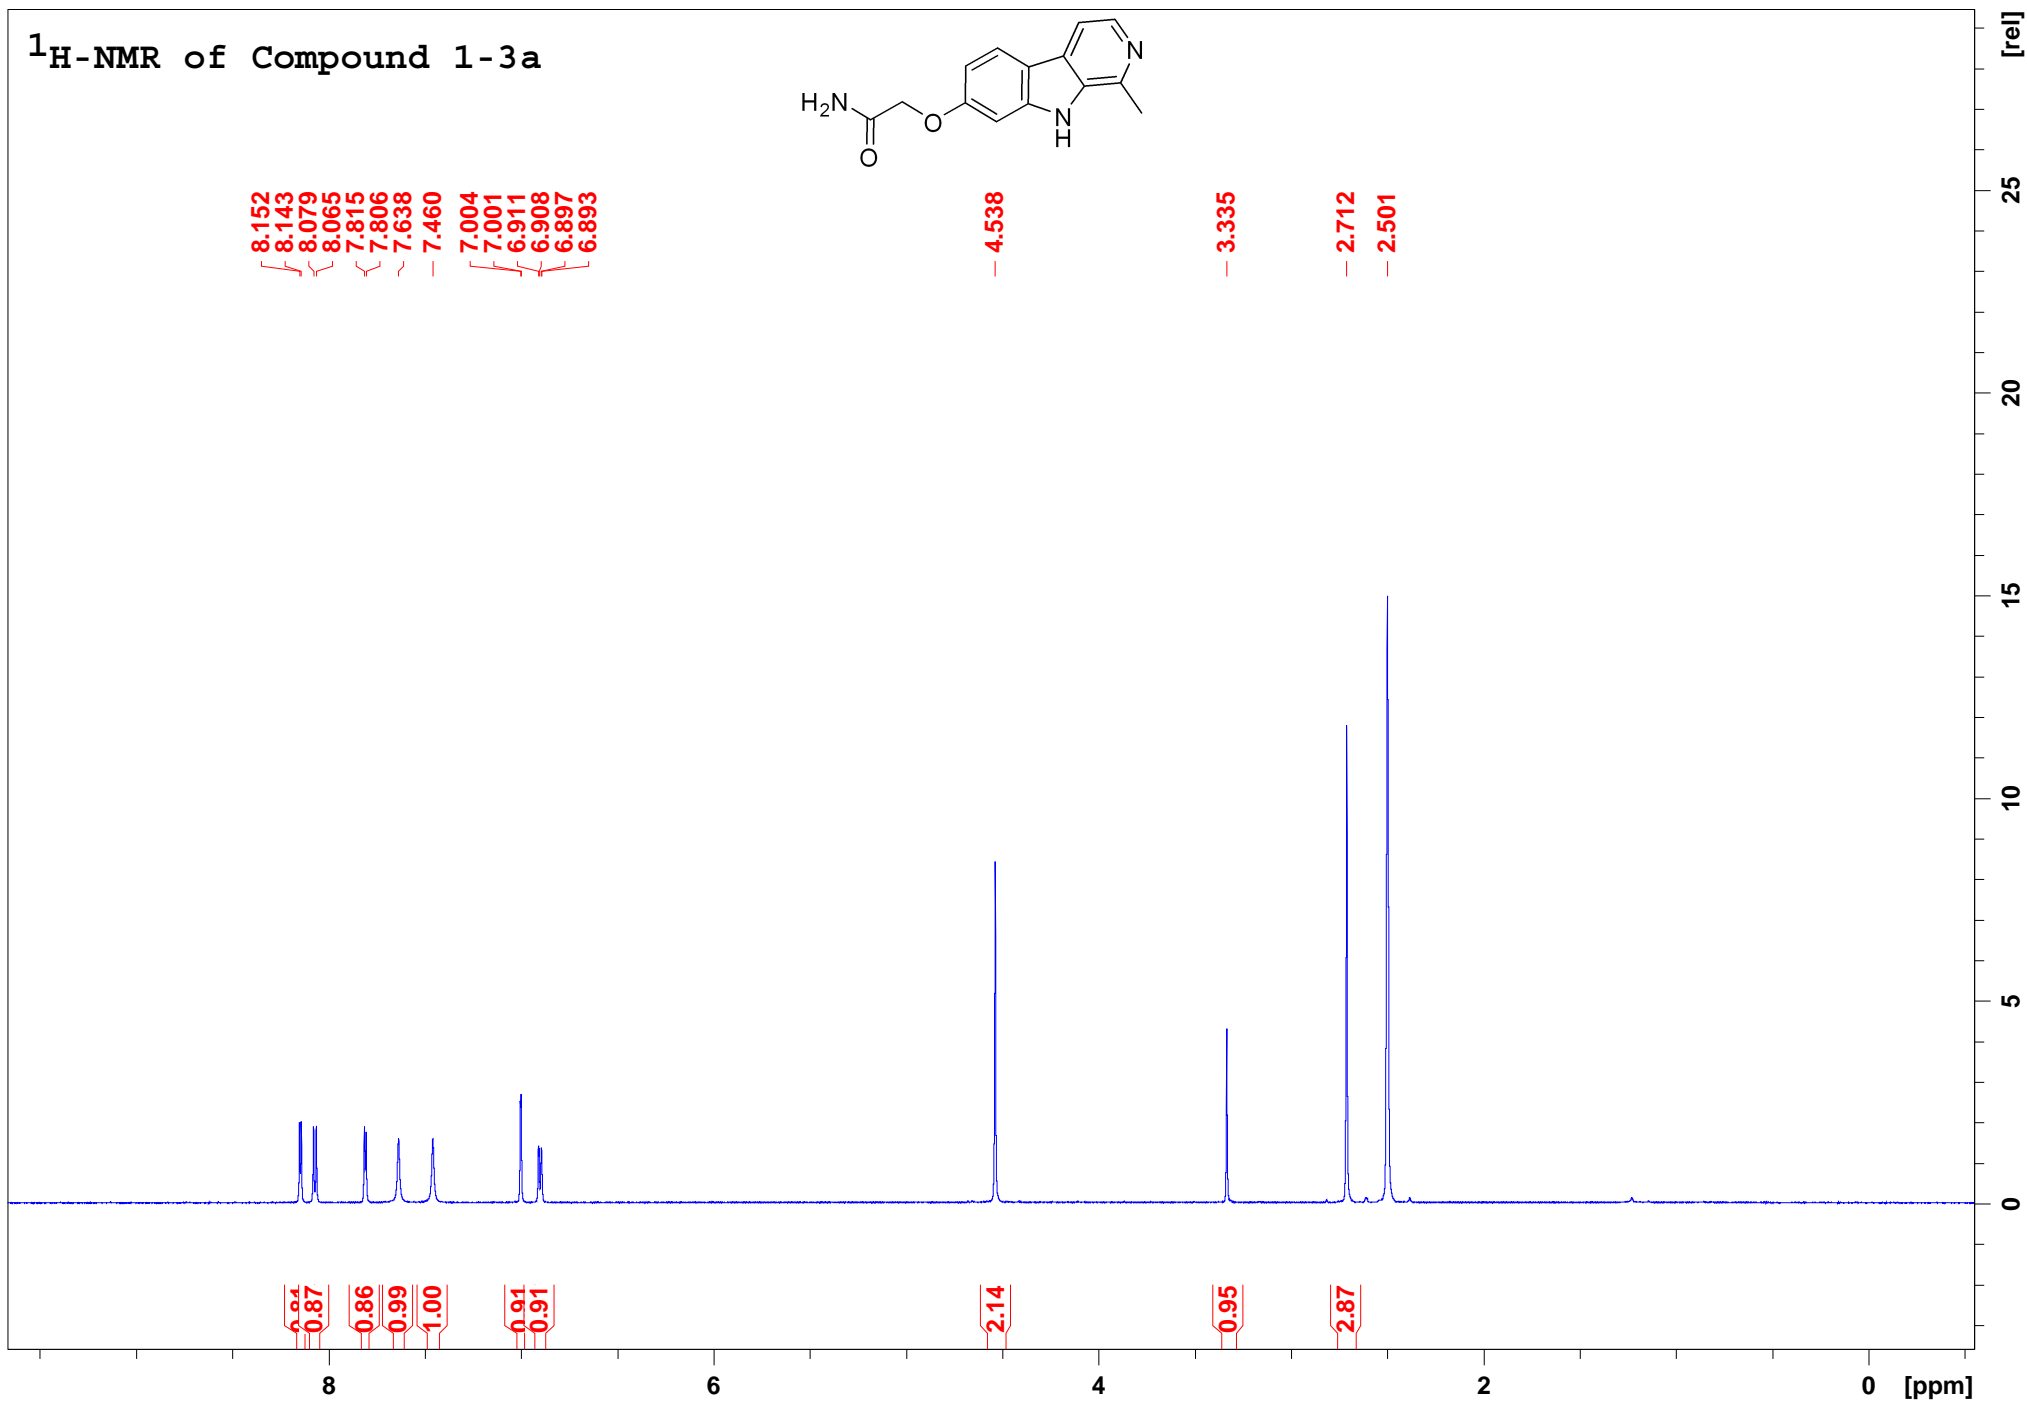

<sup>1</sup>H-NMR of Compound 1-3b

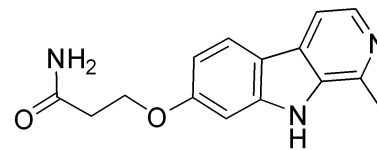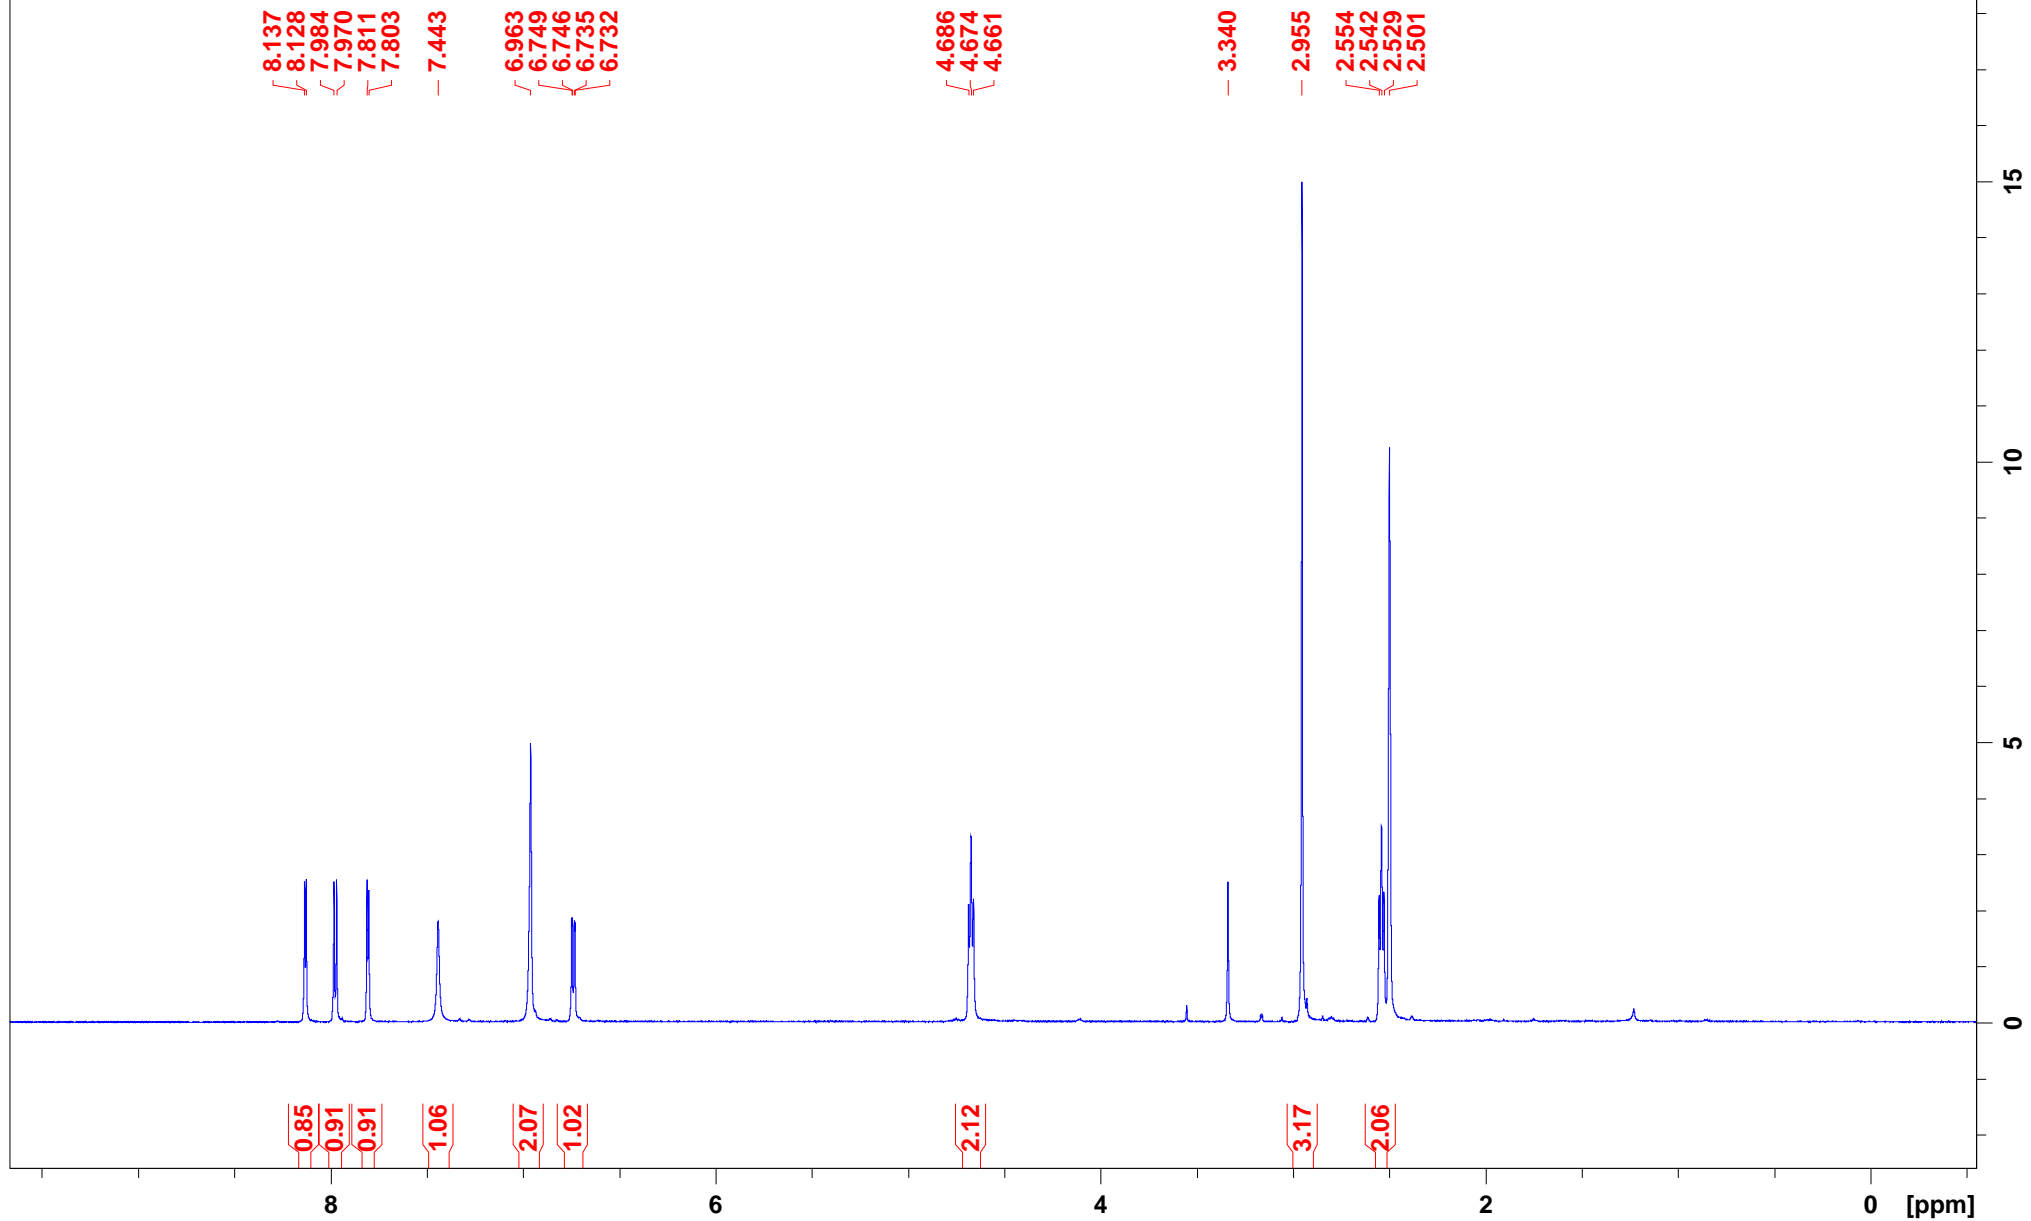

# <sup>1</sup>H-NMR of Compound 1-3c

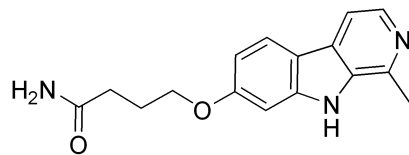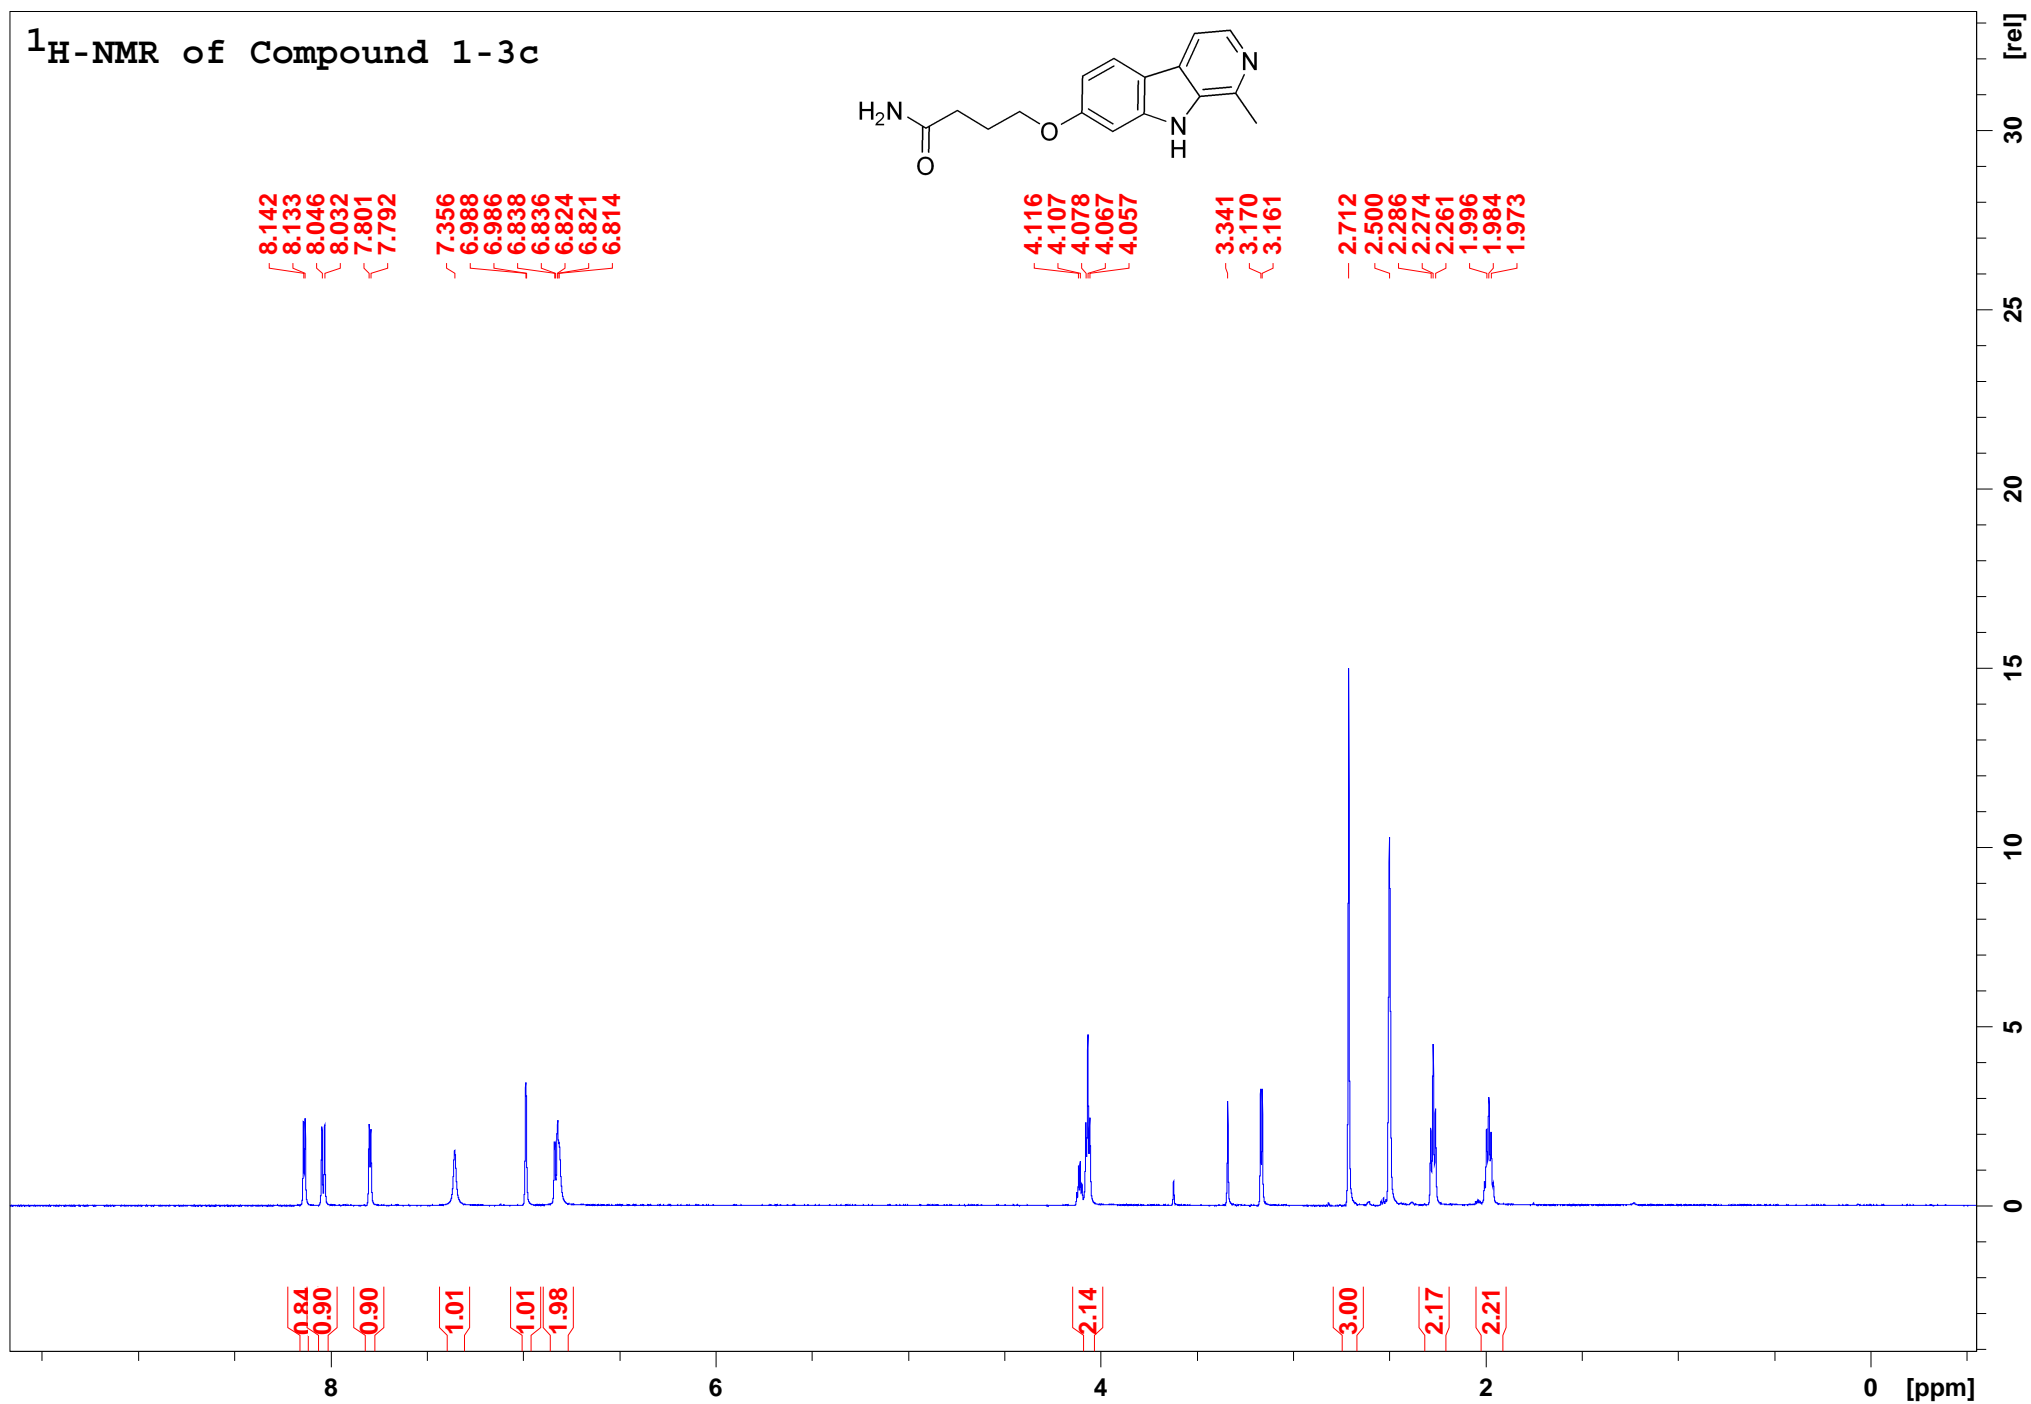

# <sup>1</sup>H-NMR of Compound 1-3d

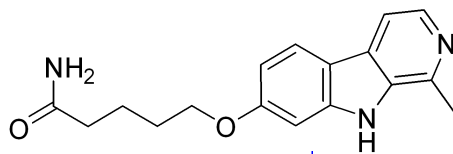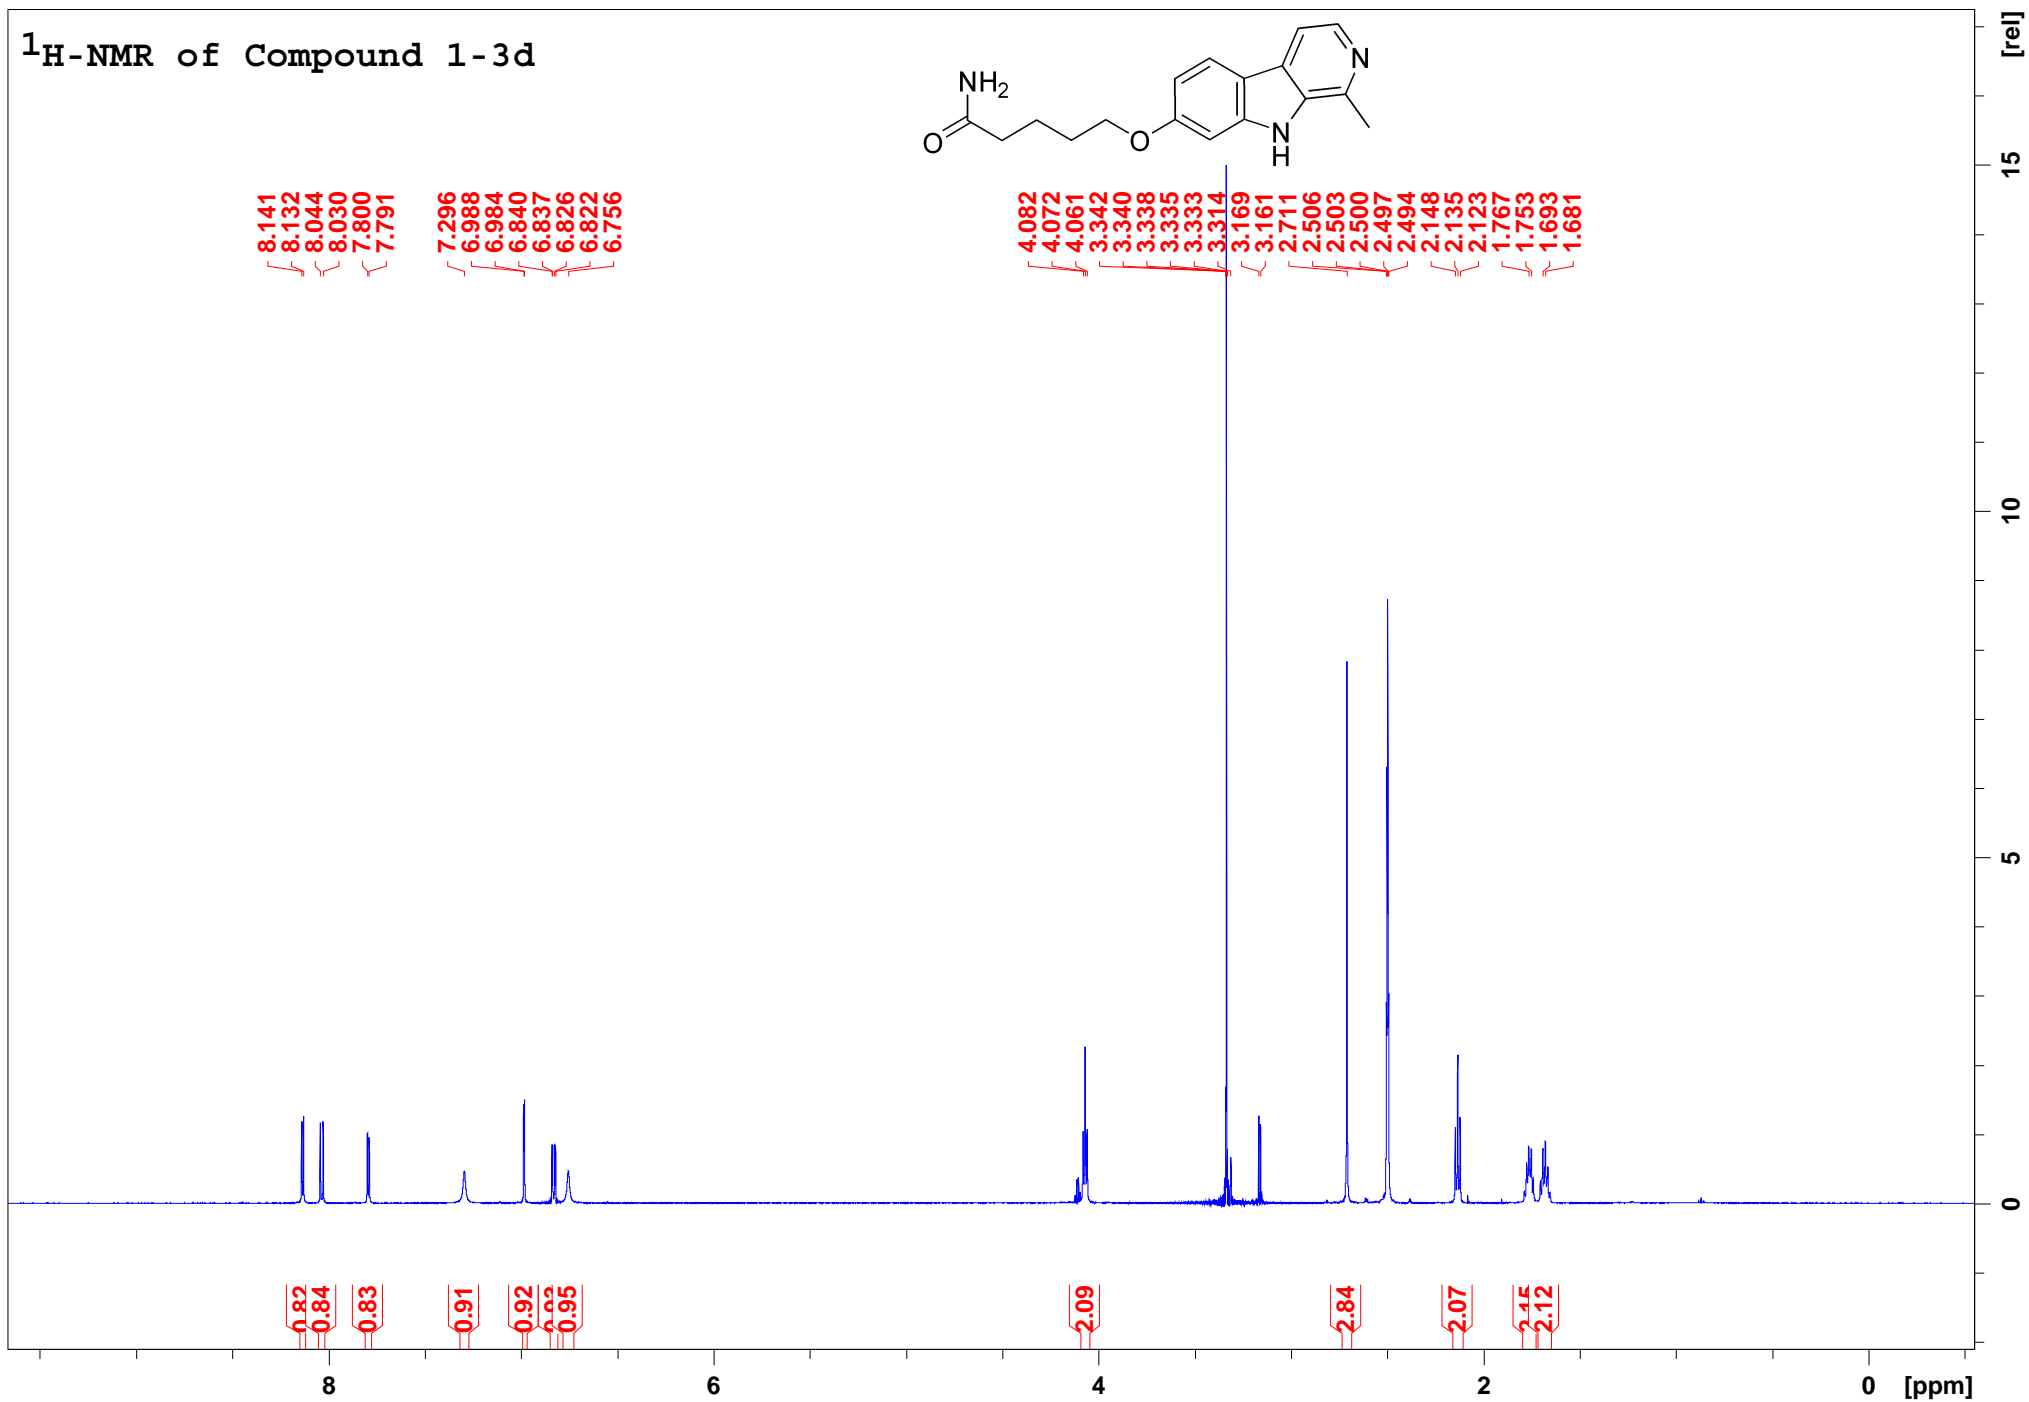

# <sup>1</sup>H-NMR of Compound 1-3e

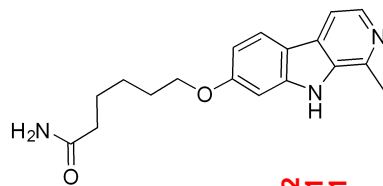

8.141  
8.132  
8.040  
8.026  
7.799  
7.791

7.268  
6.986  
6.982  
6.835  
6.831  
6.820  
6.817  
6.727

4.072  
4.061  
4.051

3.339  
3.170  
3.161

2.712  
2.503  
2.500  
2.497

2.093  
2.081  
2.069  
1.786  
1.774  
1.762

1.585  
1.572  
1.559  
1.455  
1.443

0.78  
0.84  
0.84

1.01

0.96  
0.93  
0.97

2.15

2.88

2.14

2.17

2.18  
2.18

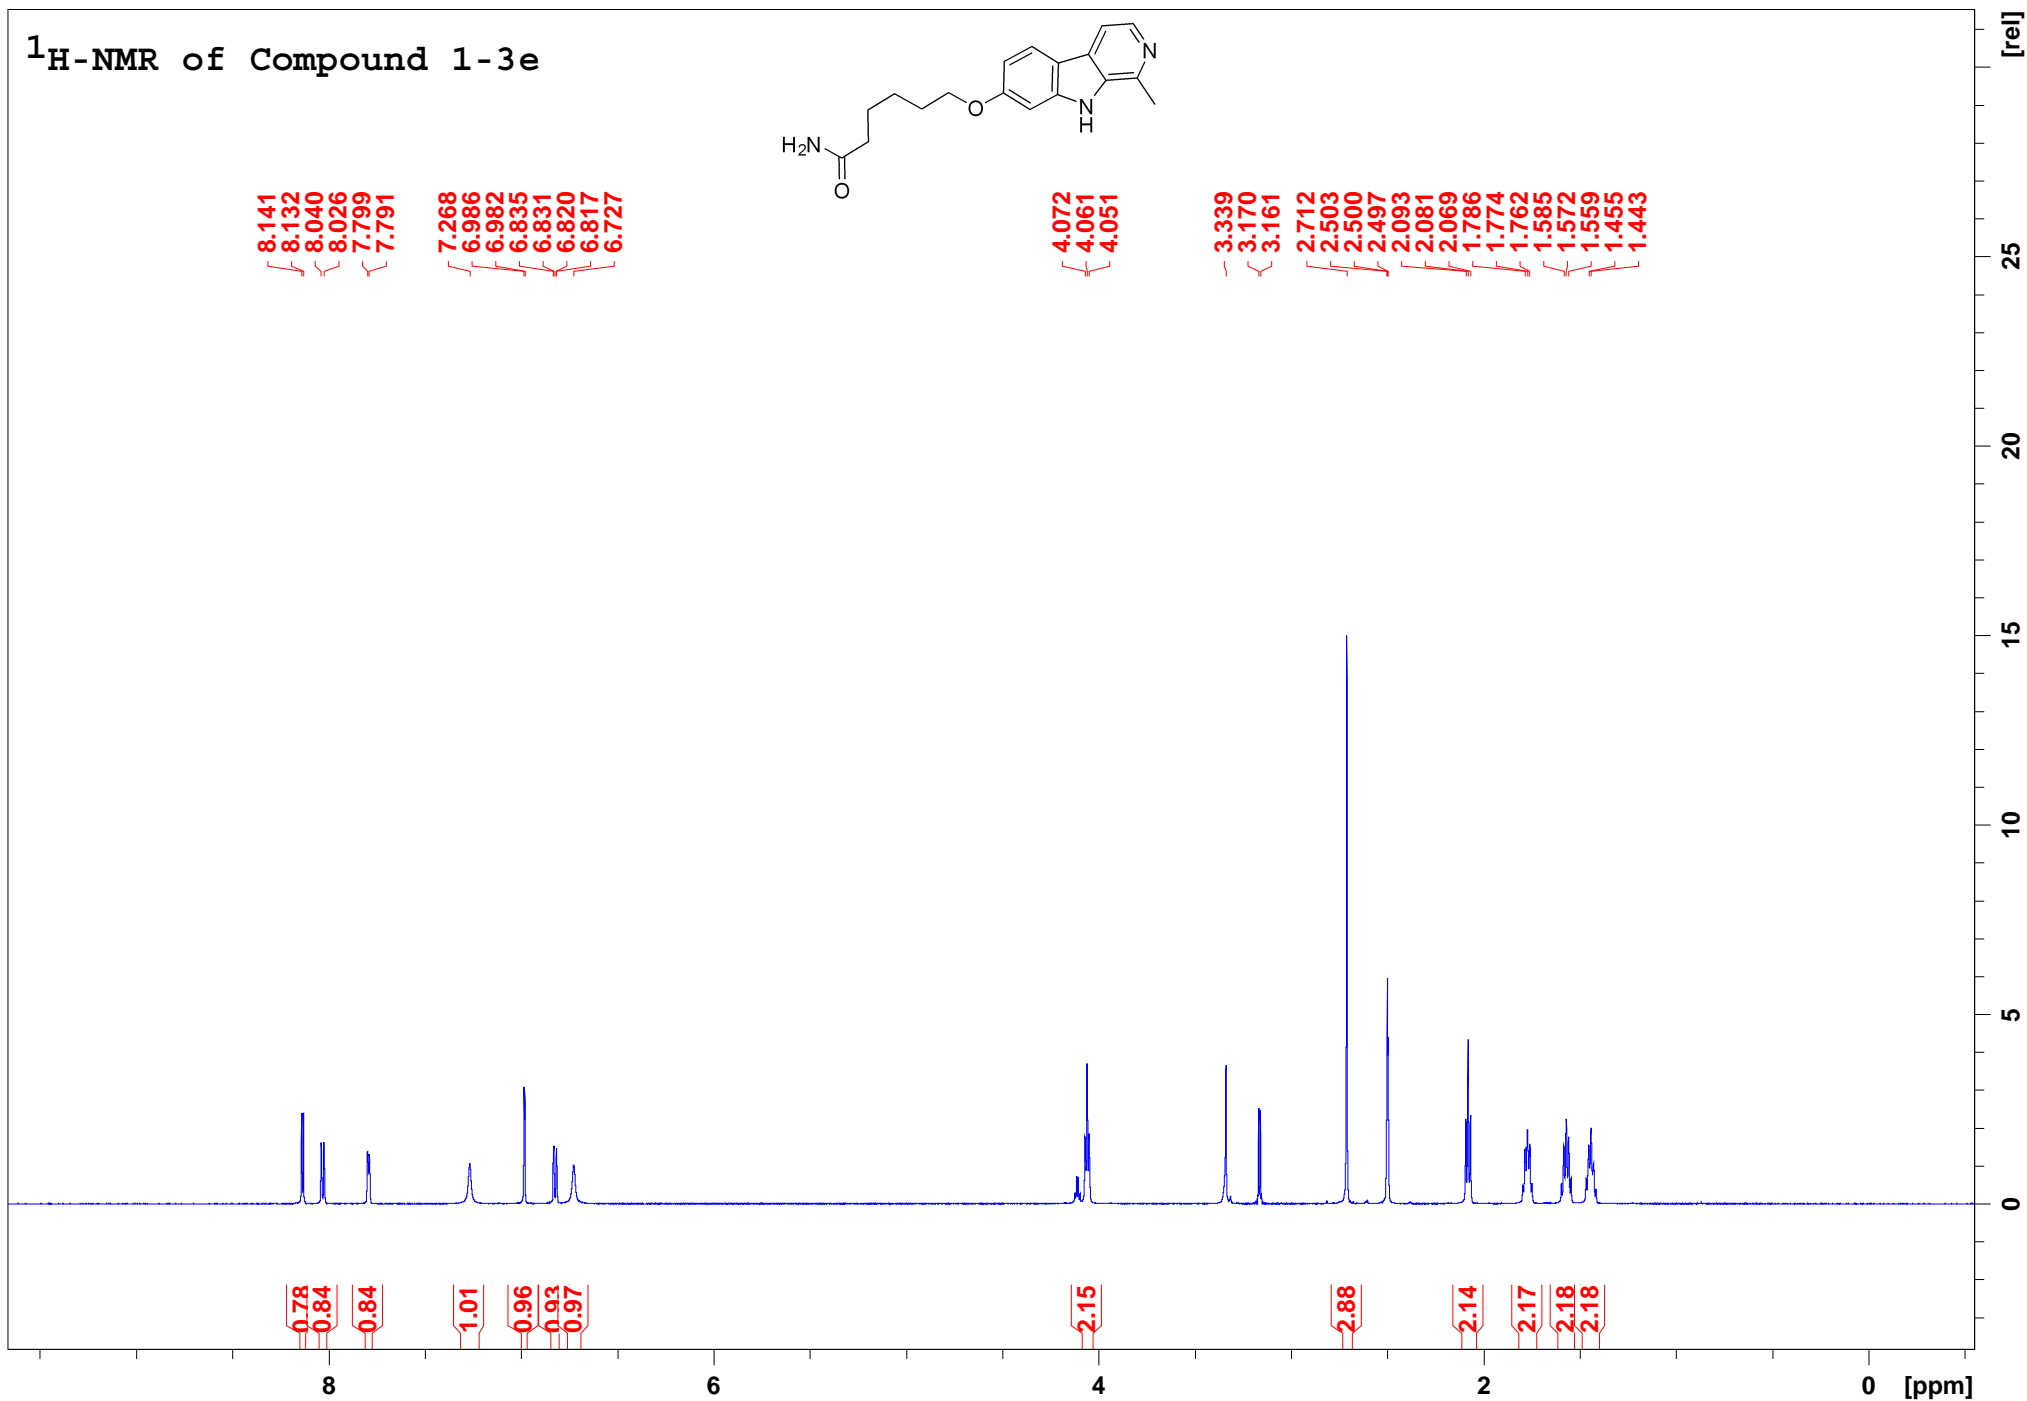

<sup>1</sup>H-NMR of Compound 1-4a

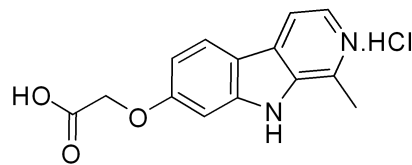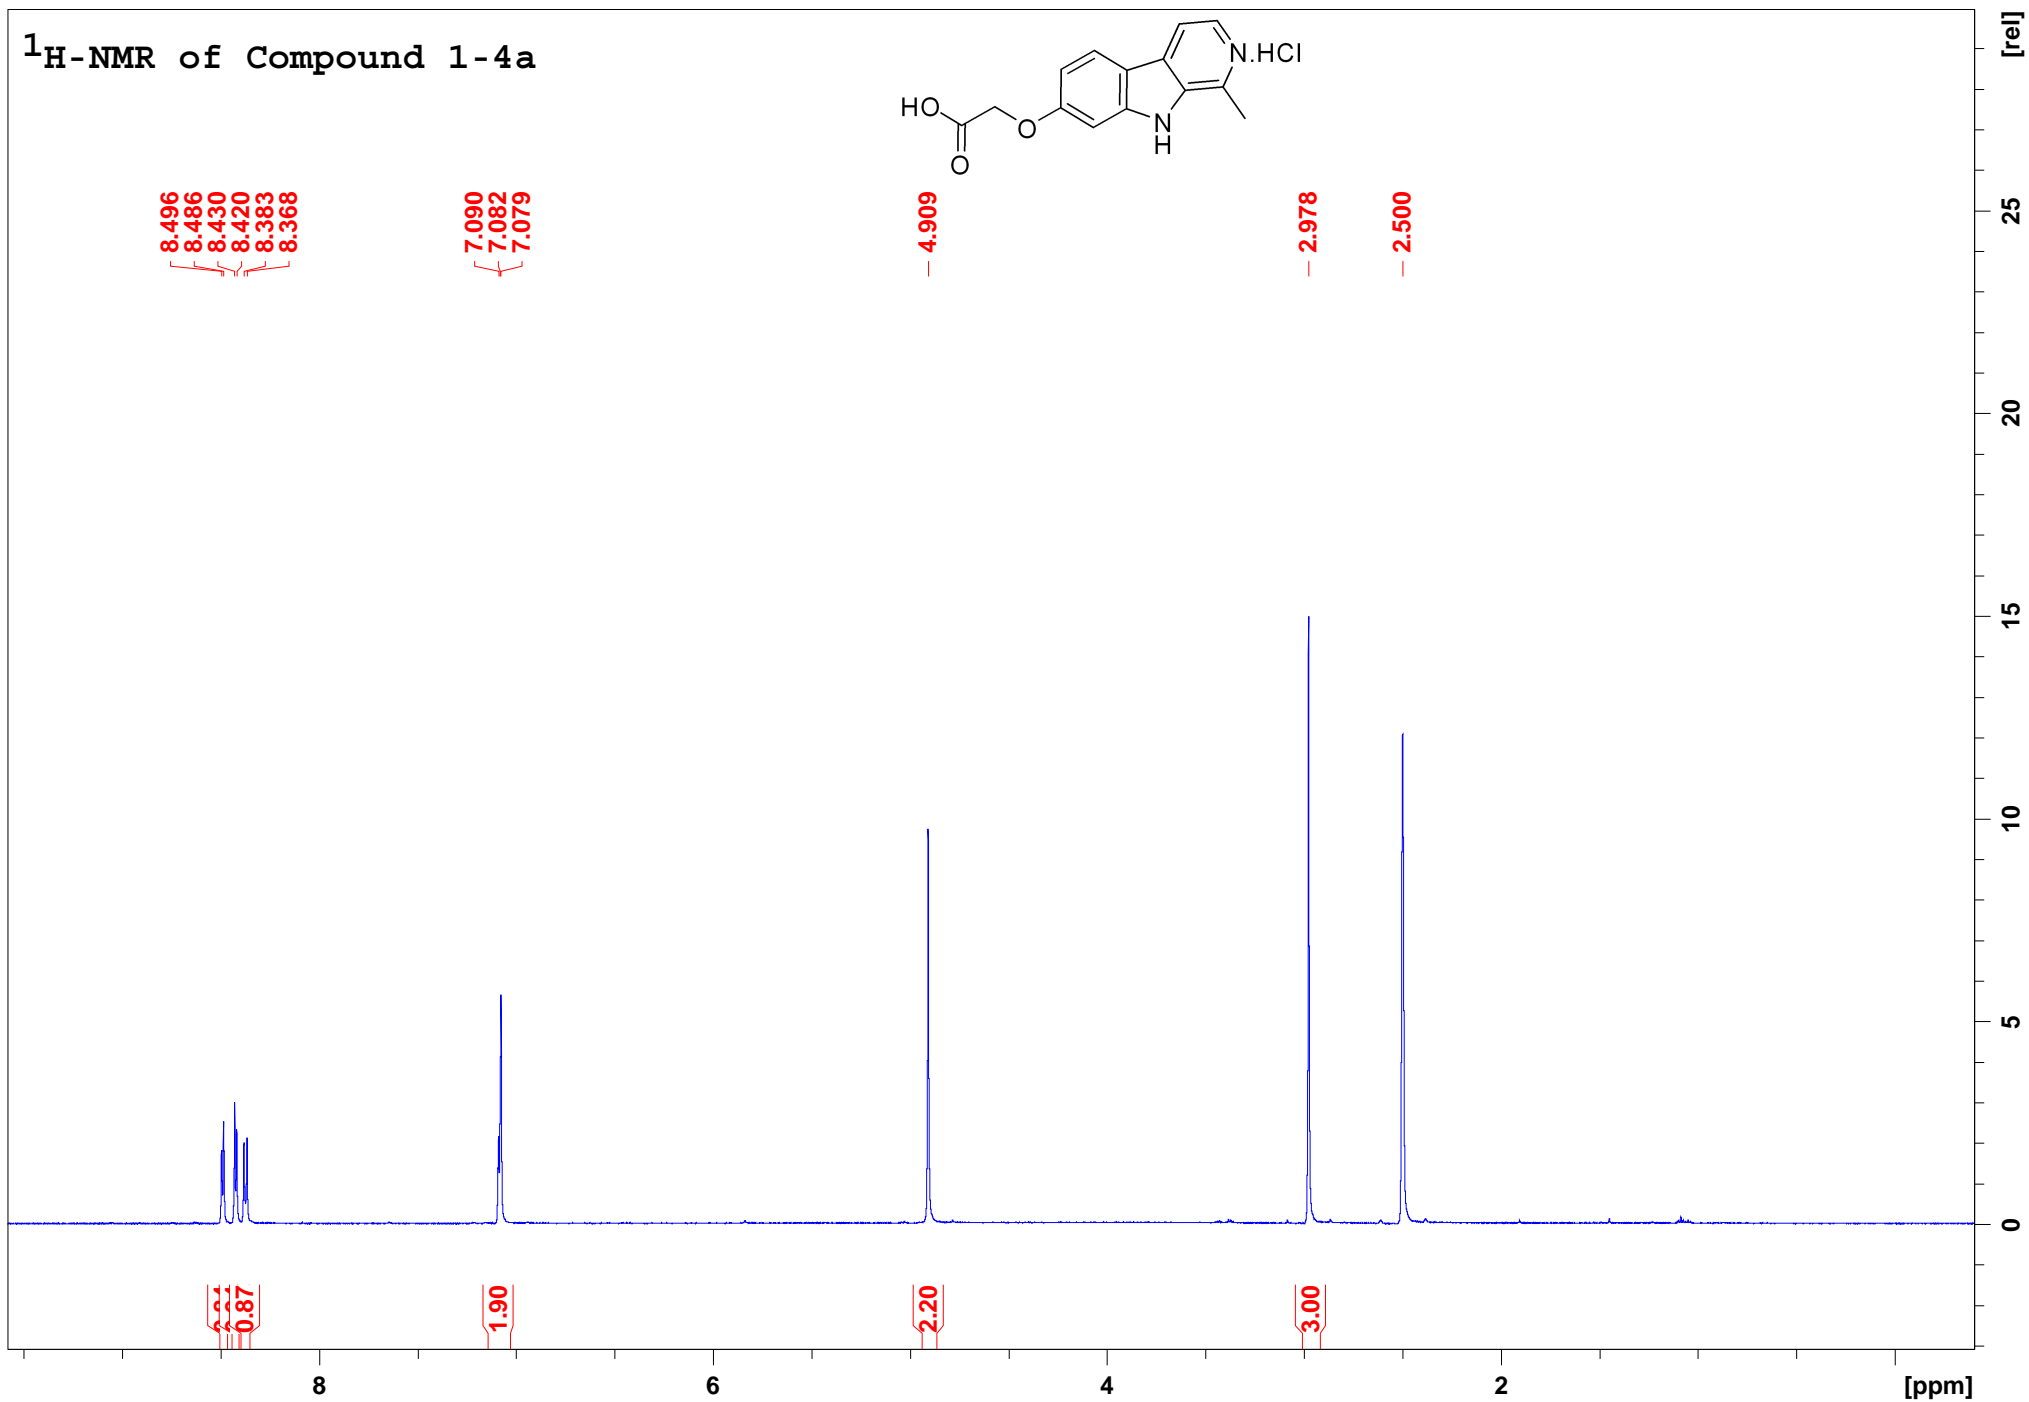

<sup>1</sup>H-NMR of Compound 1-4b

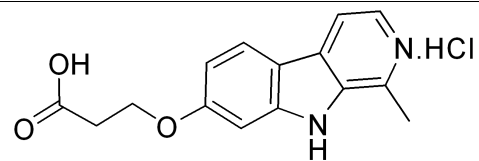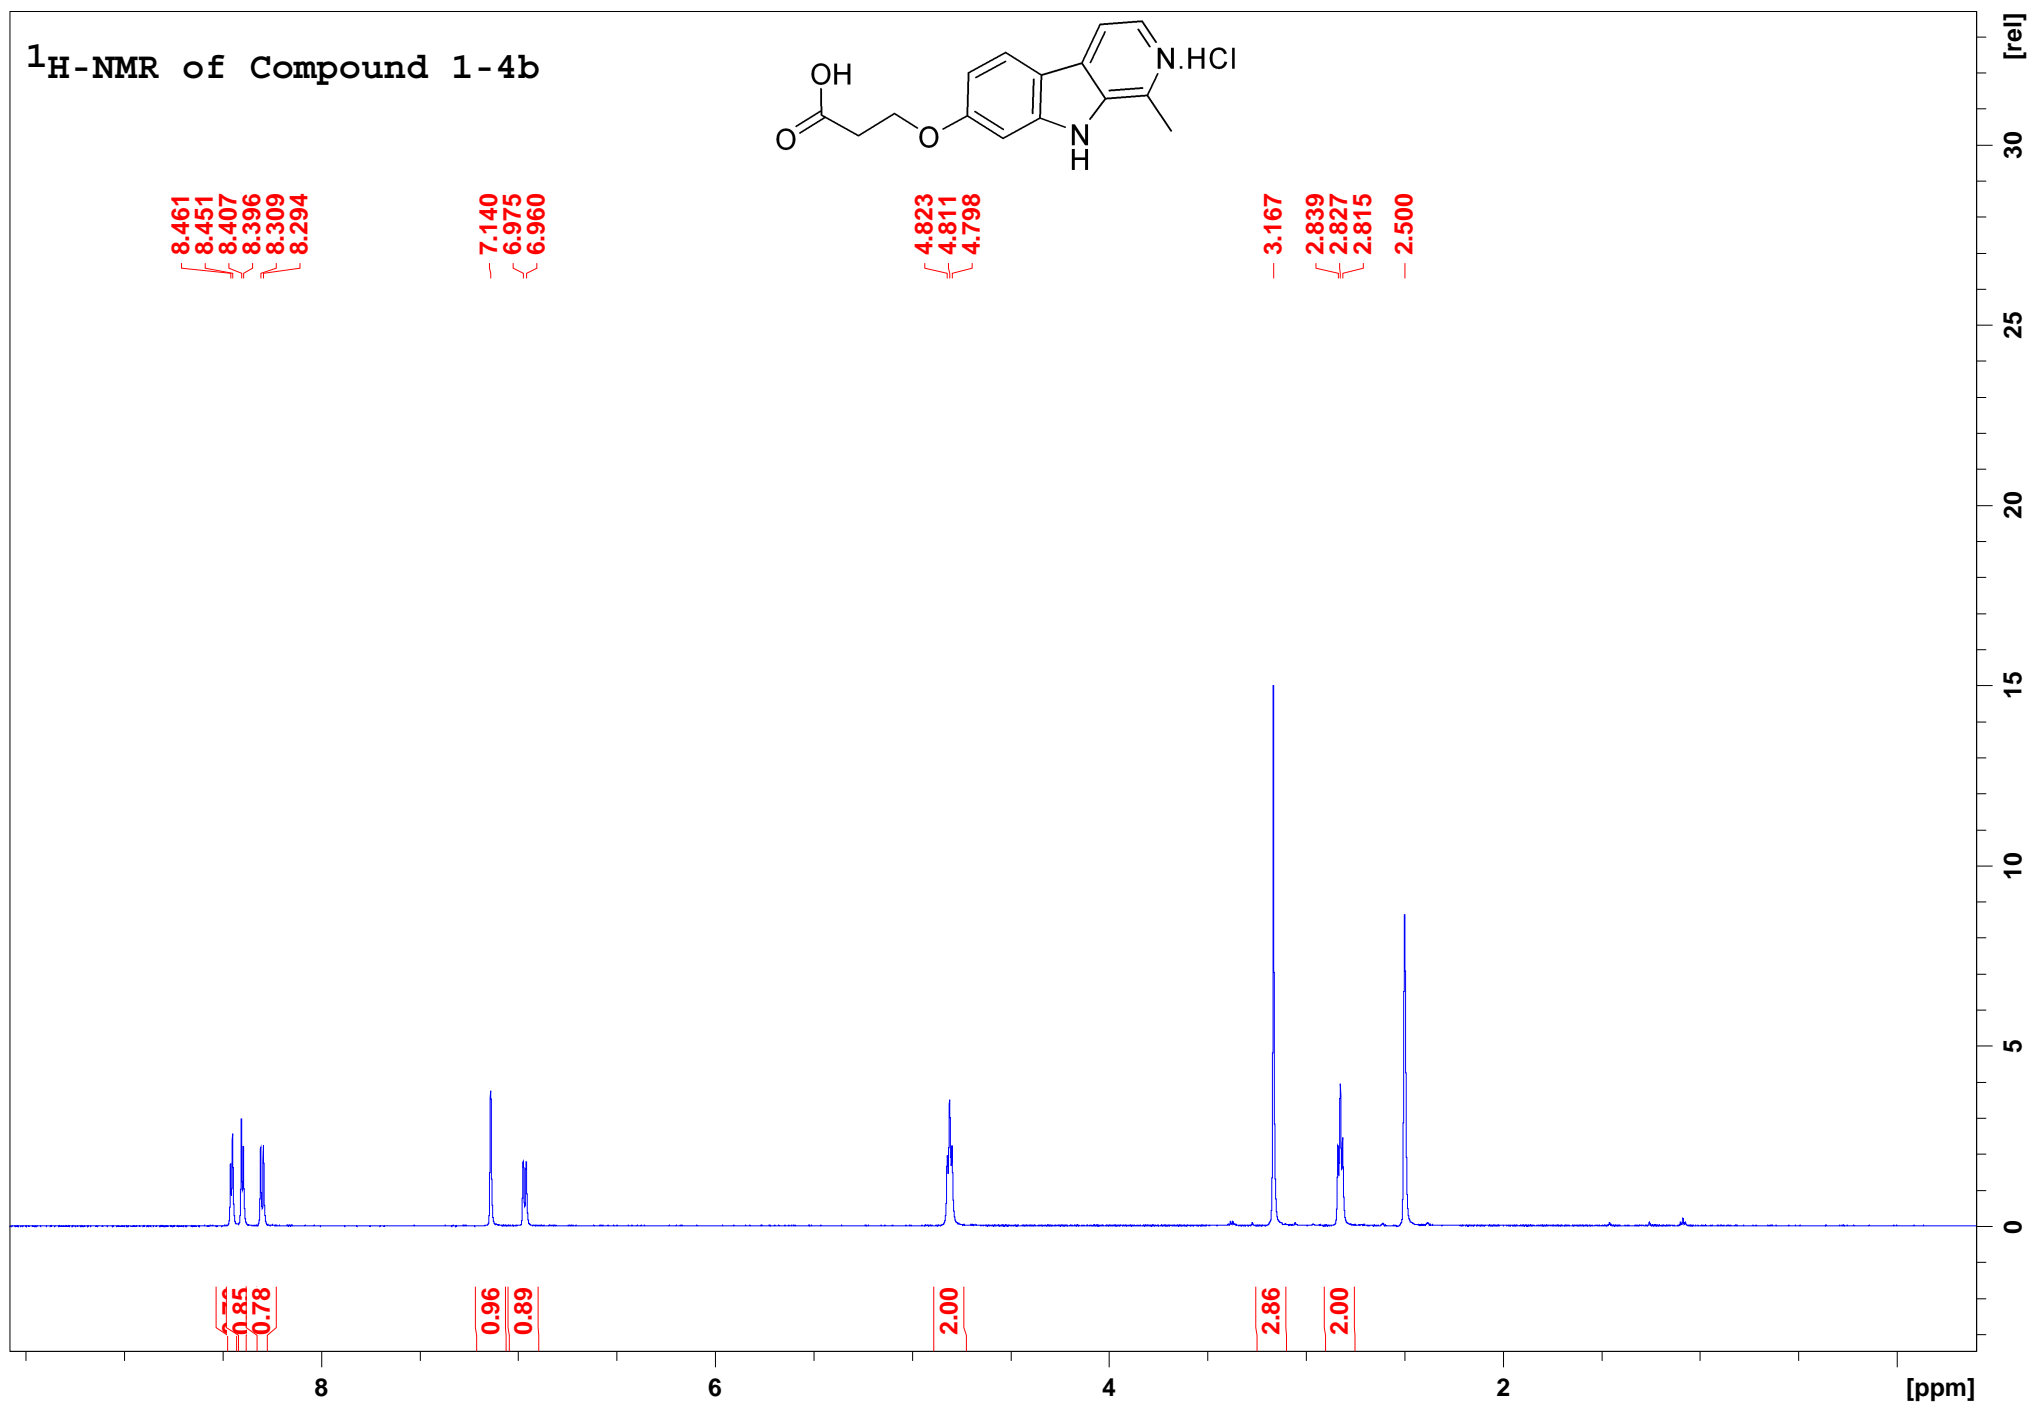



# <sup>1</sup>H-NMR of Compound 1-4c

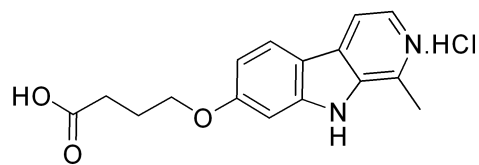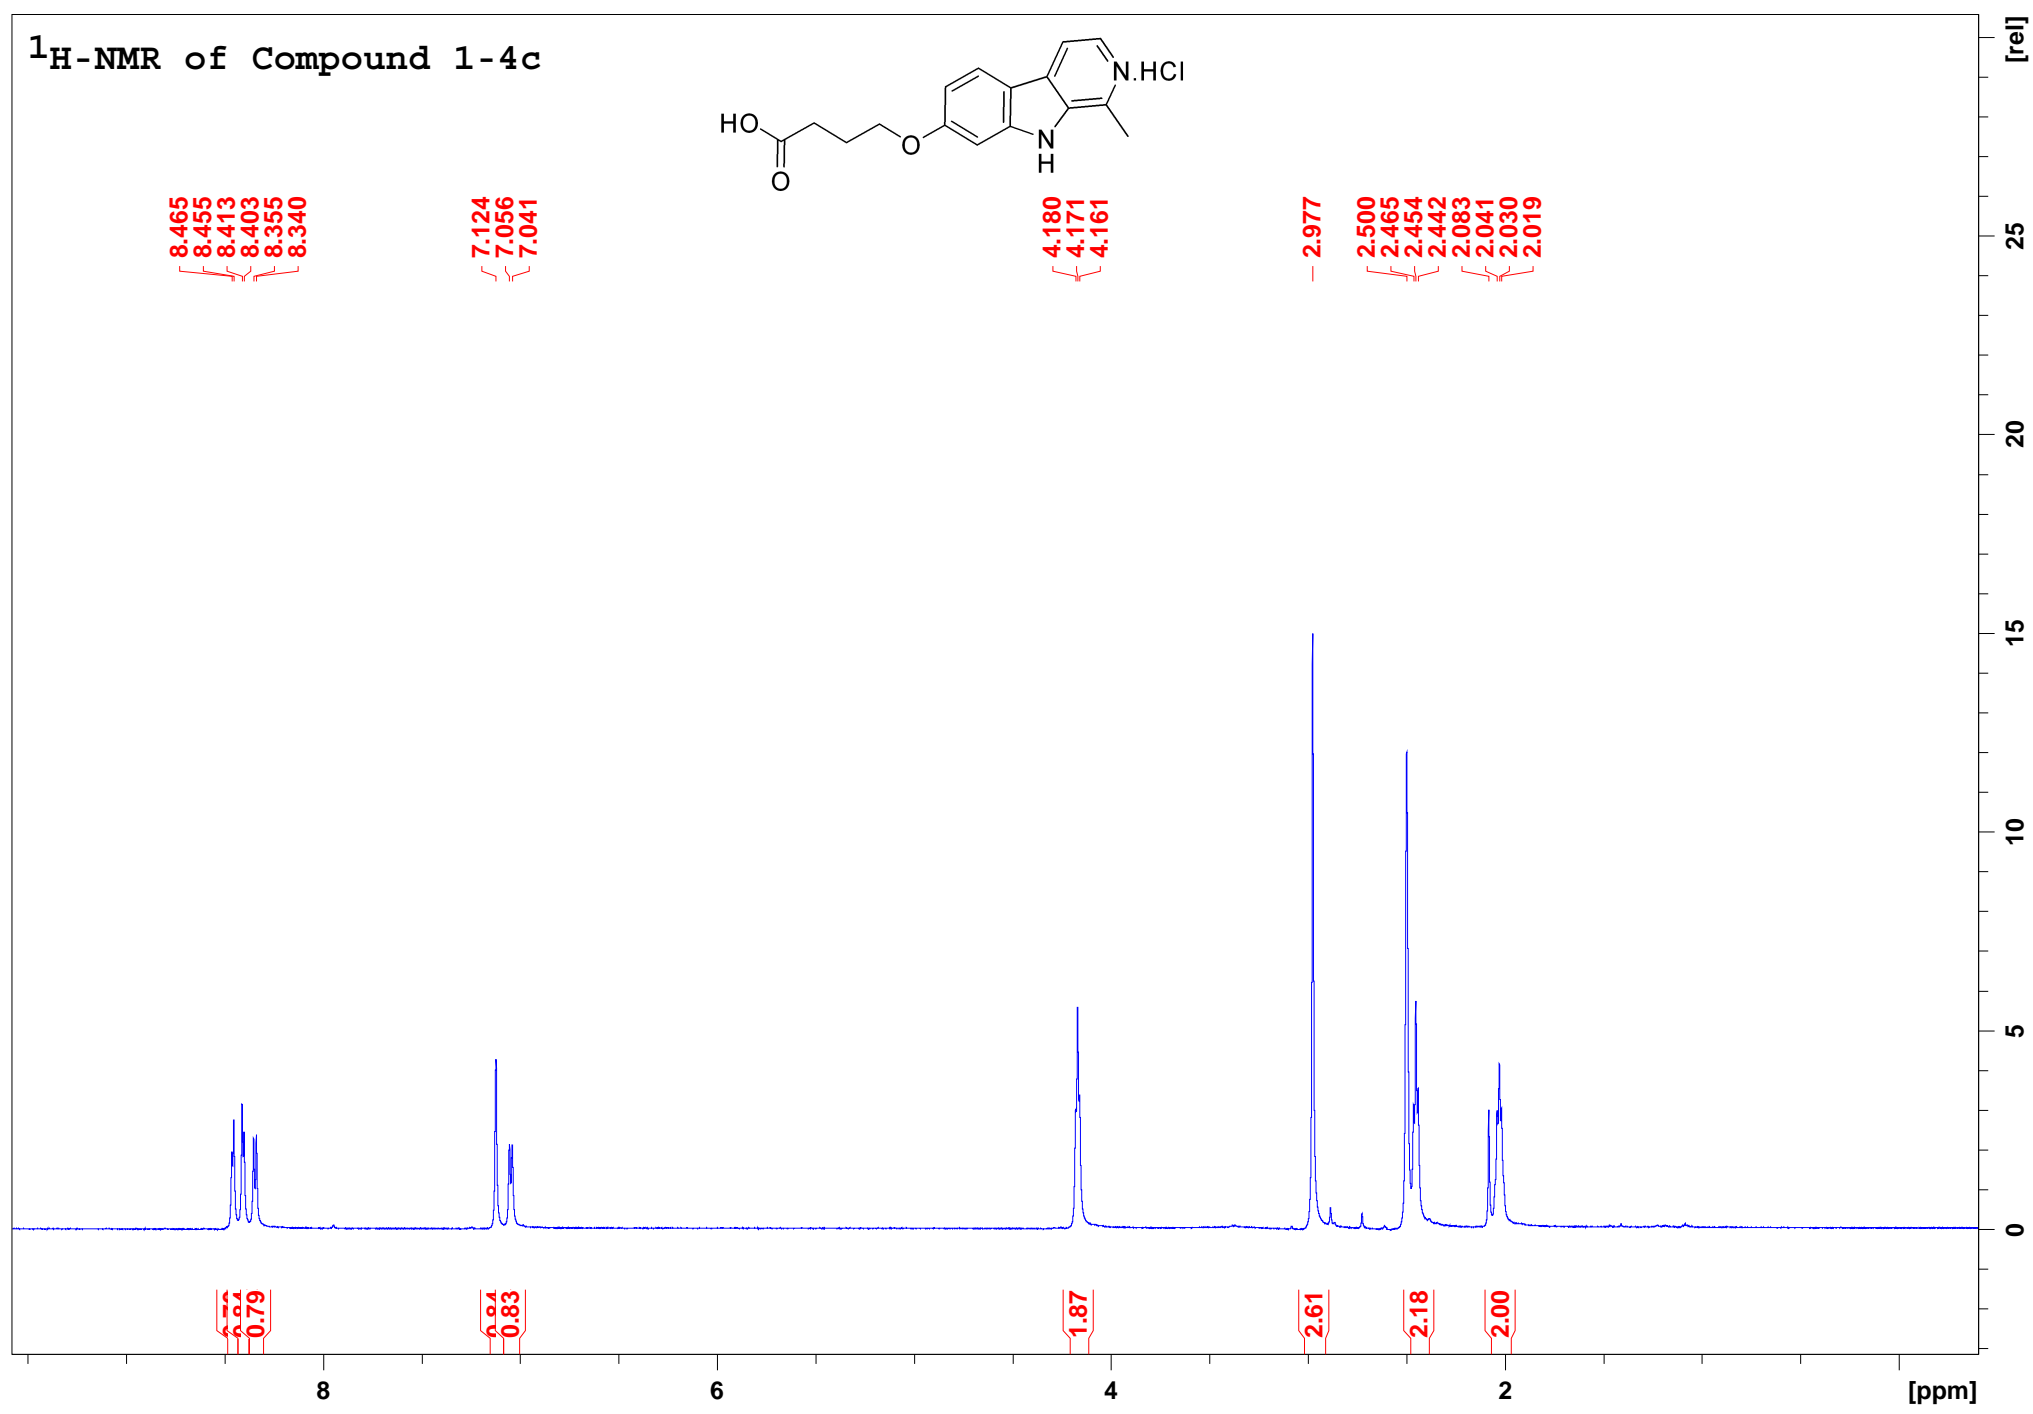

<sup>1</sup>H-NMR of Compound 1-4d

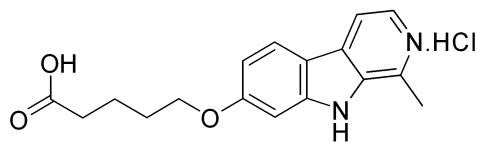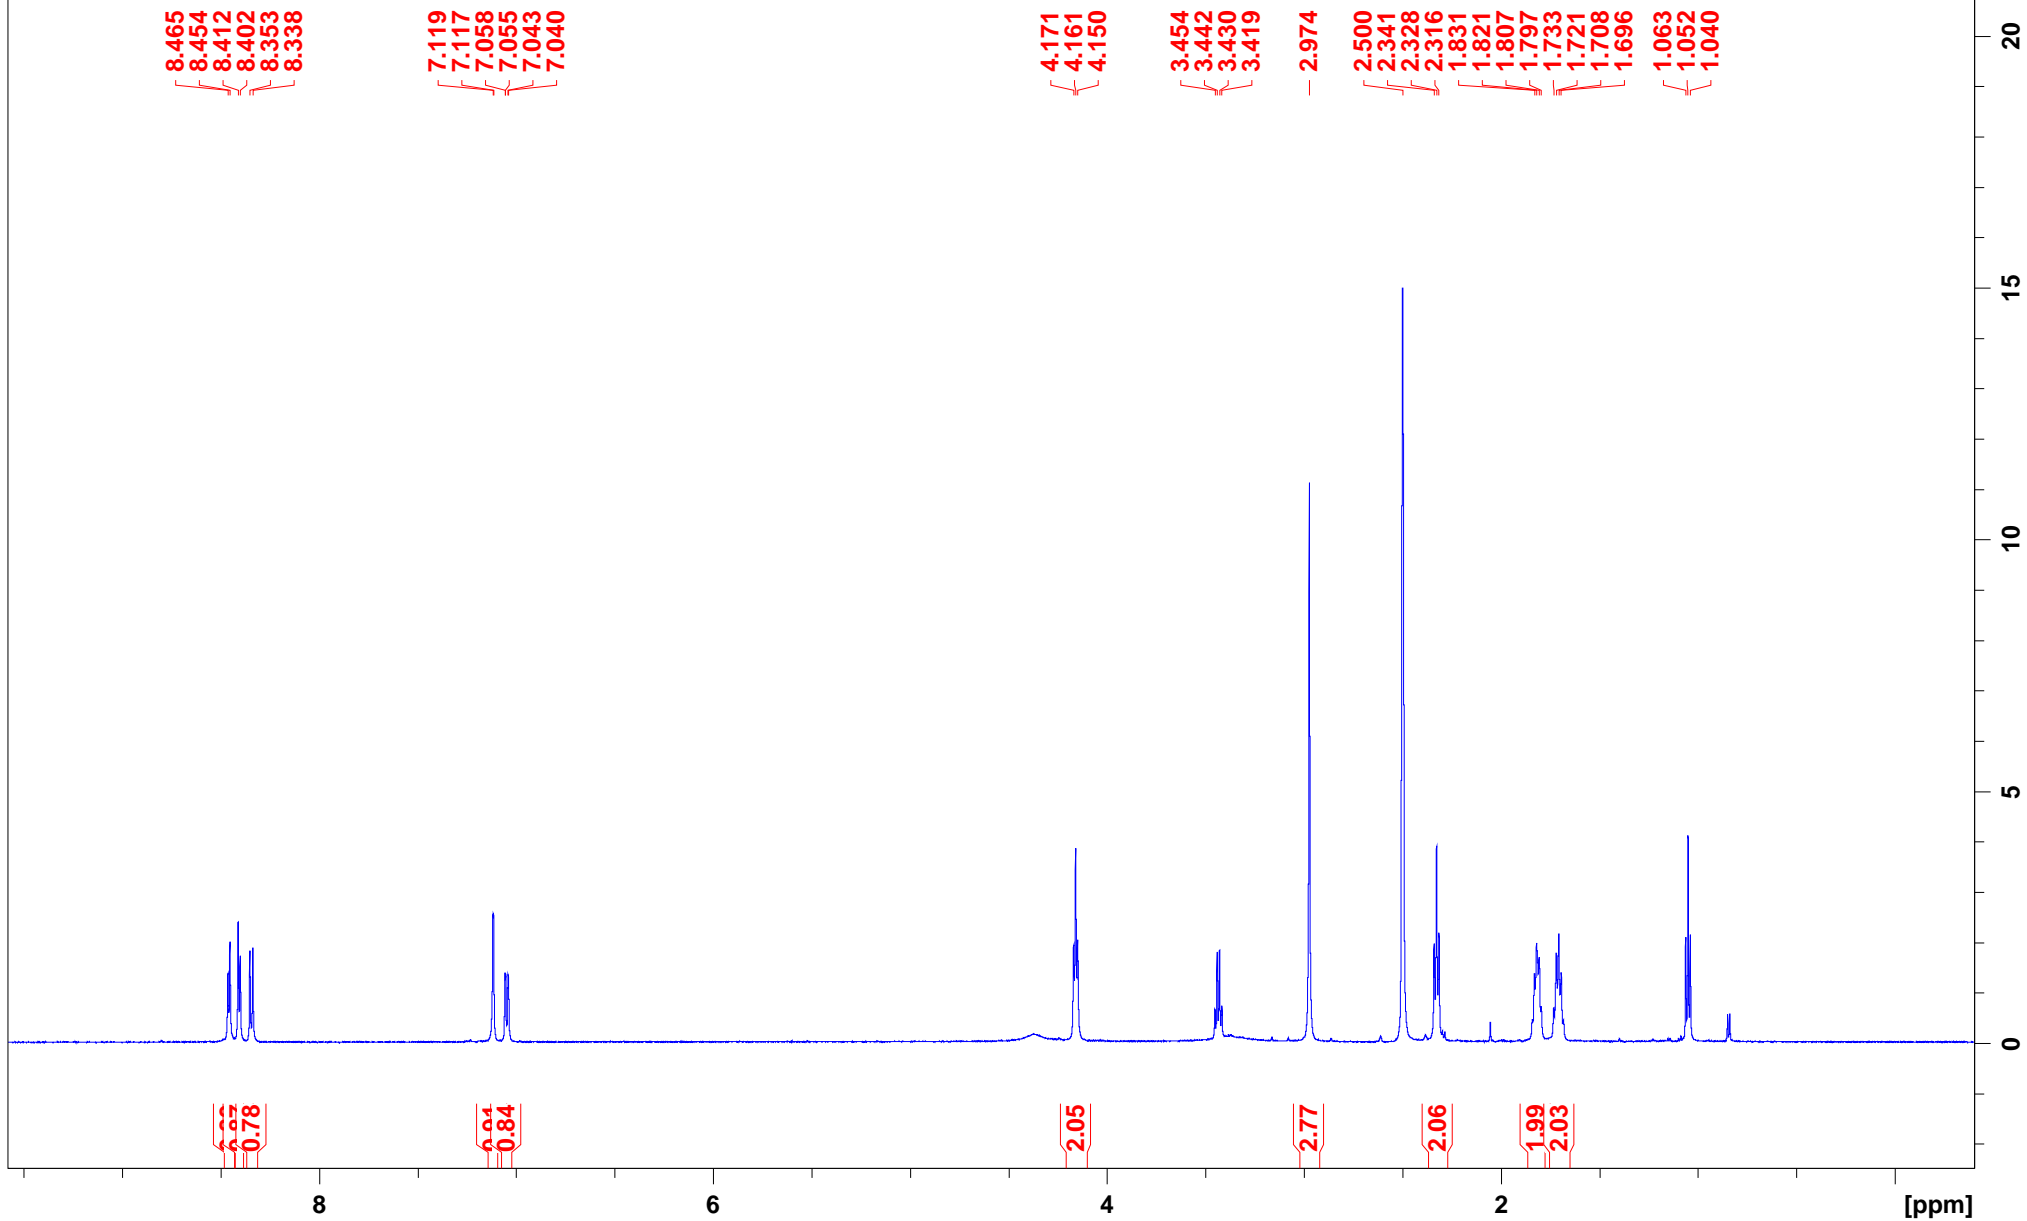

# <sup>1</sup>H-NMR of Compound 1-4e

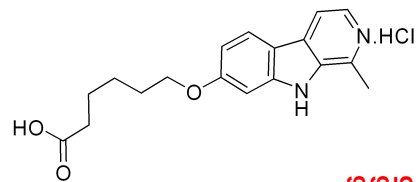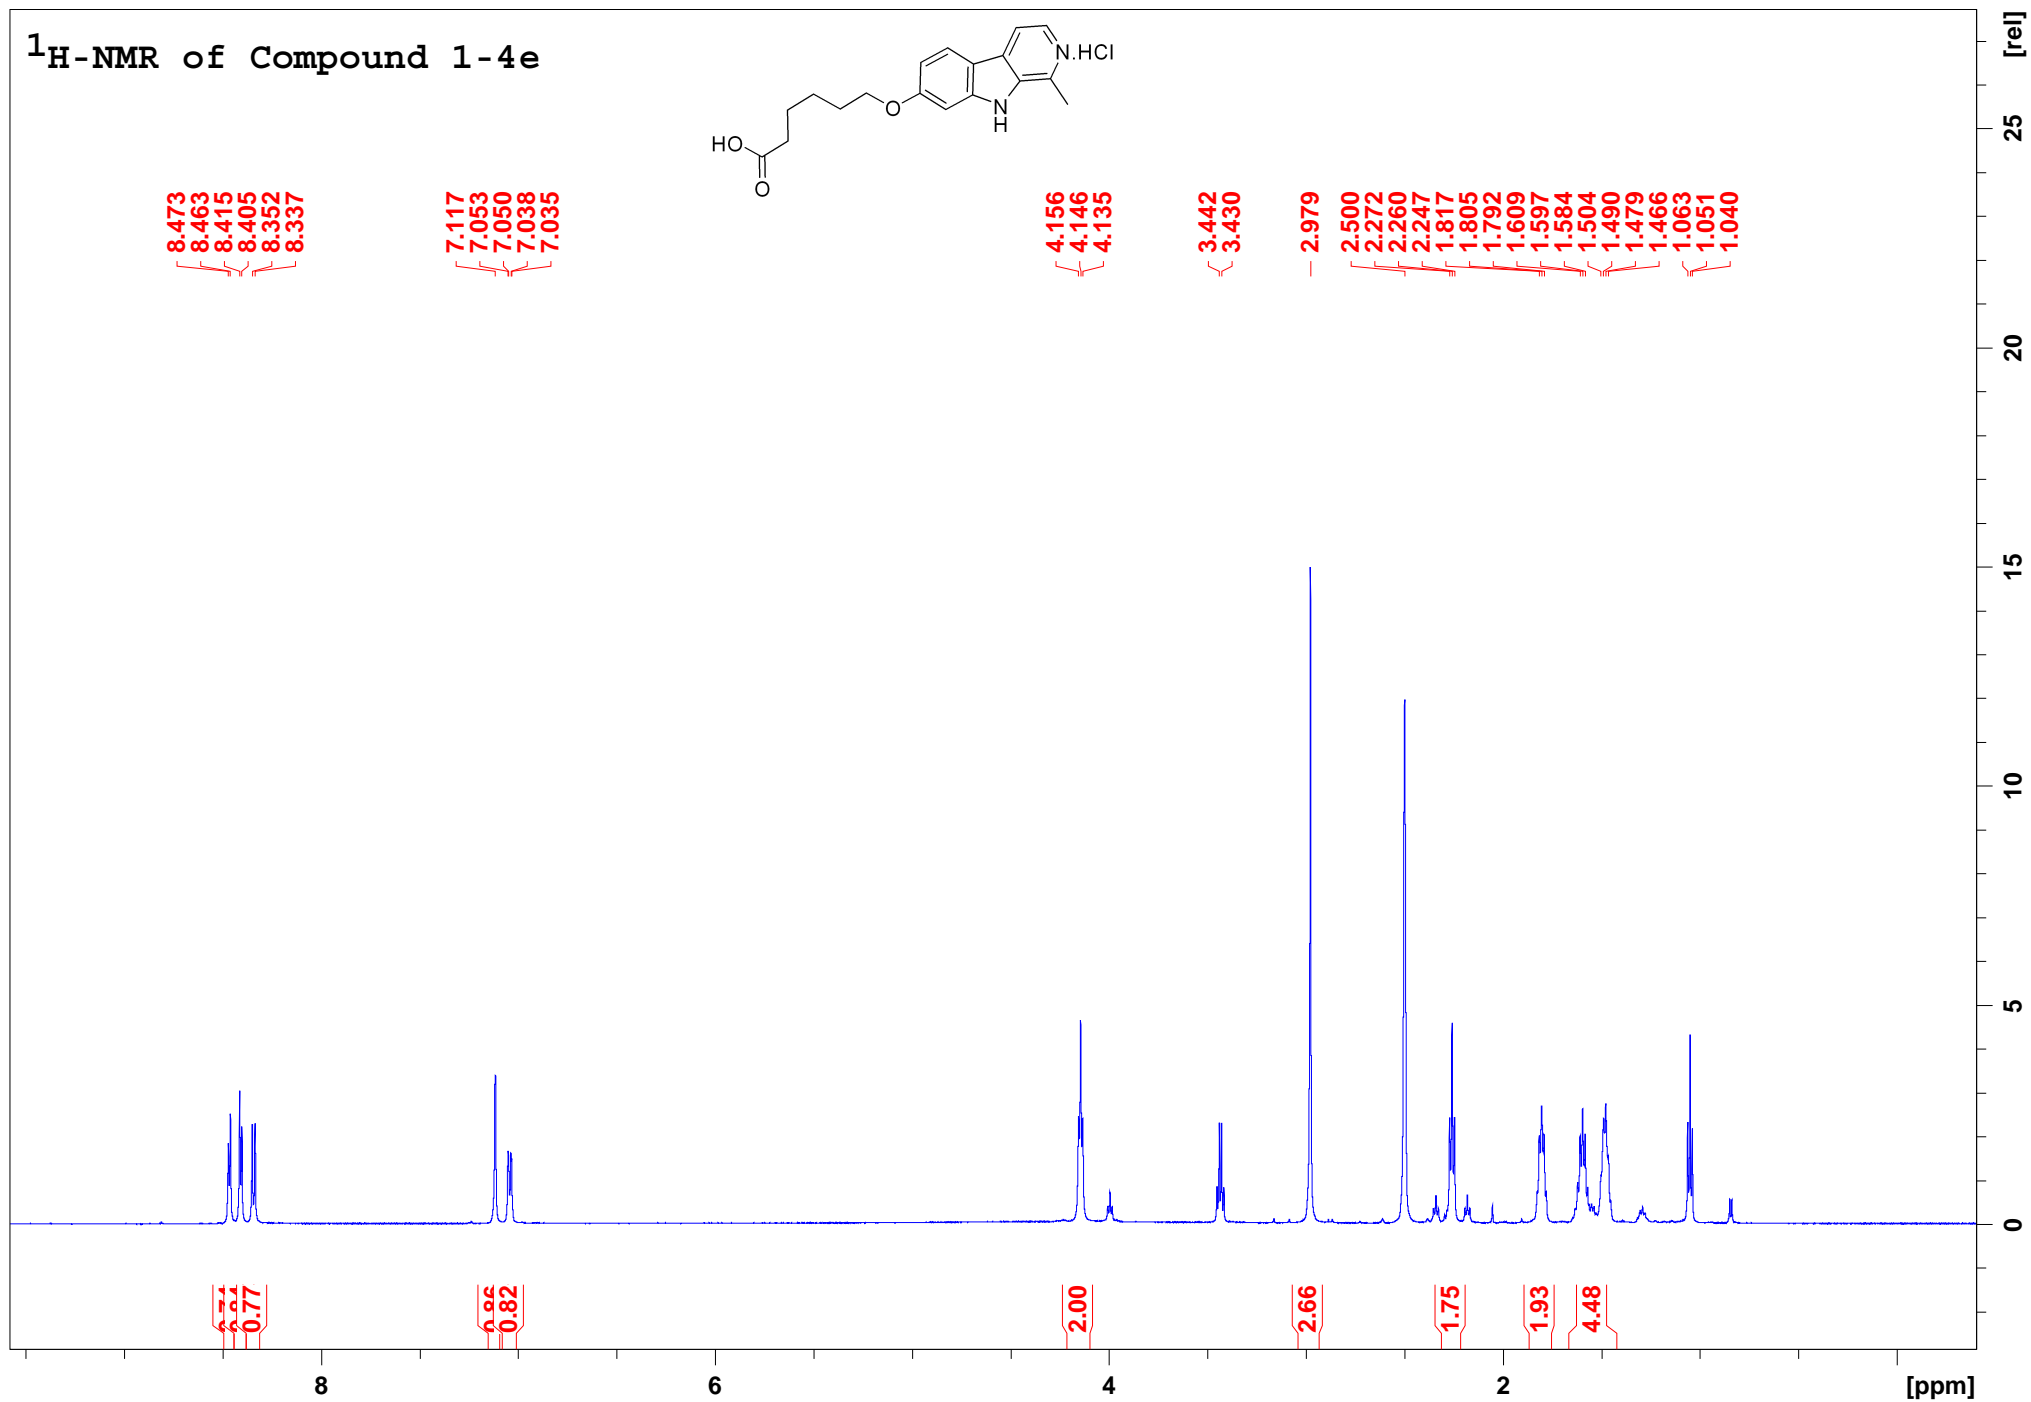

# <sup>1</sup>H-NMR of Compound 1-5a

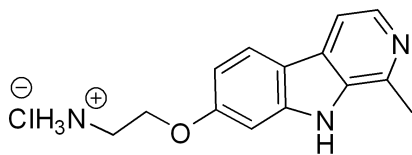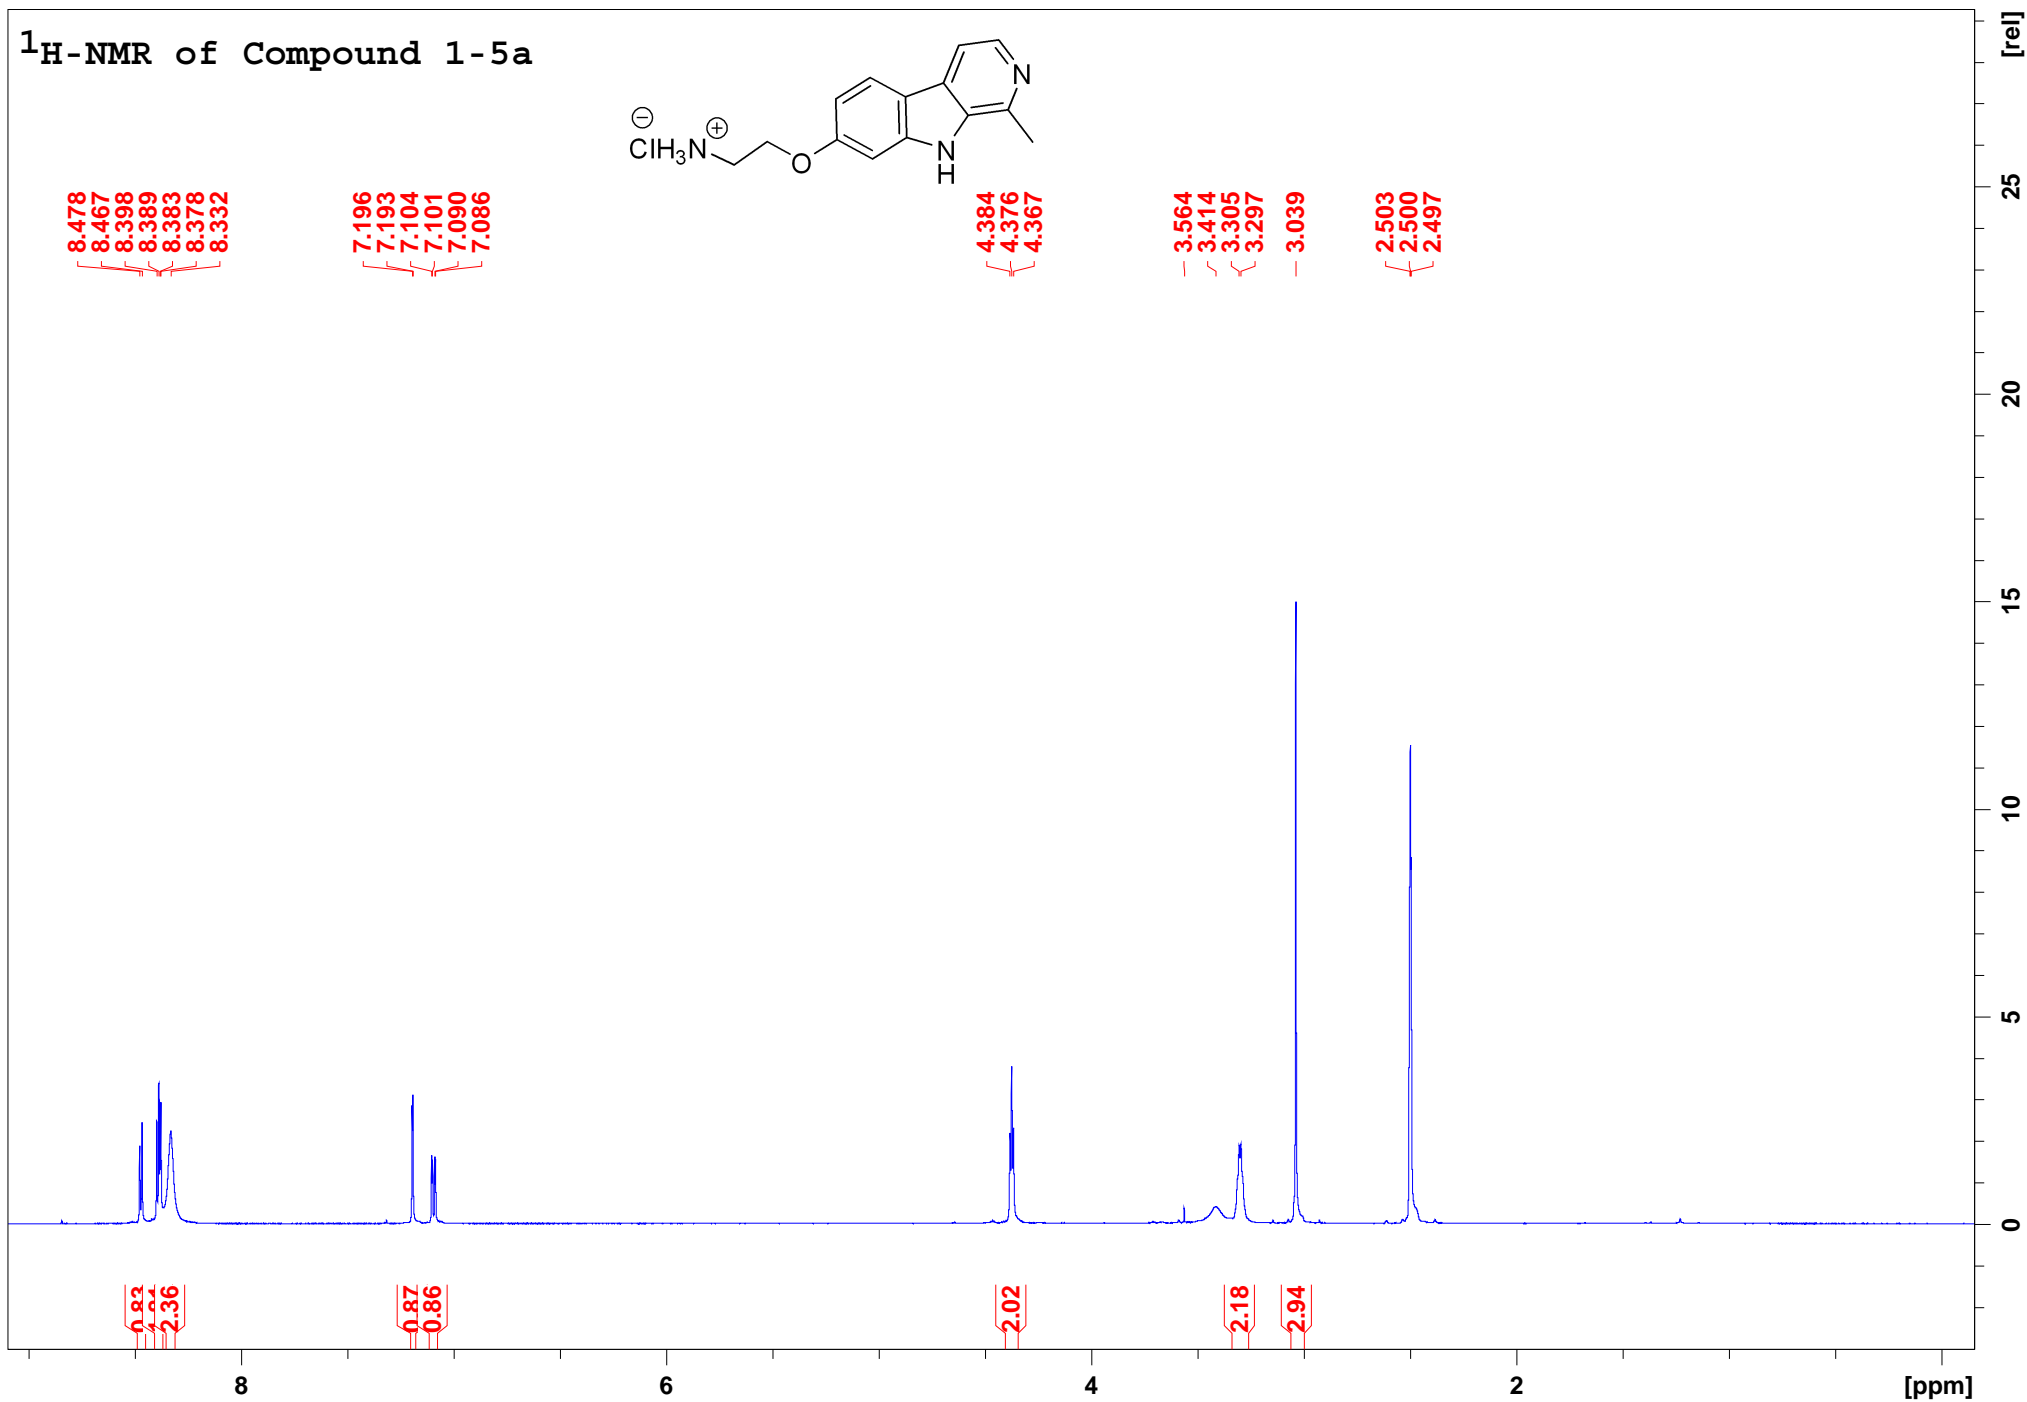

<sup>1</sup>H-NMR of Compound 1-5b

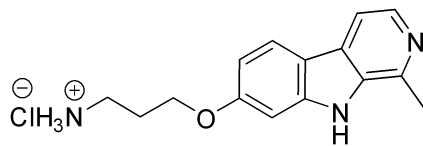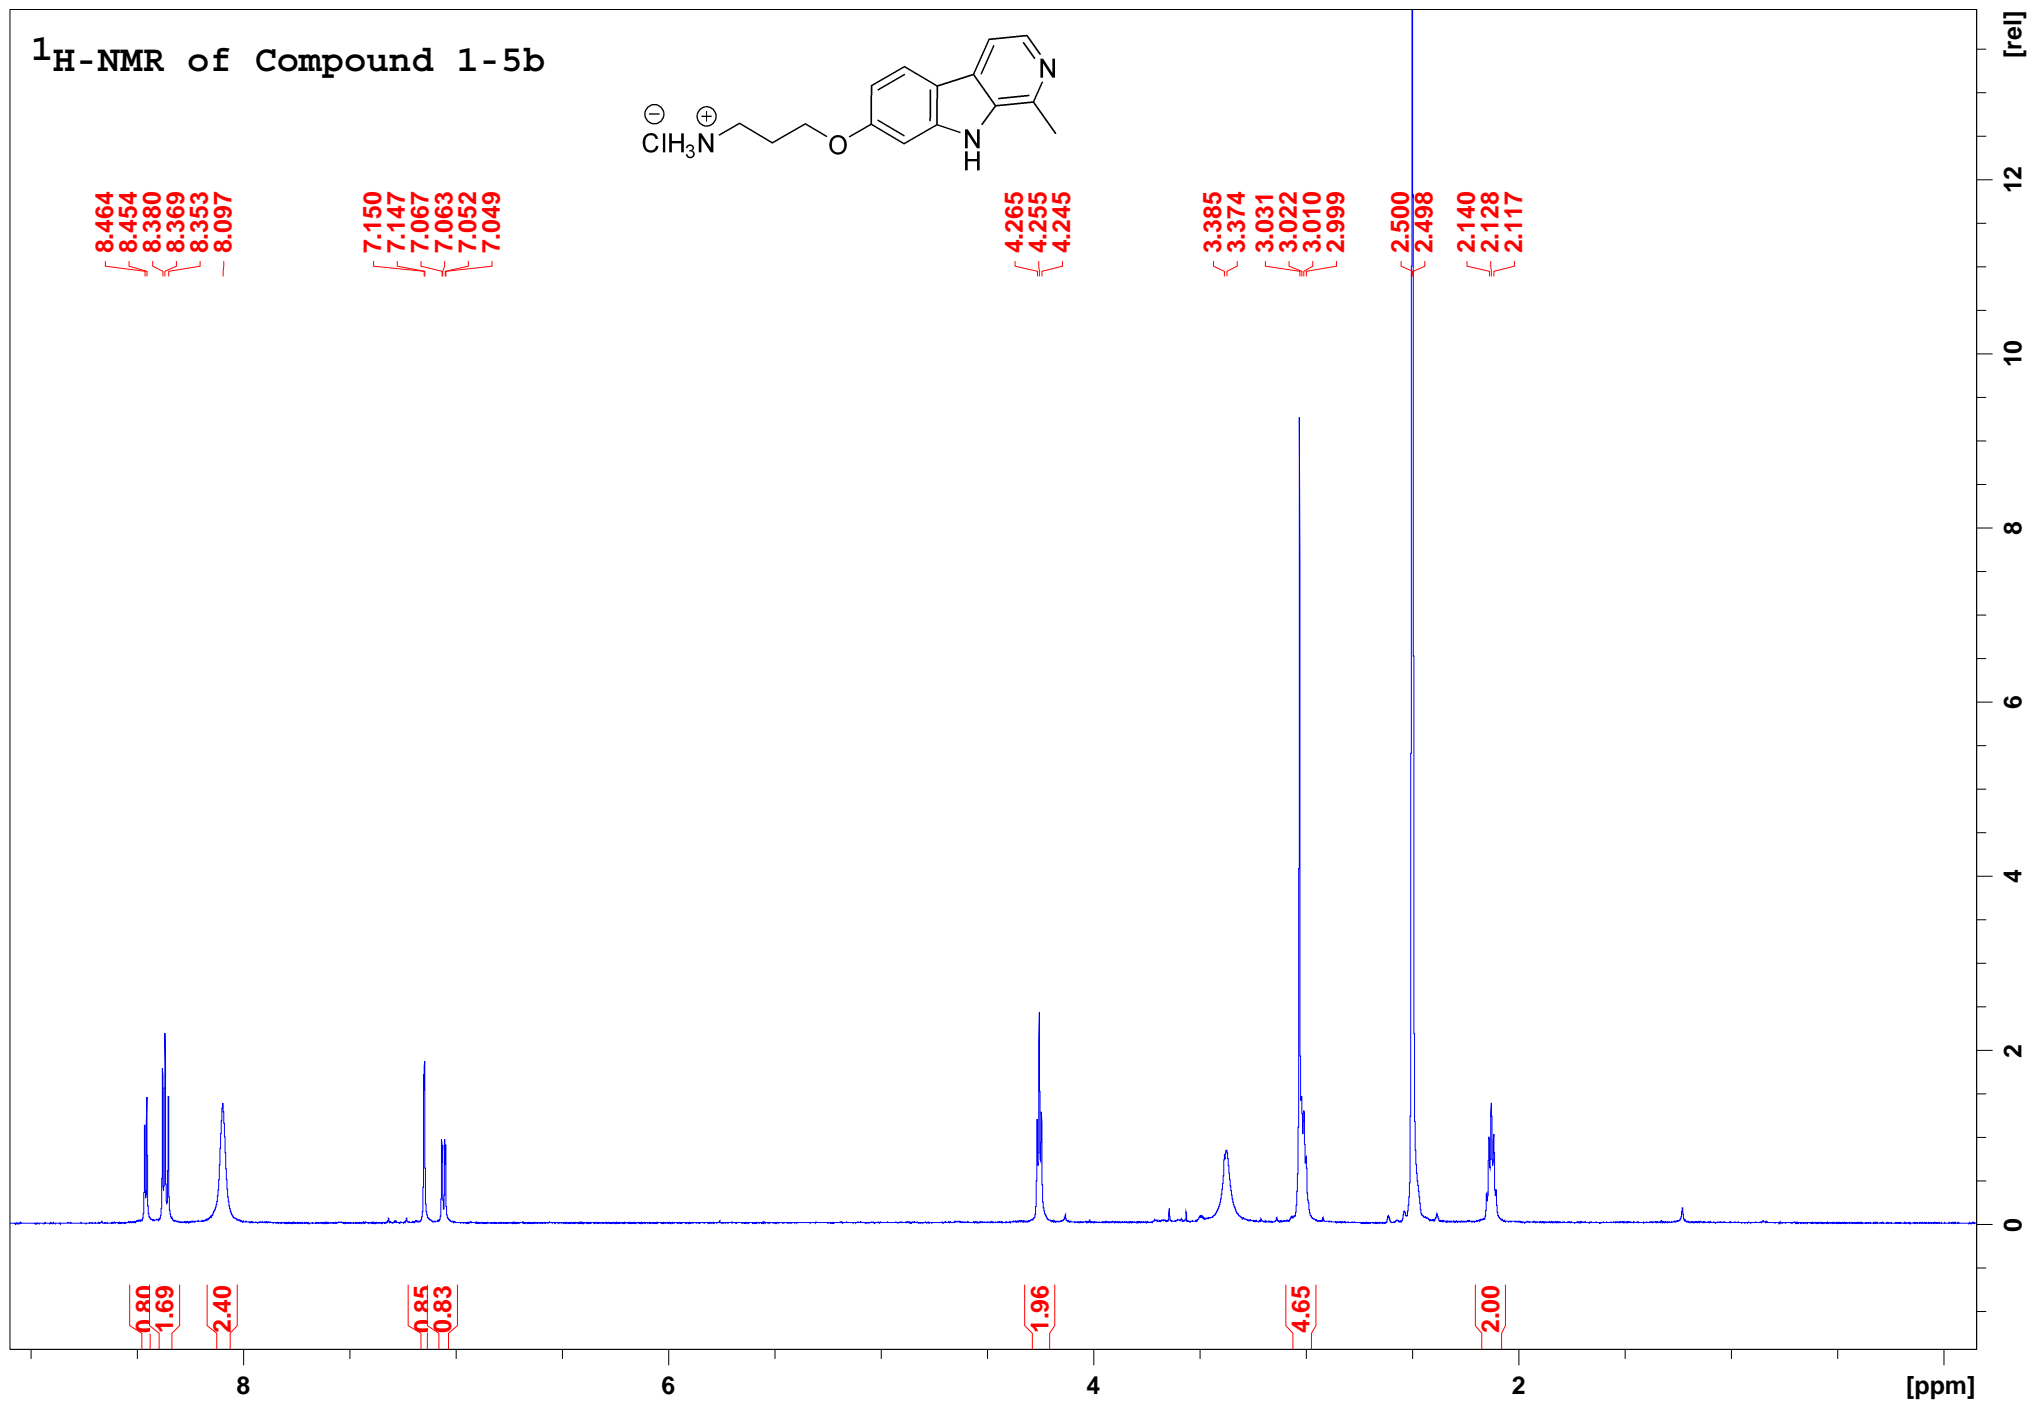

<sup>1</sup>H-NMR of Compound 1-5c

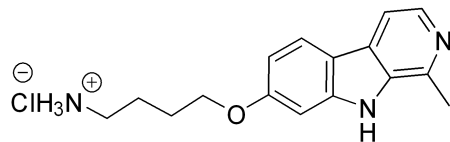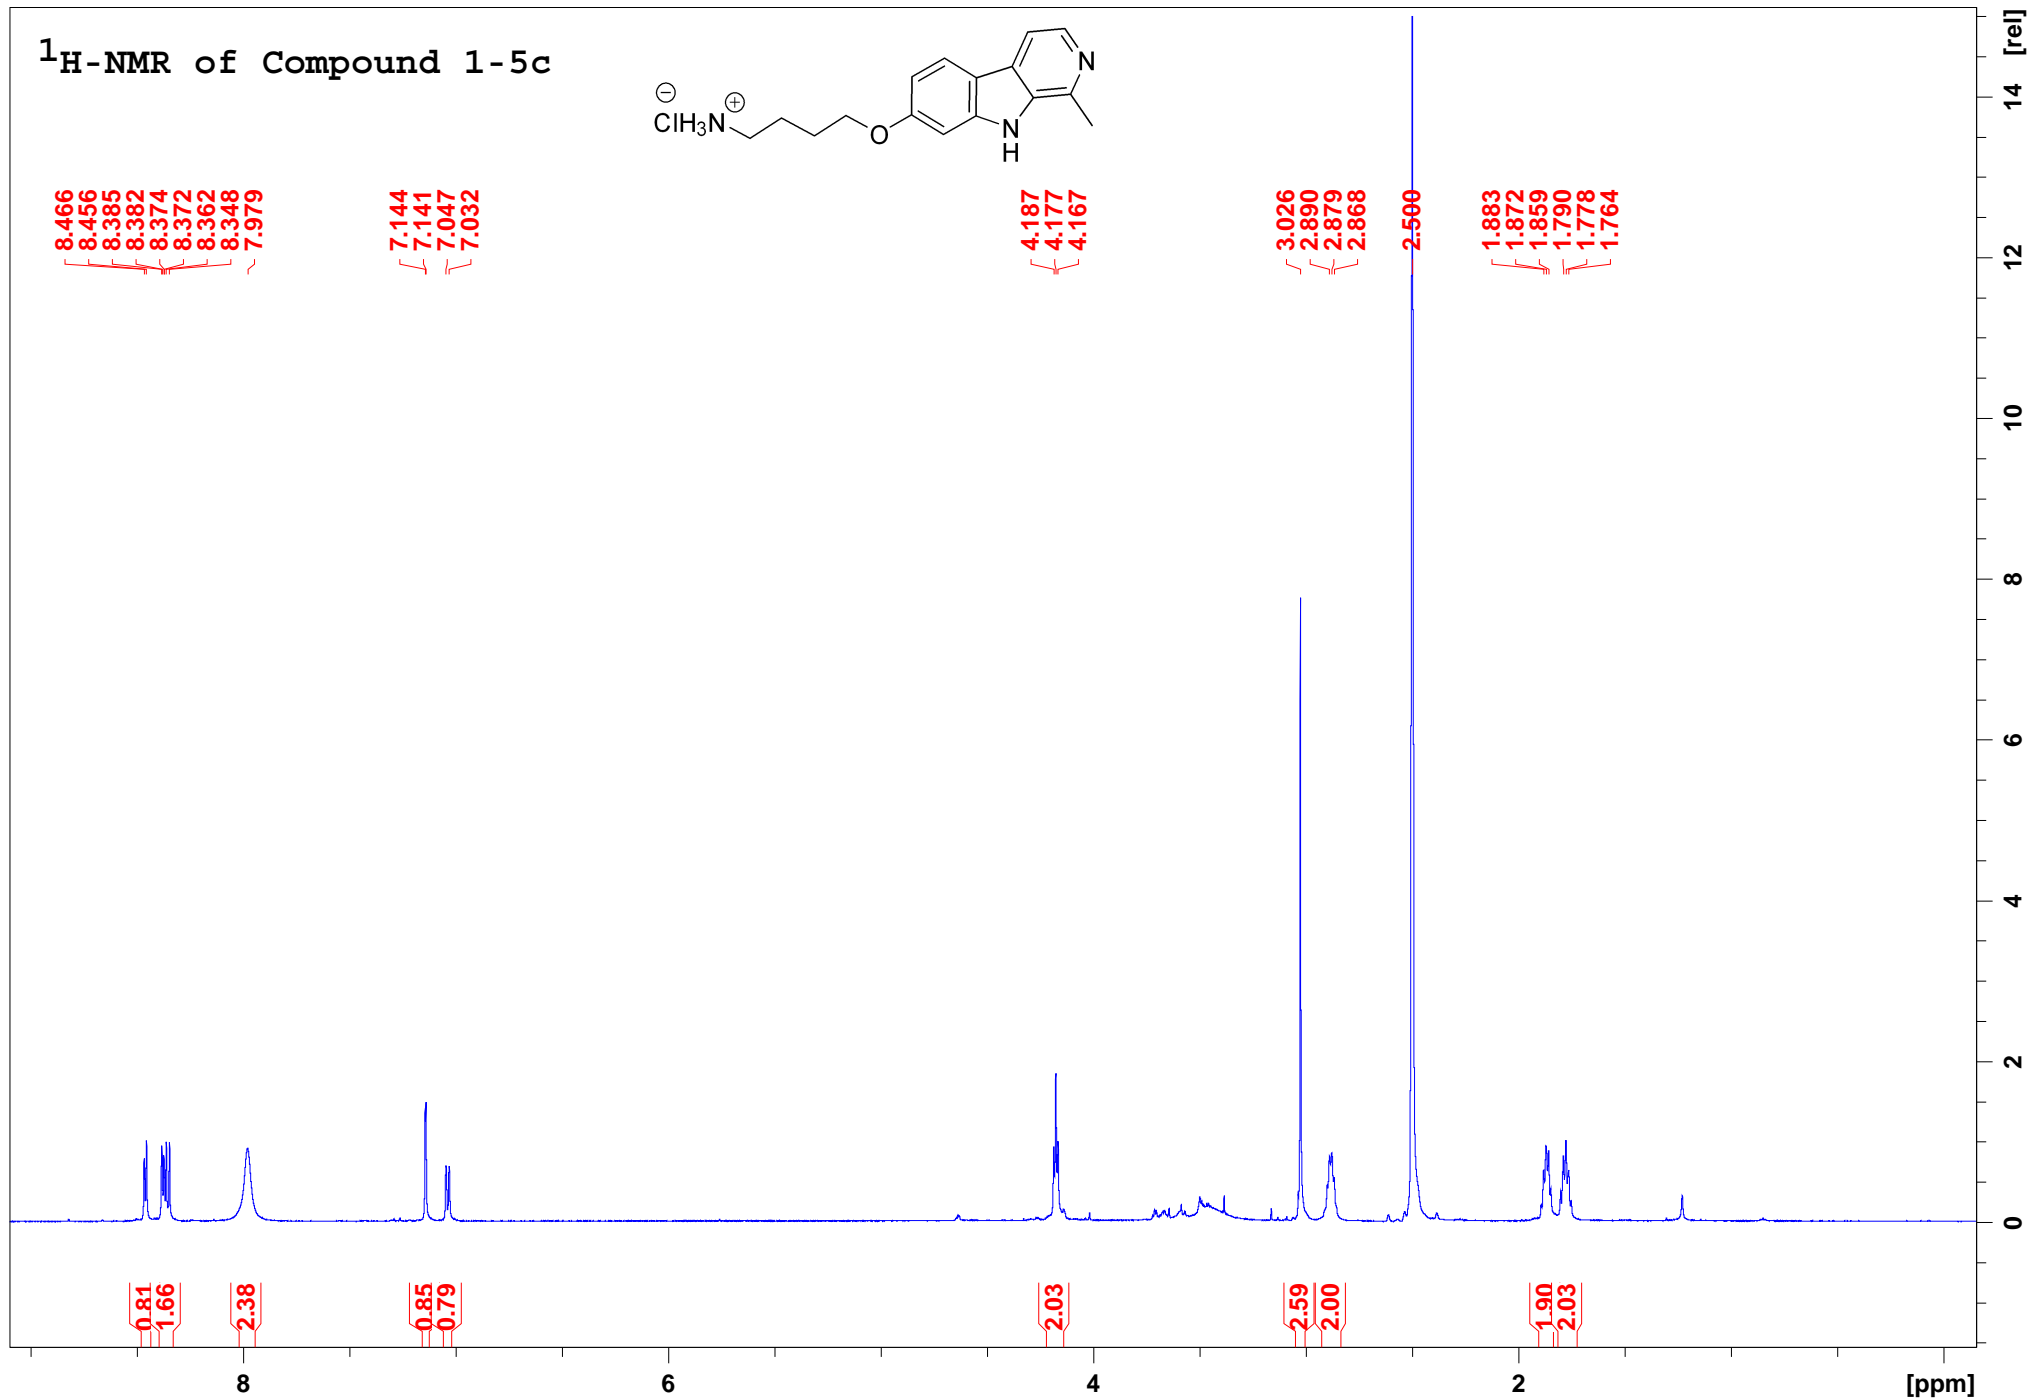

# $^1\text{H-NMR}$ of Compound 1-5d

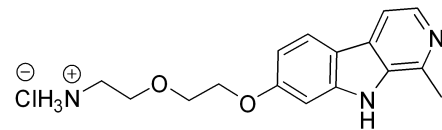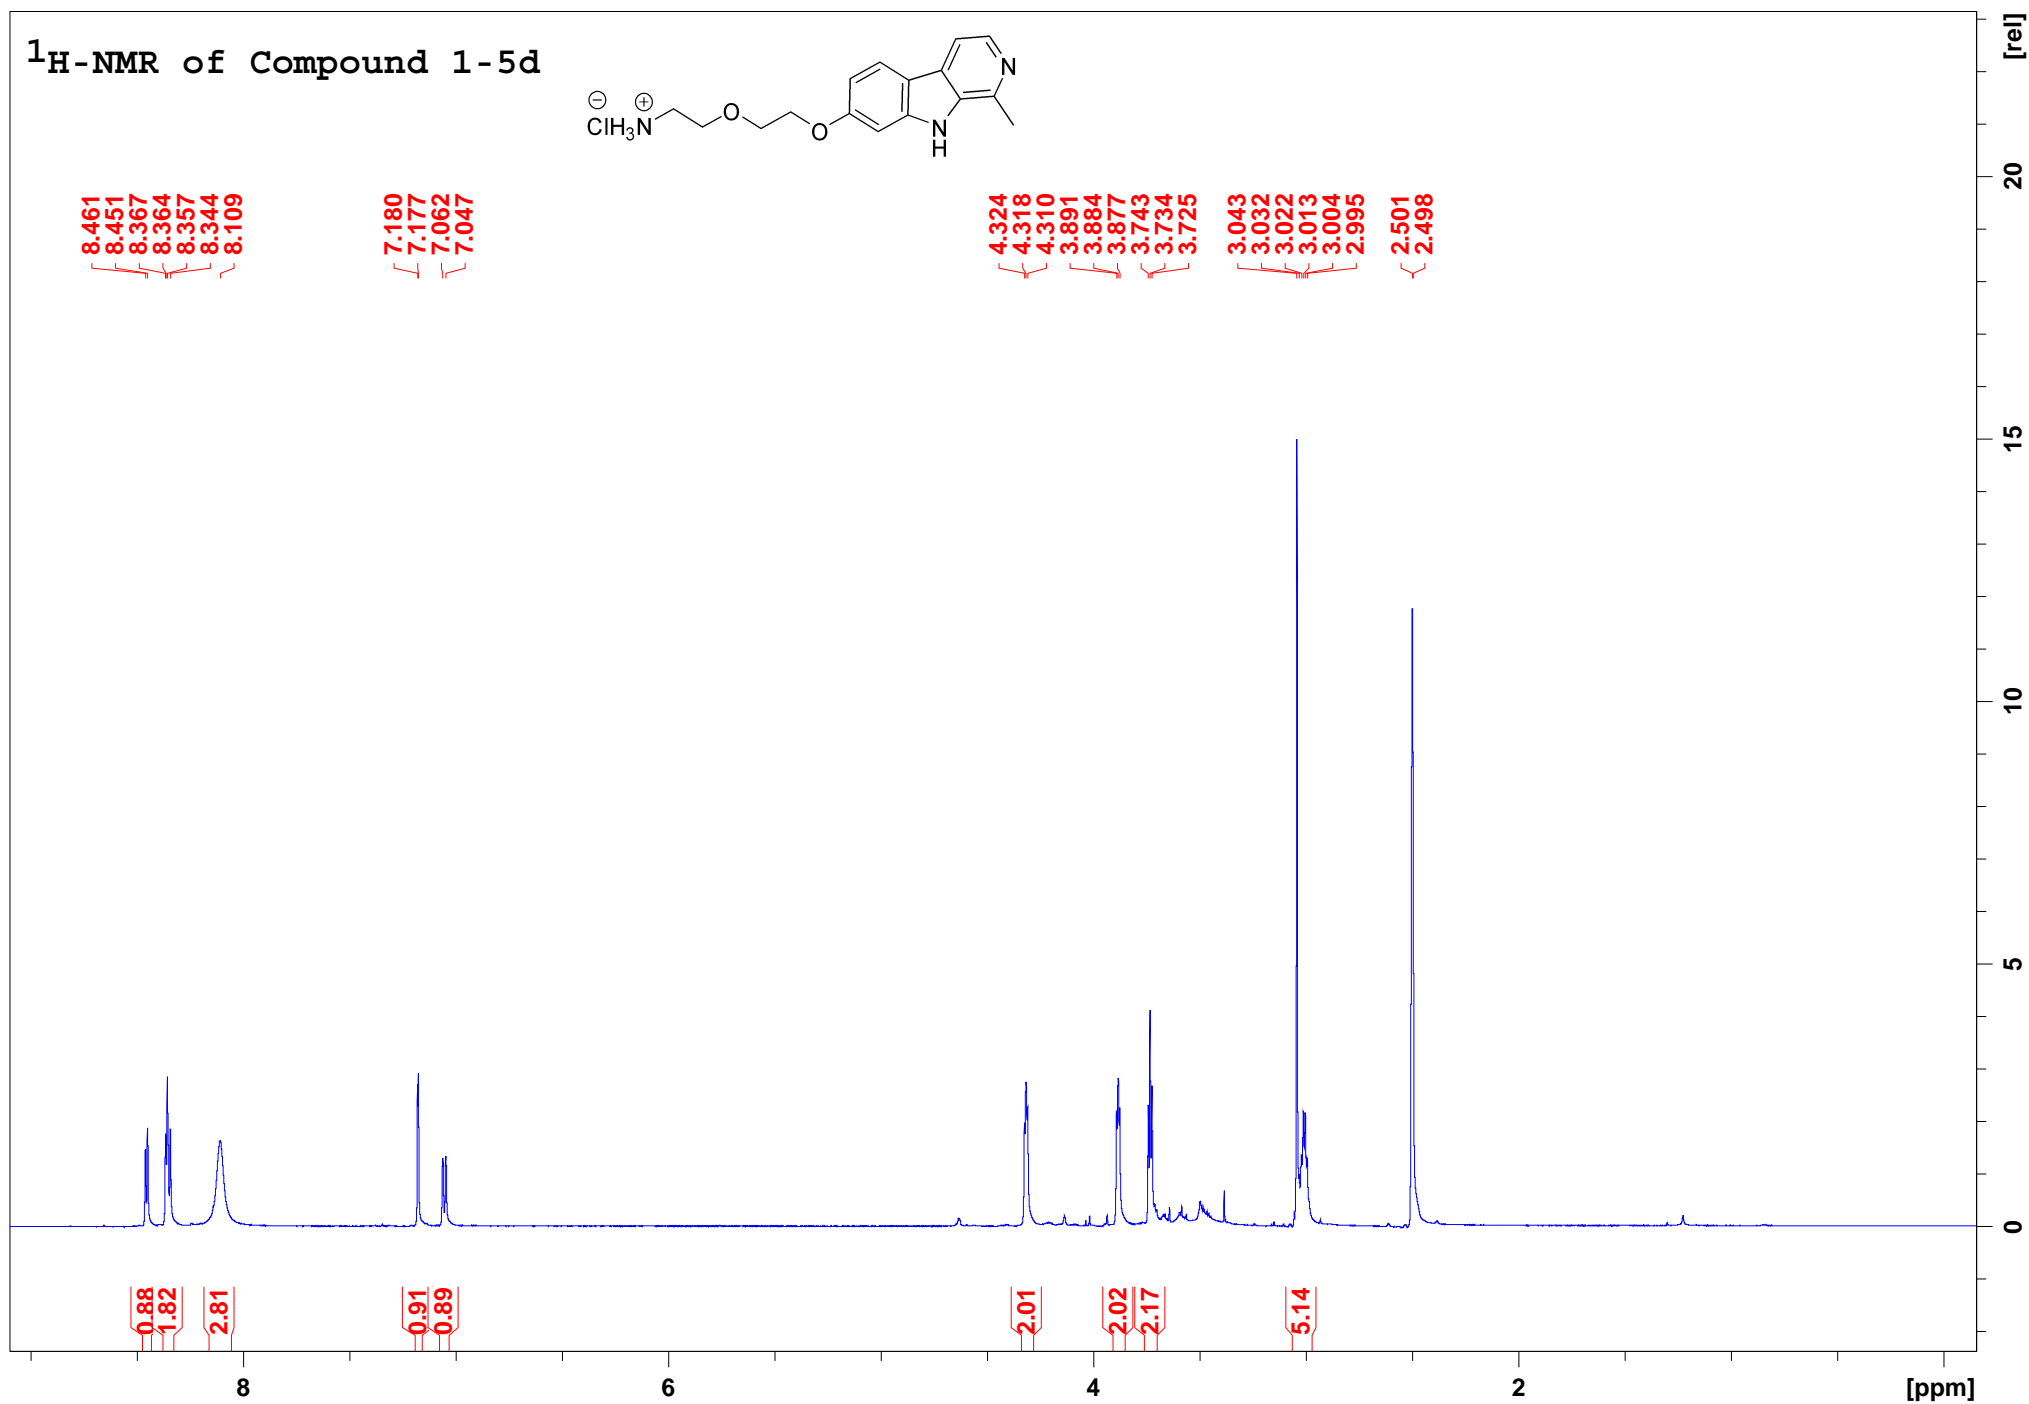

<sup>1</sup>H-NMR of Compound 1-6a

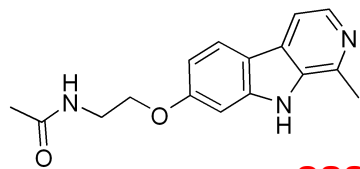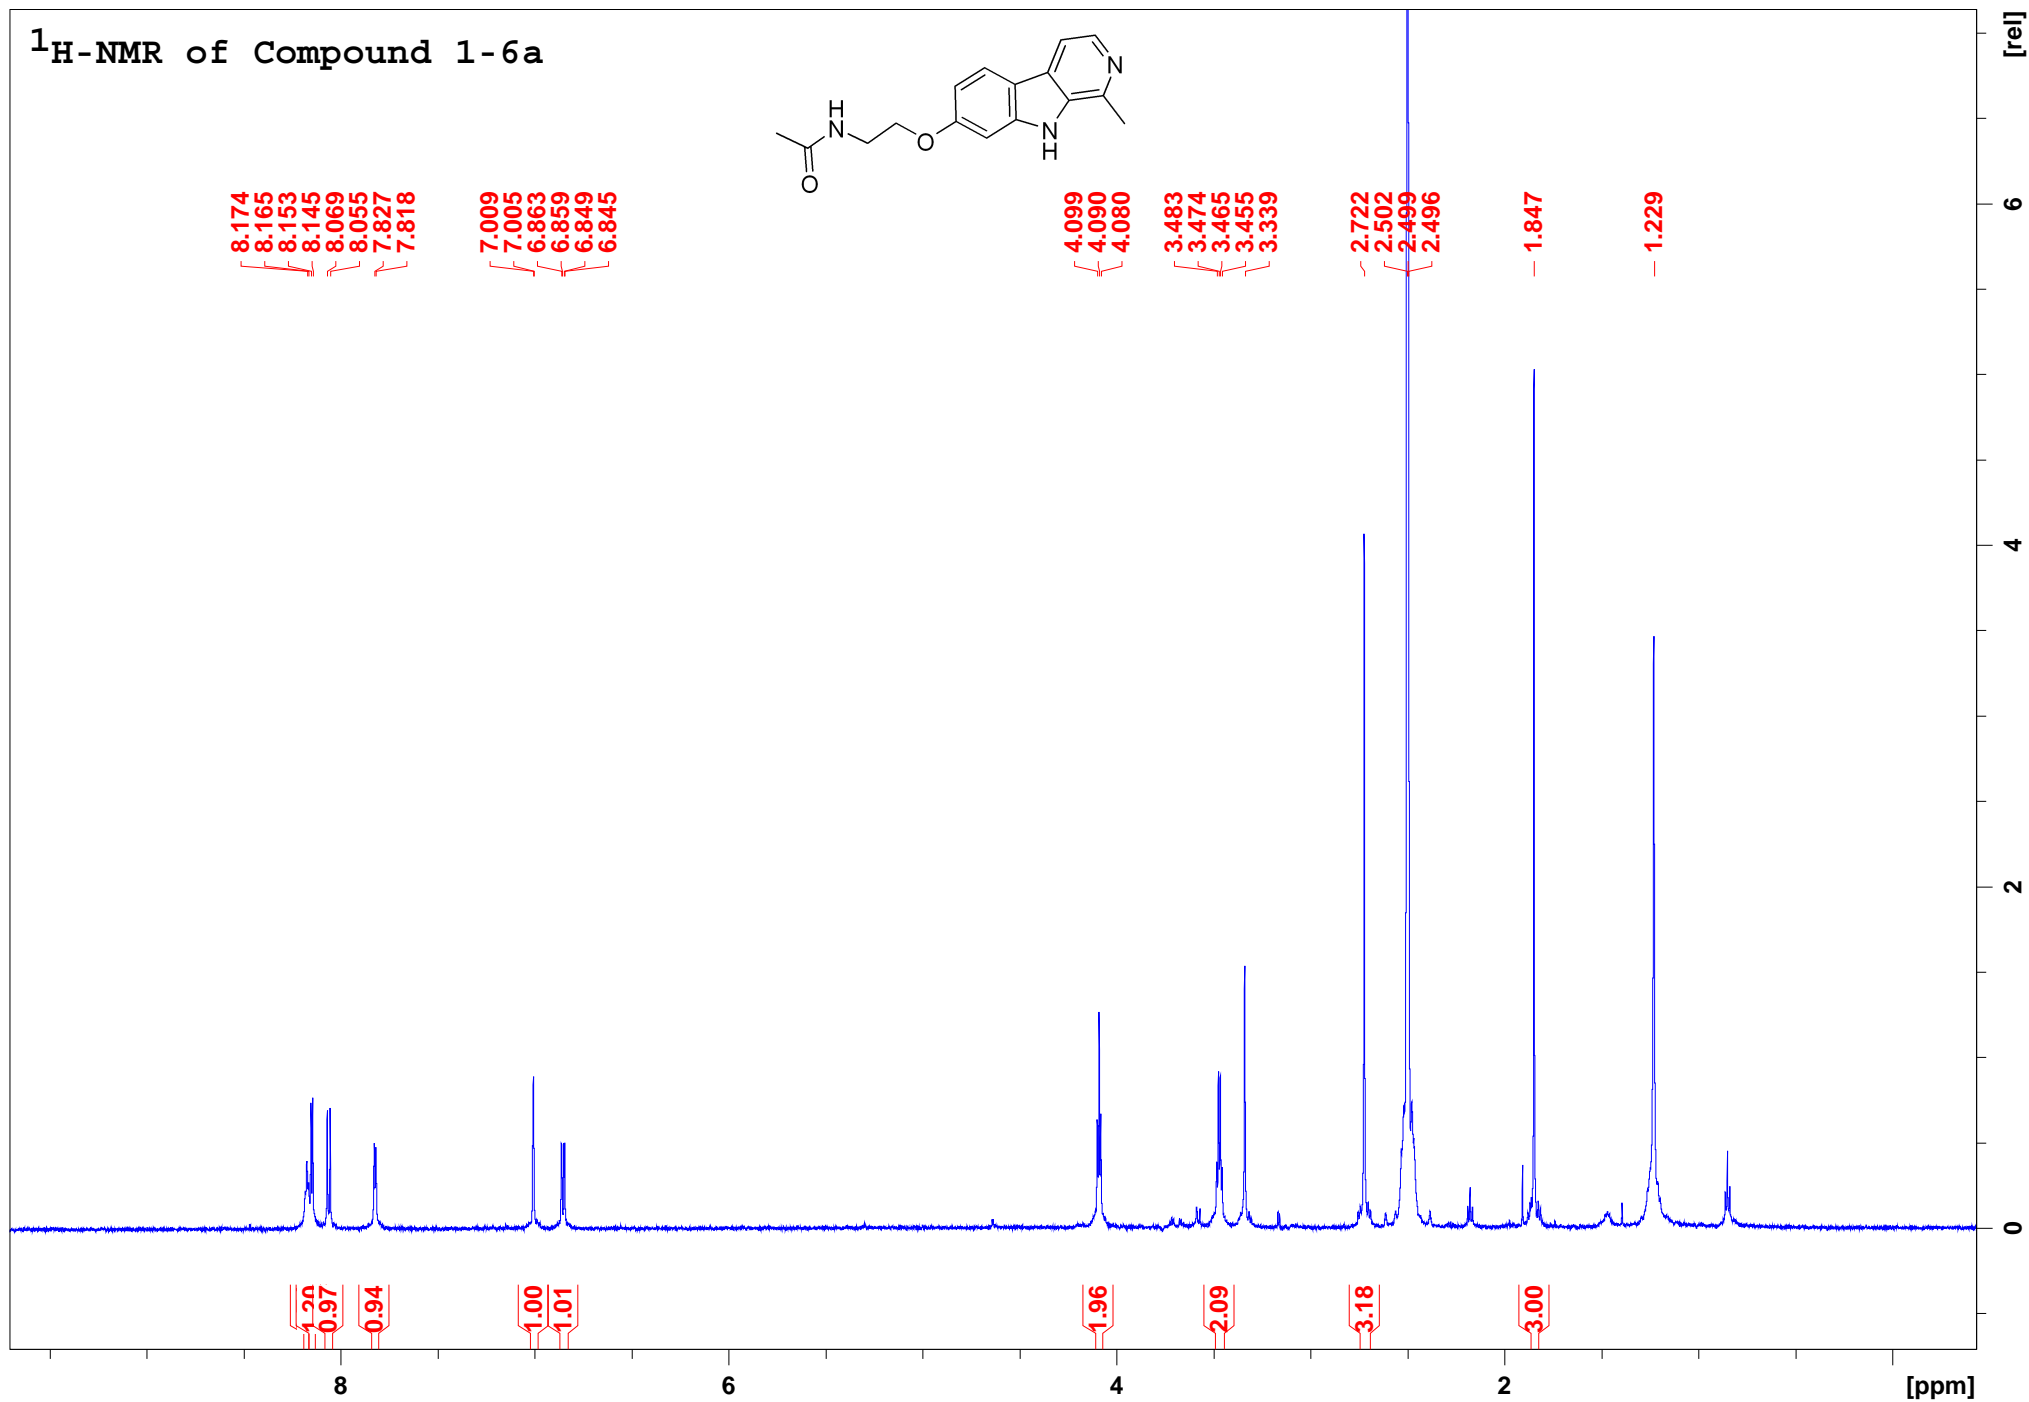



<sup>1</sup>H-NMR of Compound 1-6b

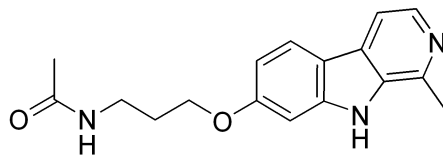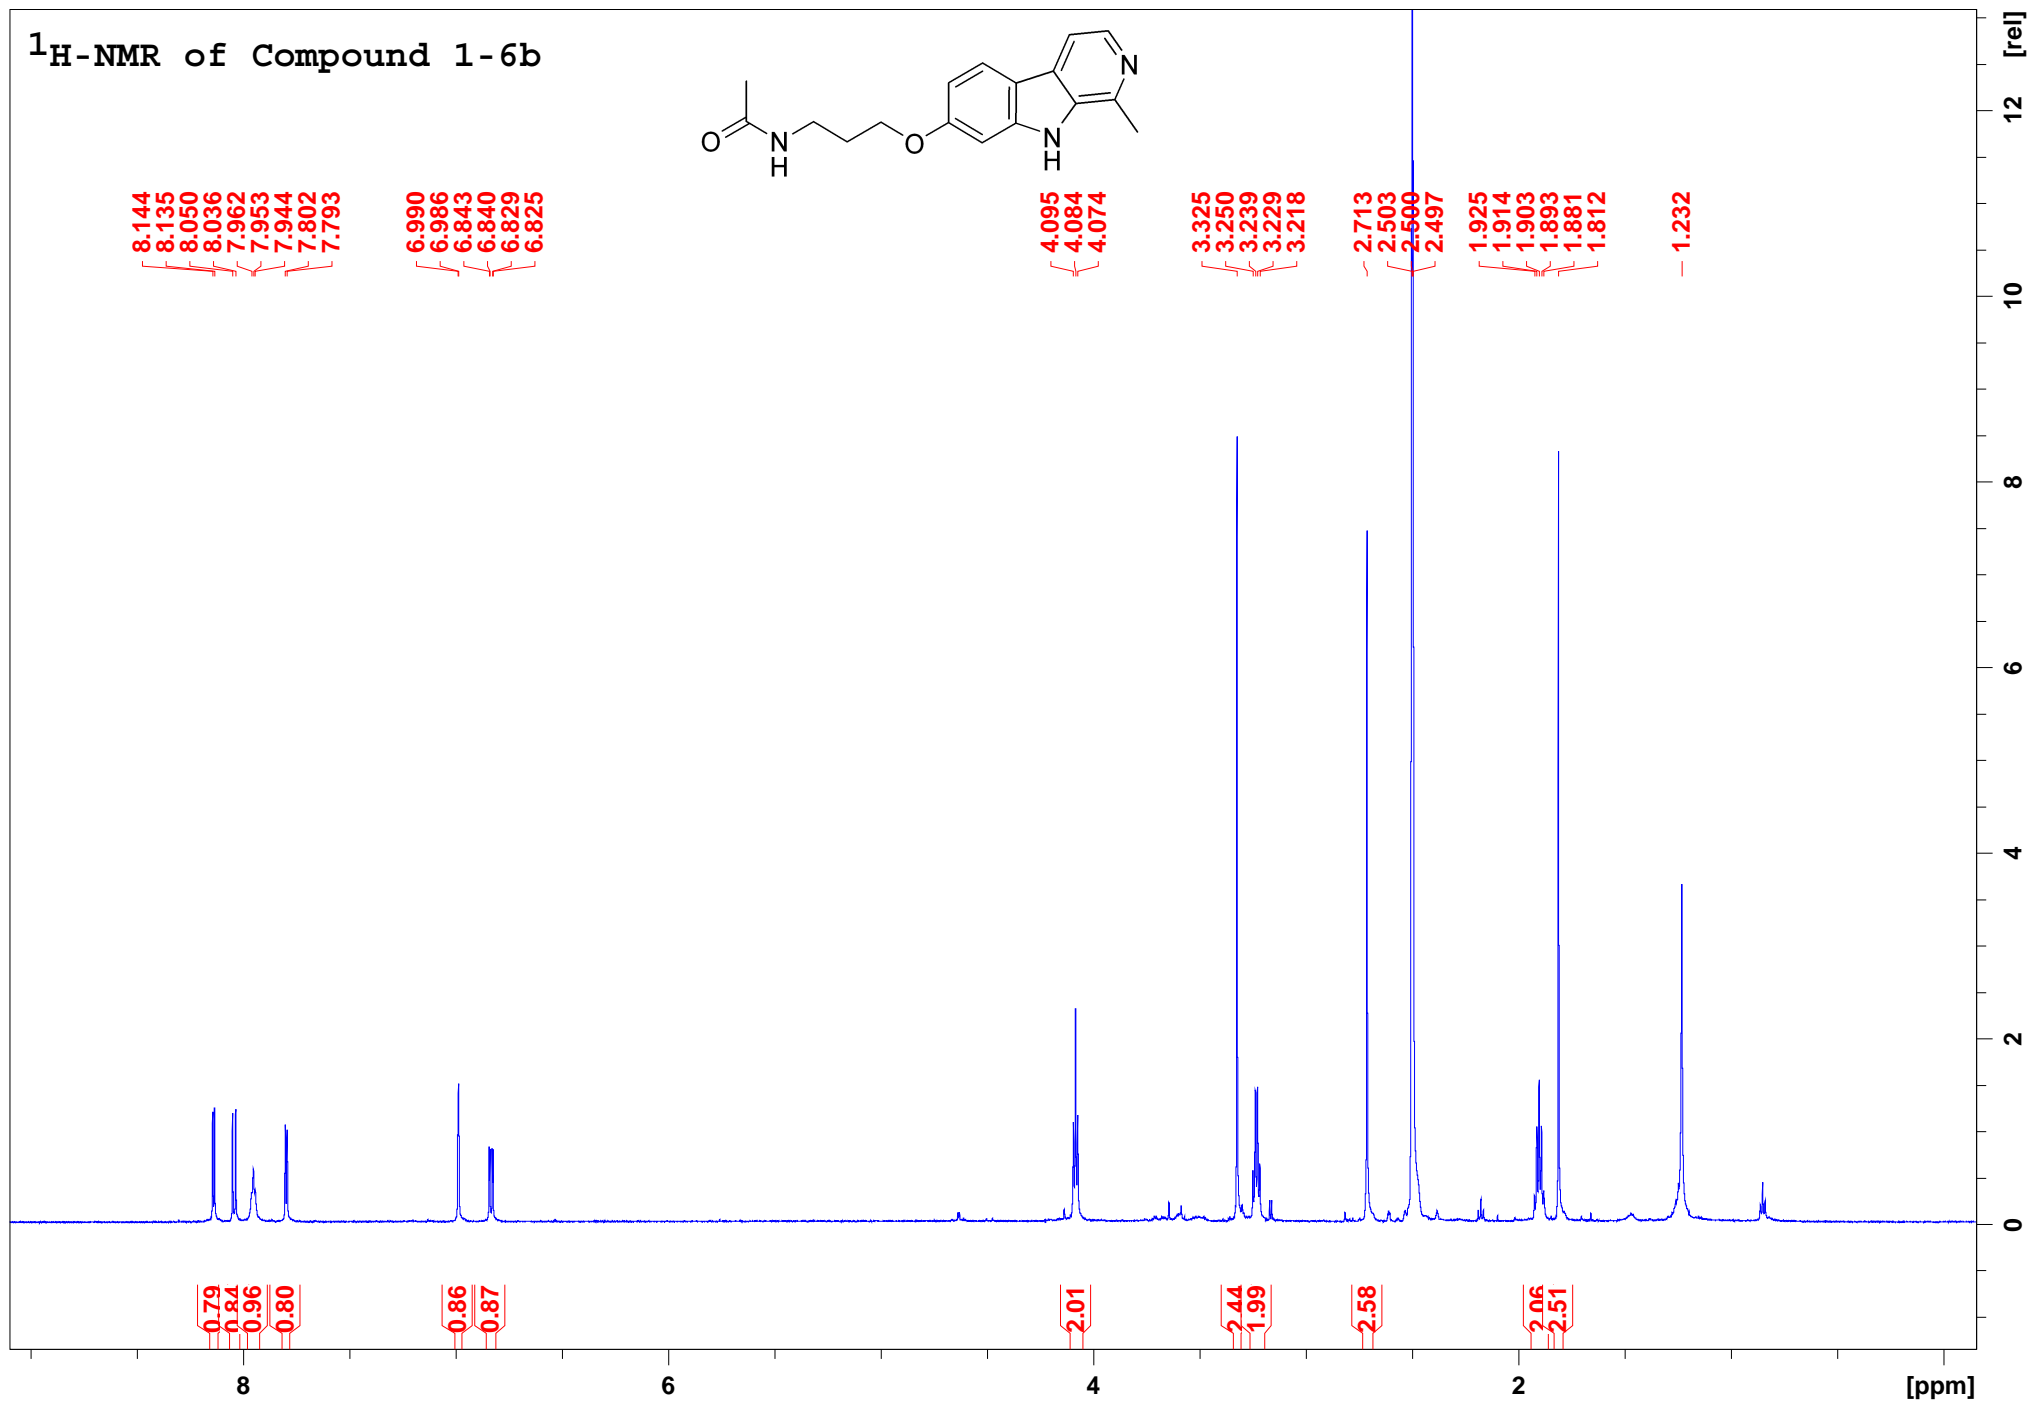

<sup>1</sup>H-NMR of Compound 1-6c

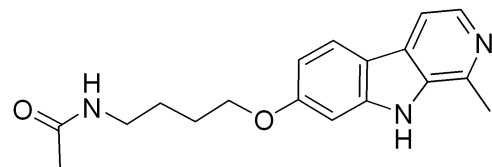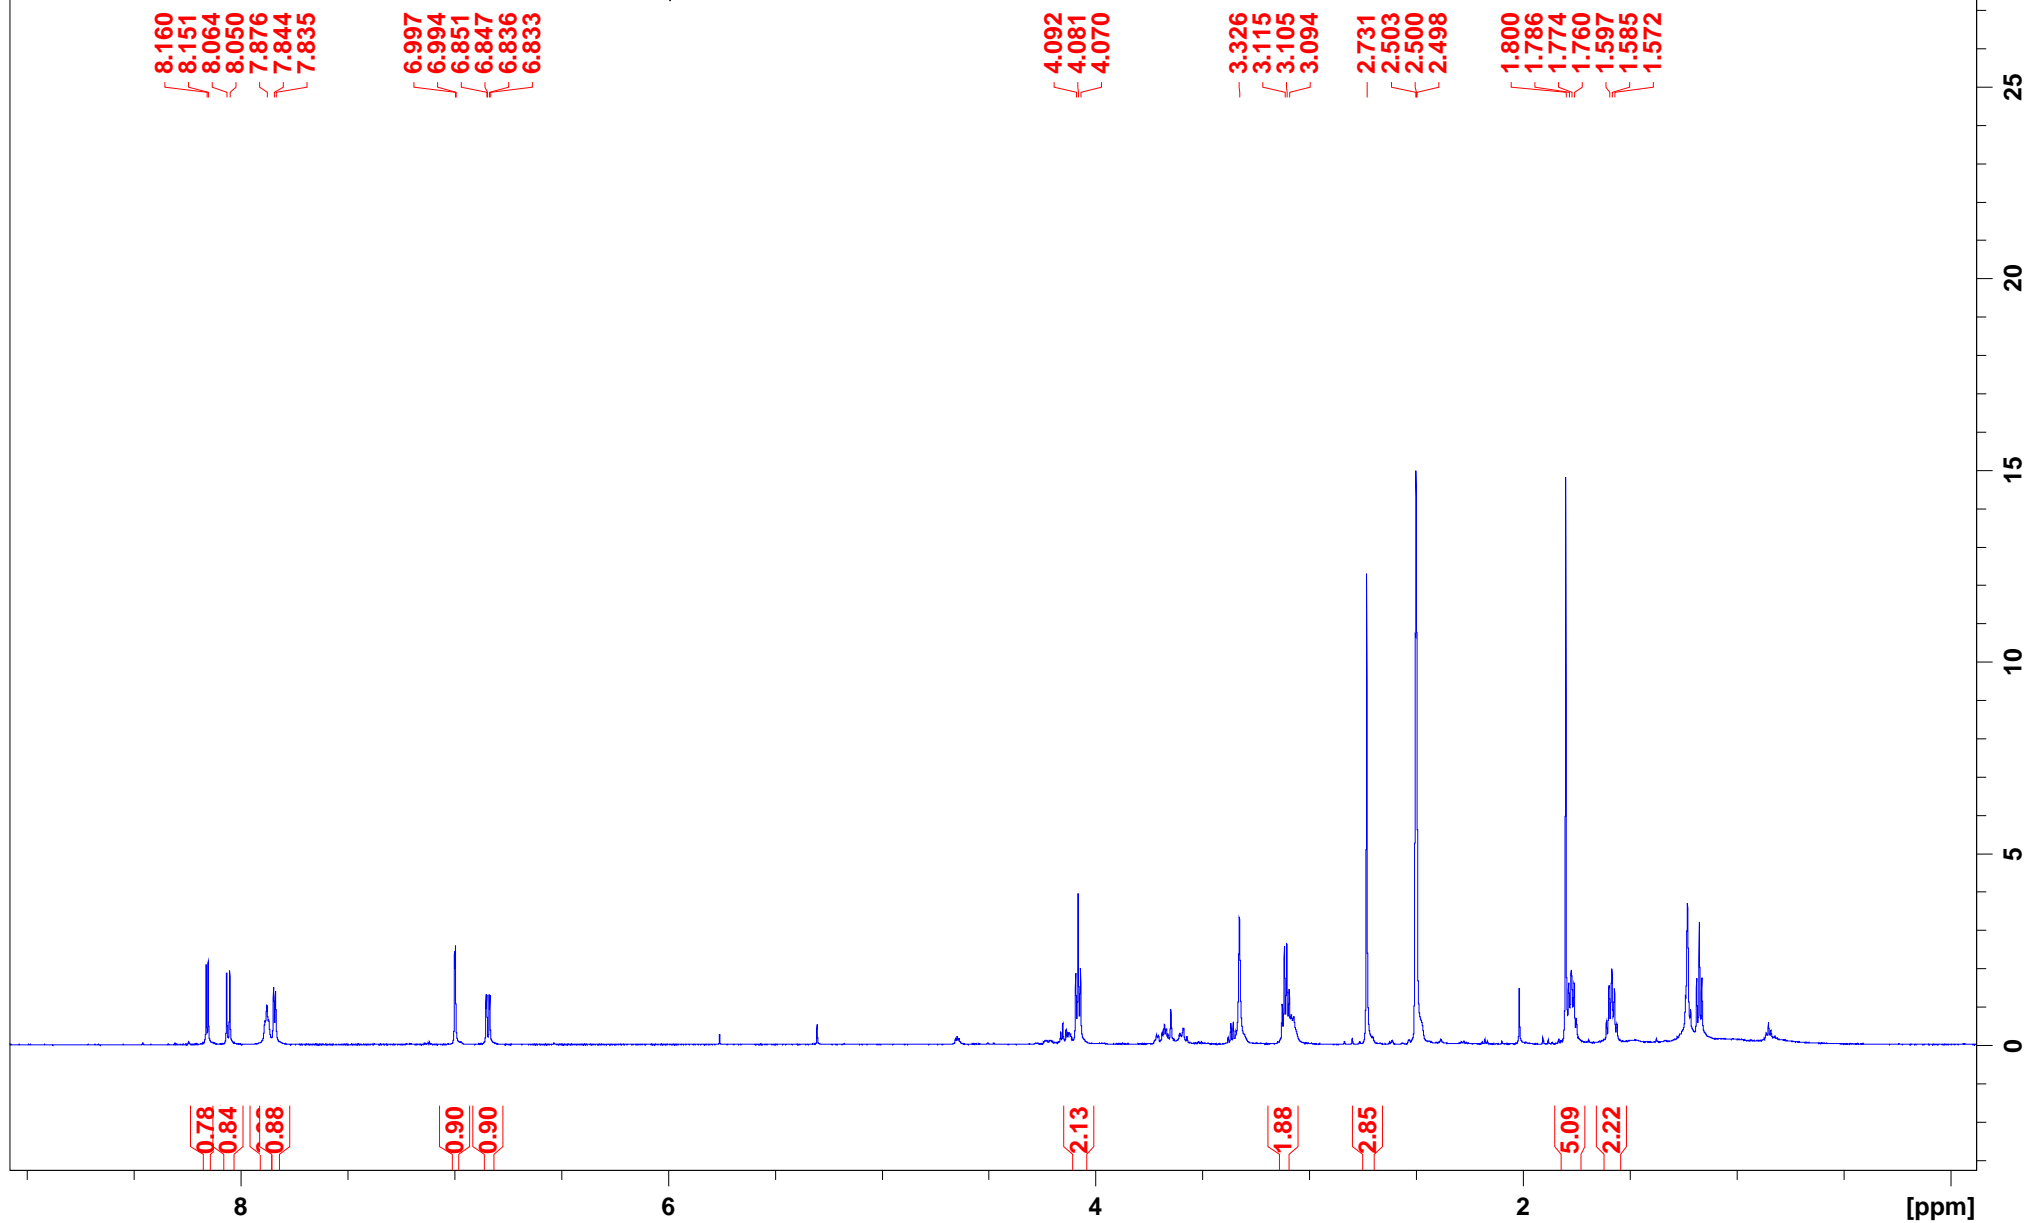

<sup>1</sup>H-NMR of Compound 1-6d

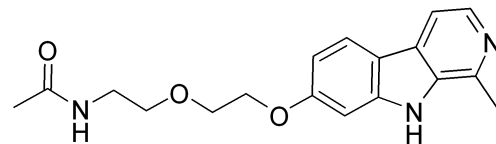

8.147  
8.138  
8.055  
8.040  
7.939  
7.804  
7.796

7.011  
7.007  
6.860  
6.857  
6.846  
6.842

4.209  
4.202  
4.194  
3.804  
3.796  
3.789  
3.514  
3.505  
3.495  
3.333  
3.247  
3.237  
3.228  
3.218  
2.716  
2.503  
2.500  
2.498

1.798

0.75  
0.83  
0.91  
0.80

0.91  
0.87

2.10

2.07

2.12

2.16

2.88

2.71

[ppm]

20 [rel]

15

10

5

0

<sup>1</sup>H-NMR of Compound 1-7

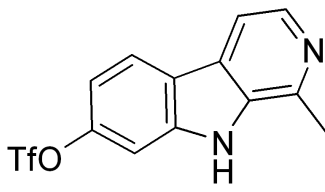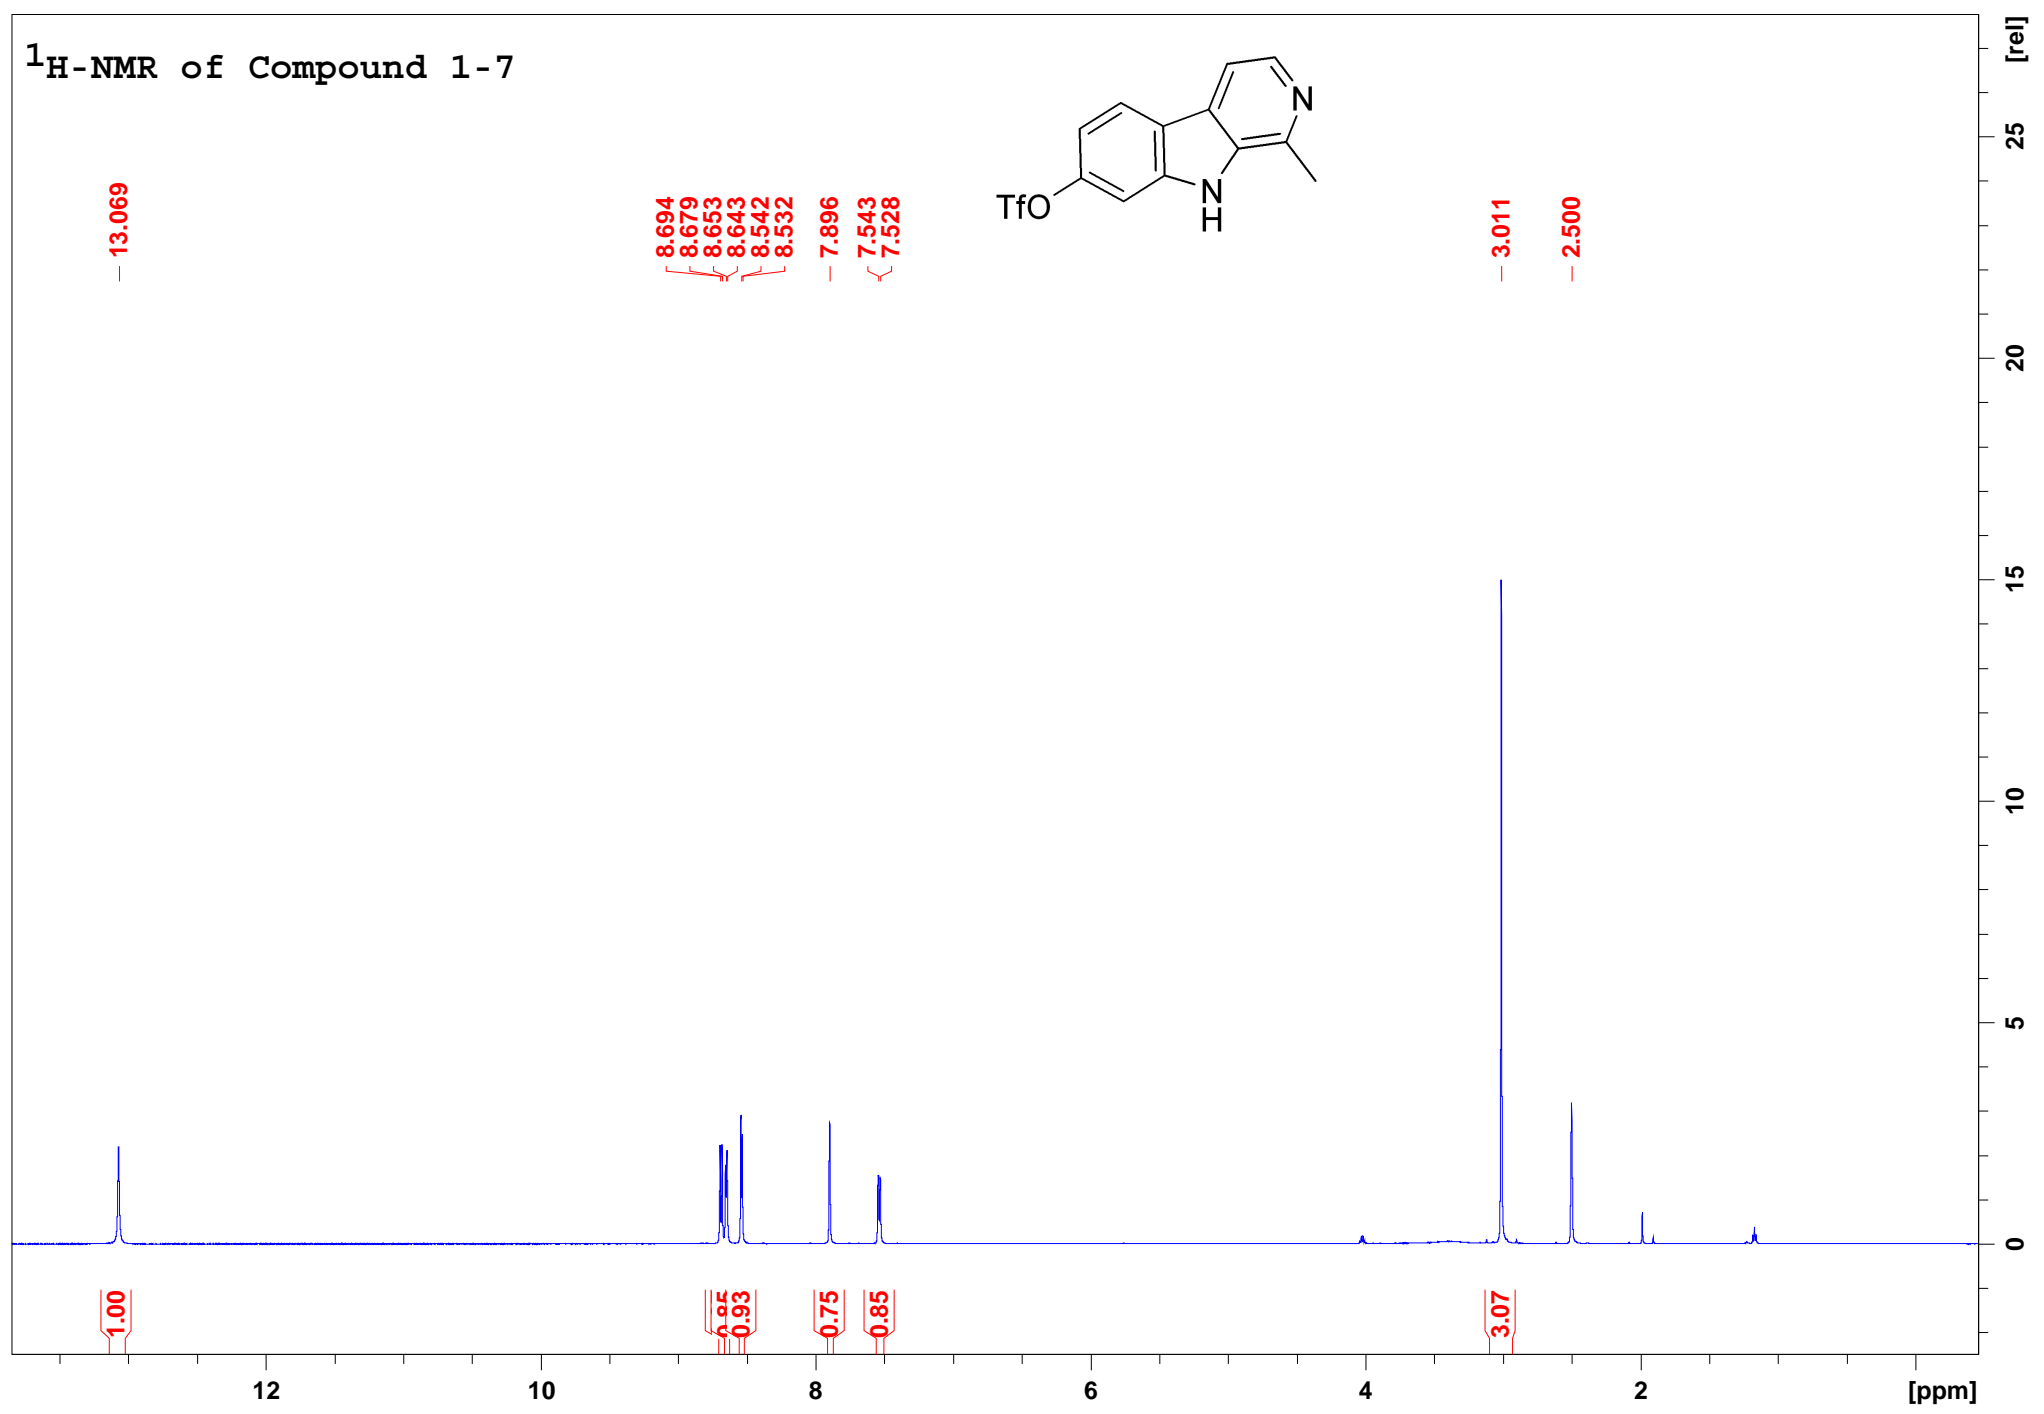

<sup>1</sup>H-NMR of Compound 1-8

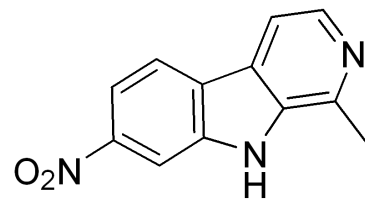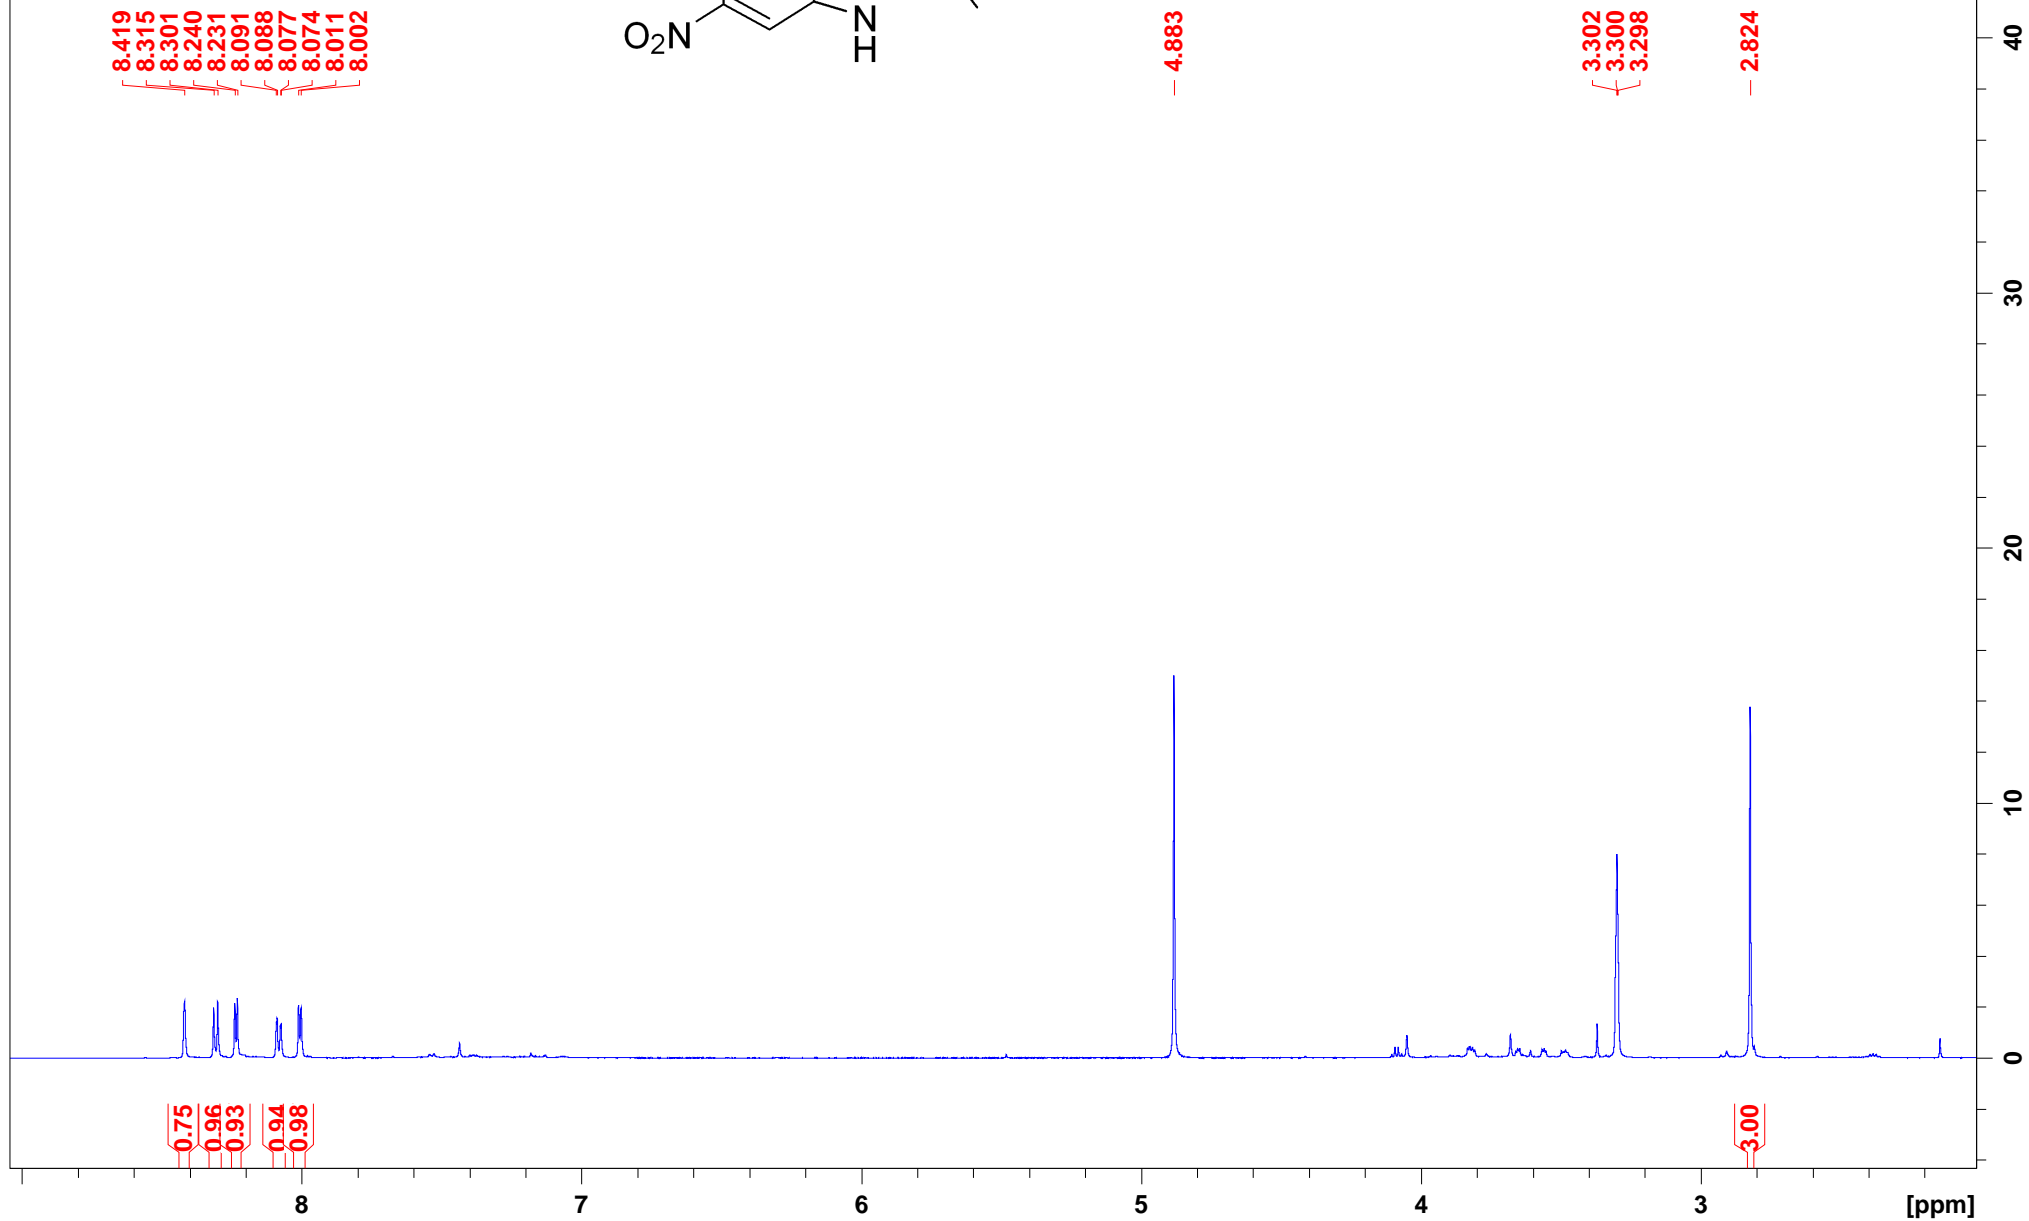

<sup>1</sup>H-NMR of Compound 1-9

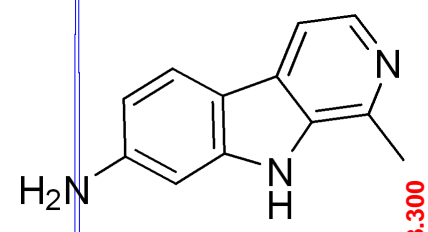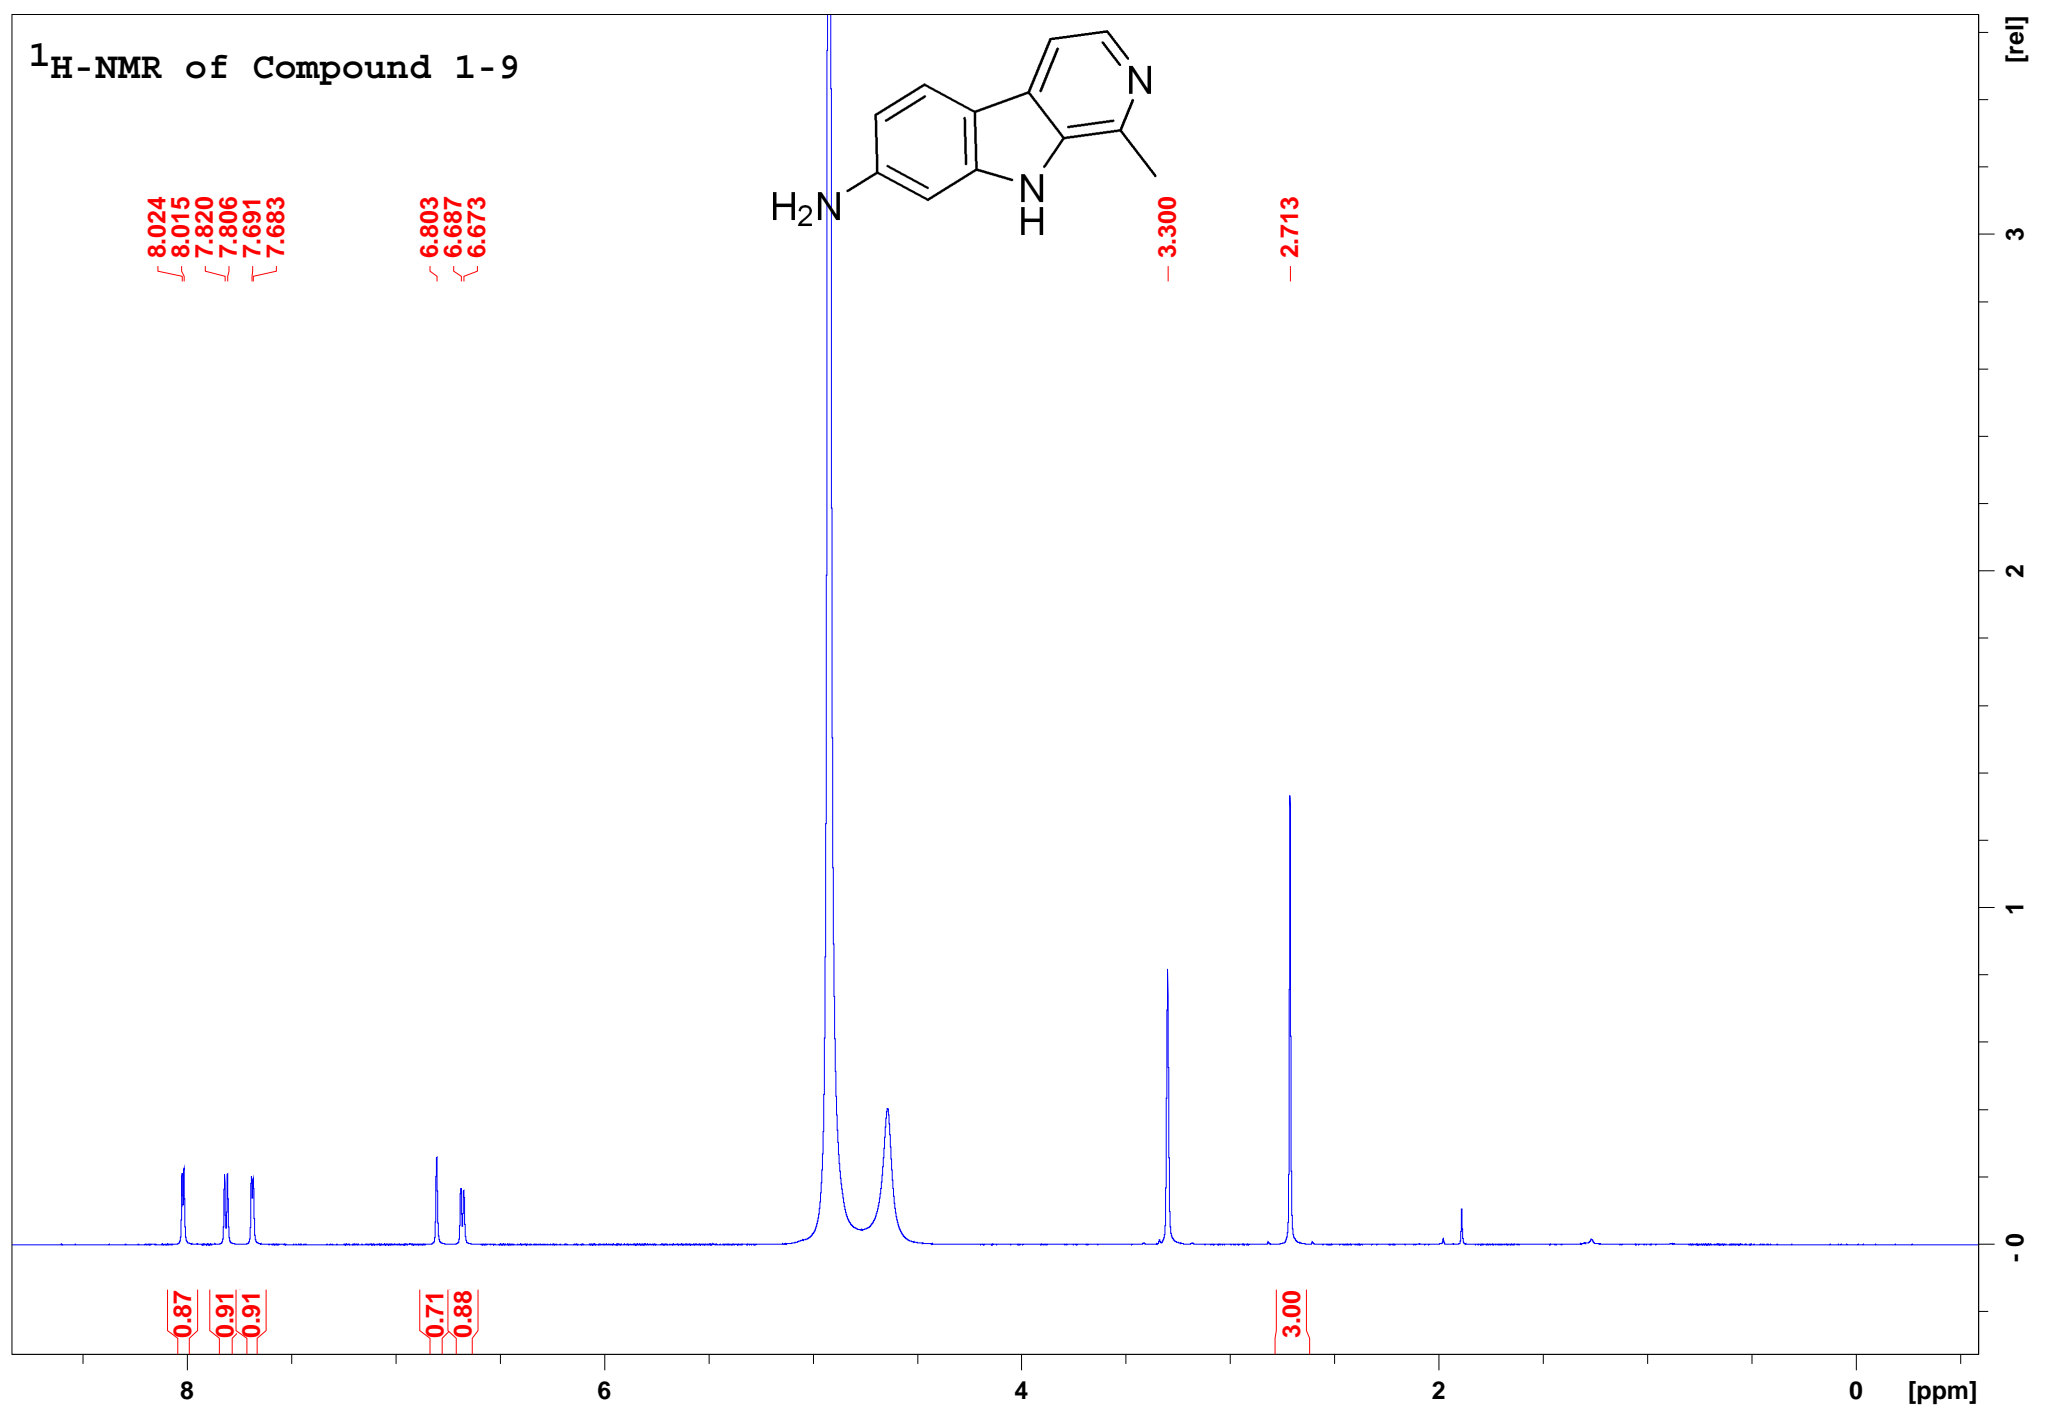

<sup>1</sup>H-NMR of Compound 1-10

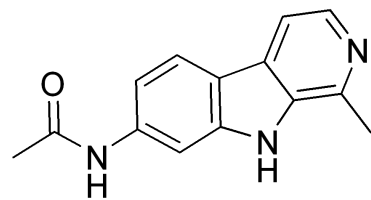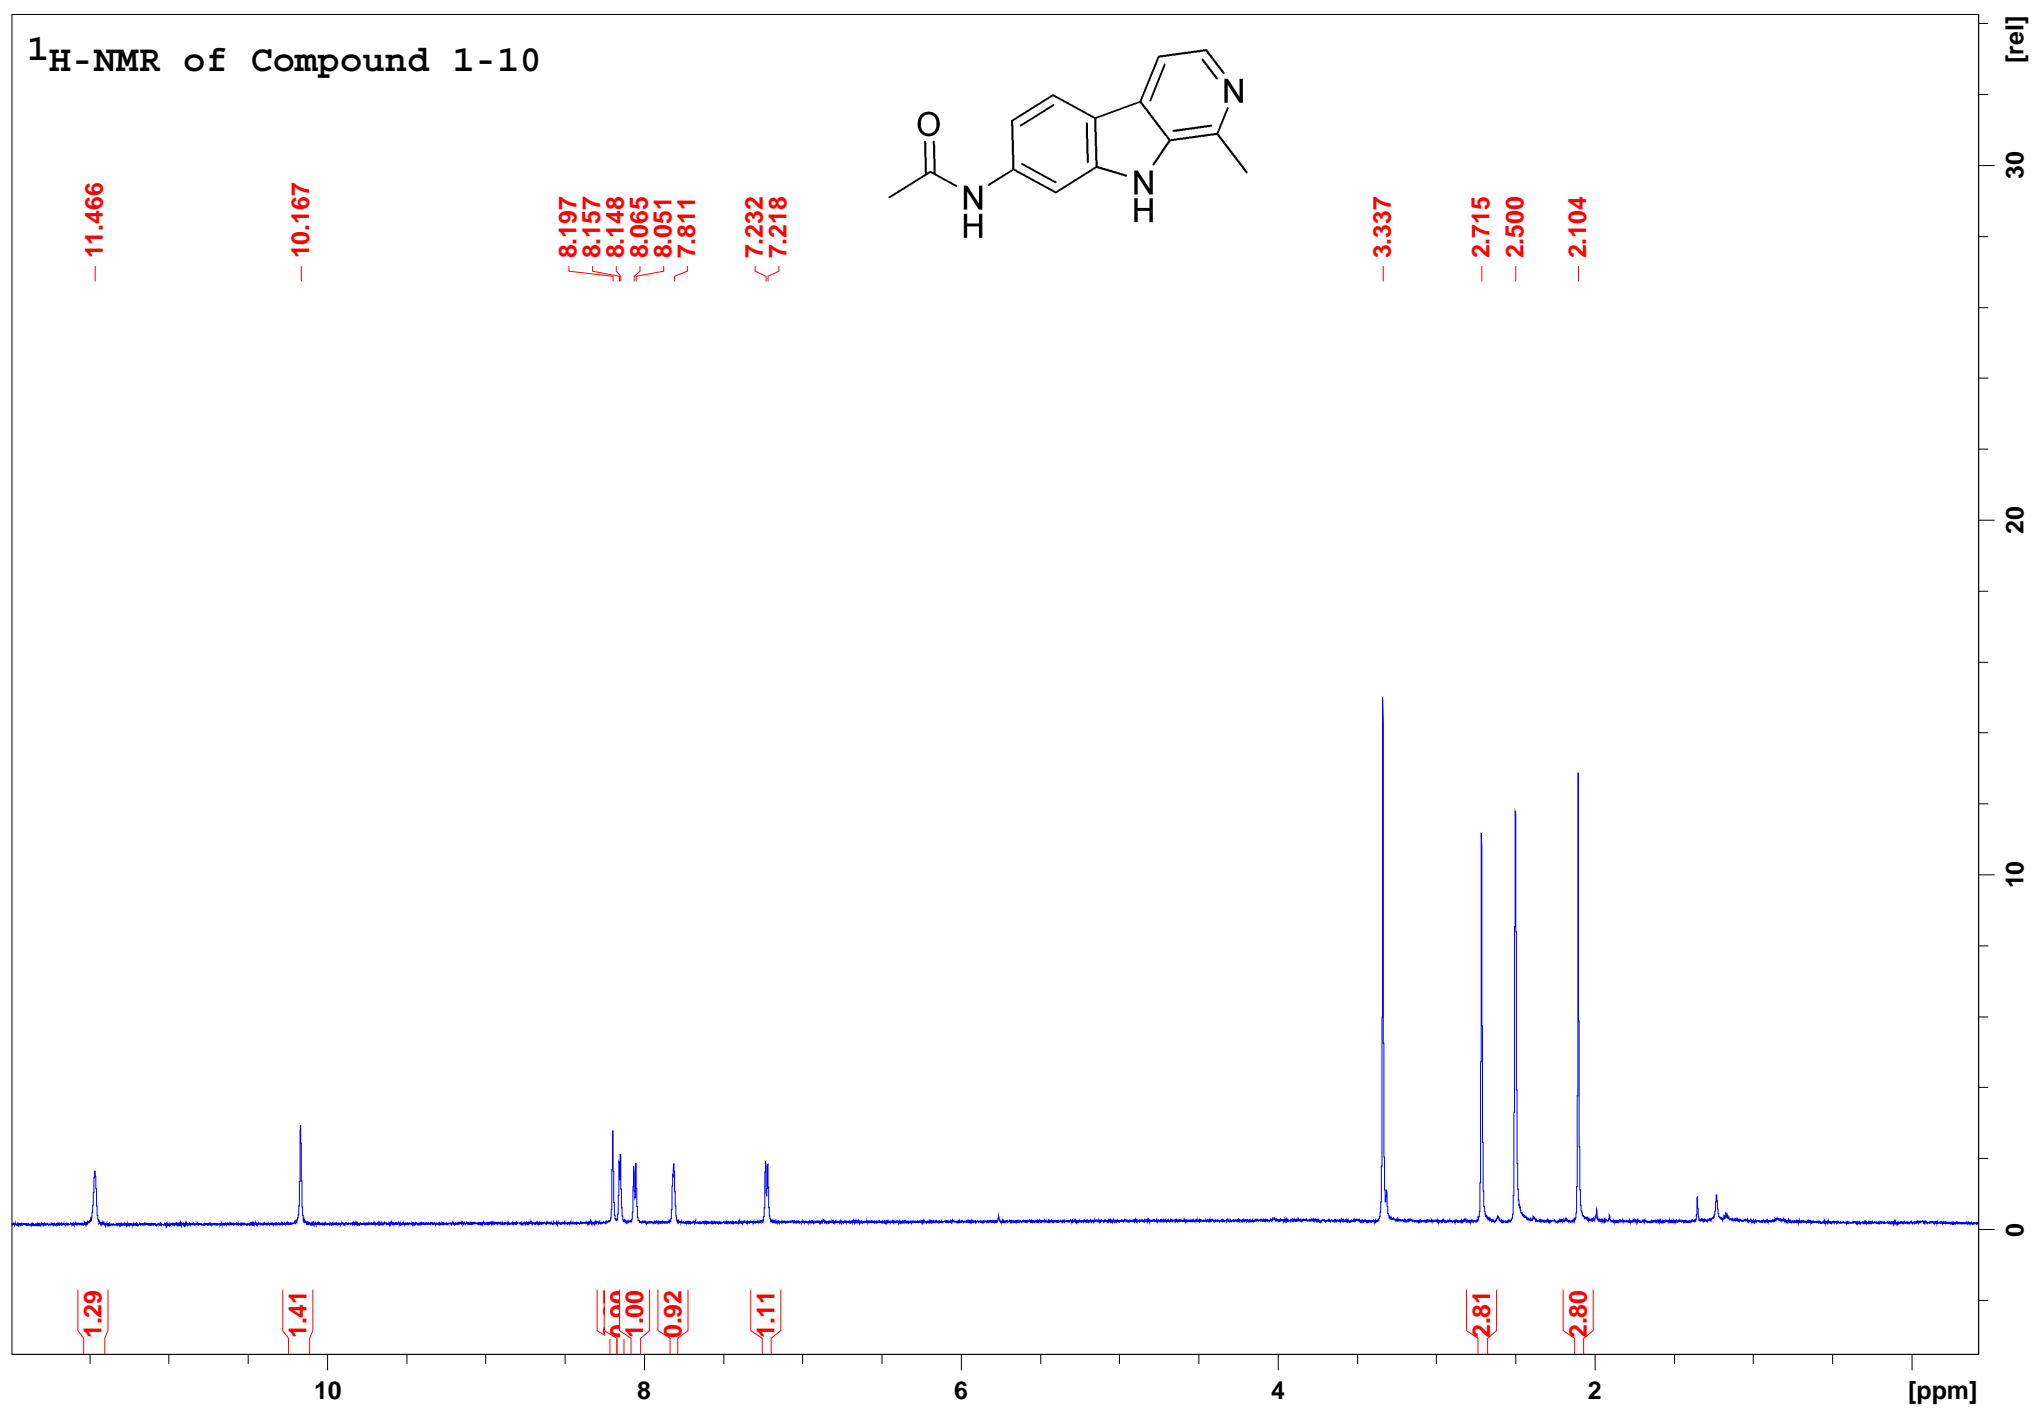

<sup>1</sup>H-NMR of Compound 1-11

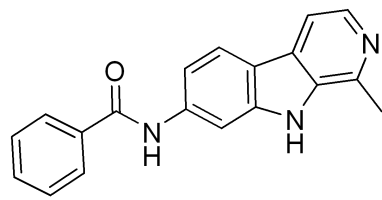

8.134  
8.120  
8.005  
7.993  
7.852  
7.843  
7.617  
7.604  
7.573  
7.561  
7.556  
7.552  
7.549  
7.541  
7.539

— 3.338

— 2.742

— 2.500

0.82  
0.91  
0.91  
1.81  
0.88  
0.97  
2.73

3.00

[rel]

60

40

20

0

8

6

4

2

[ppm]



<sup>1</sup>H-NMR of Compound 1-12

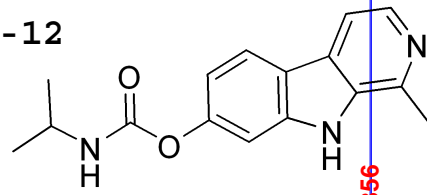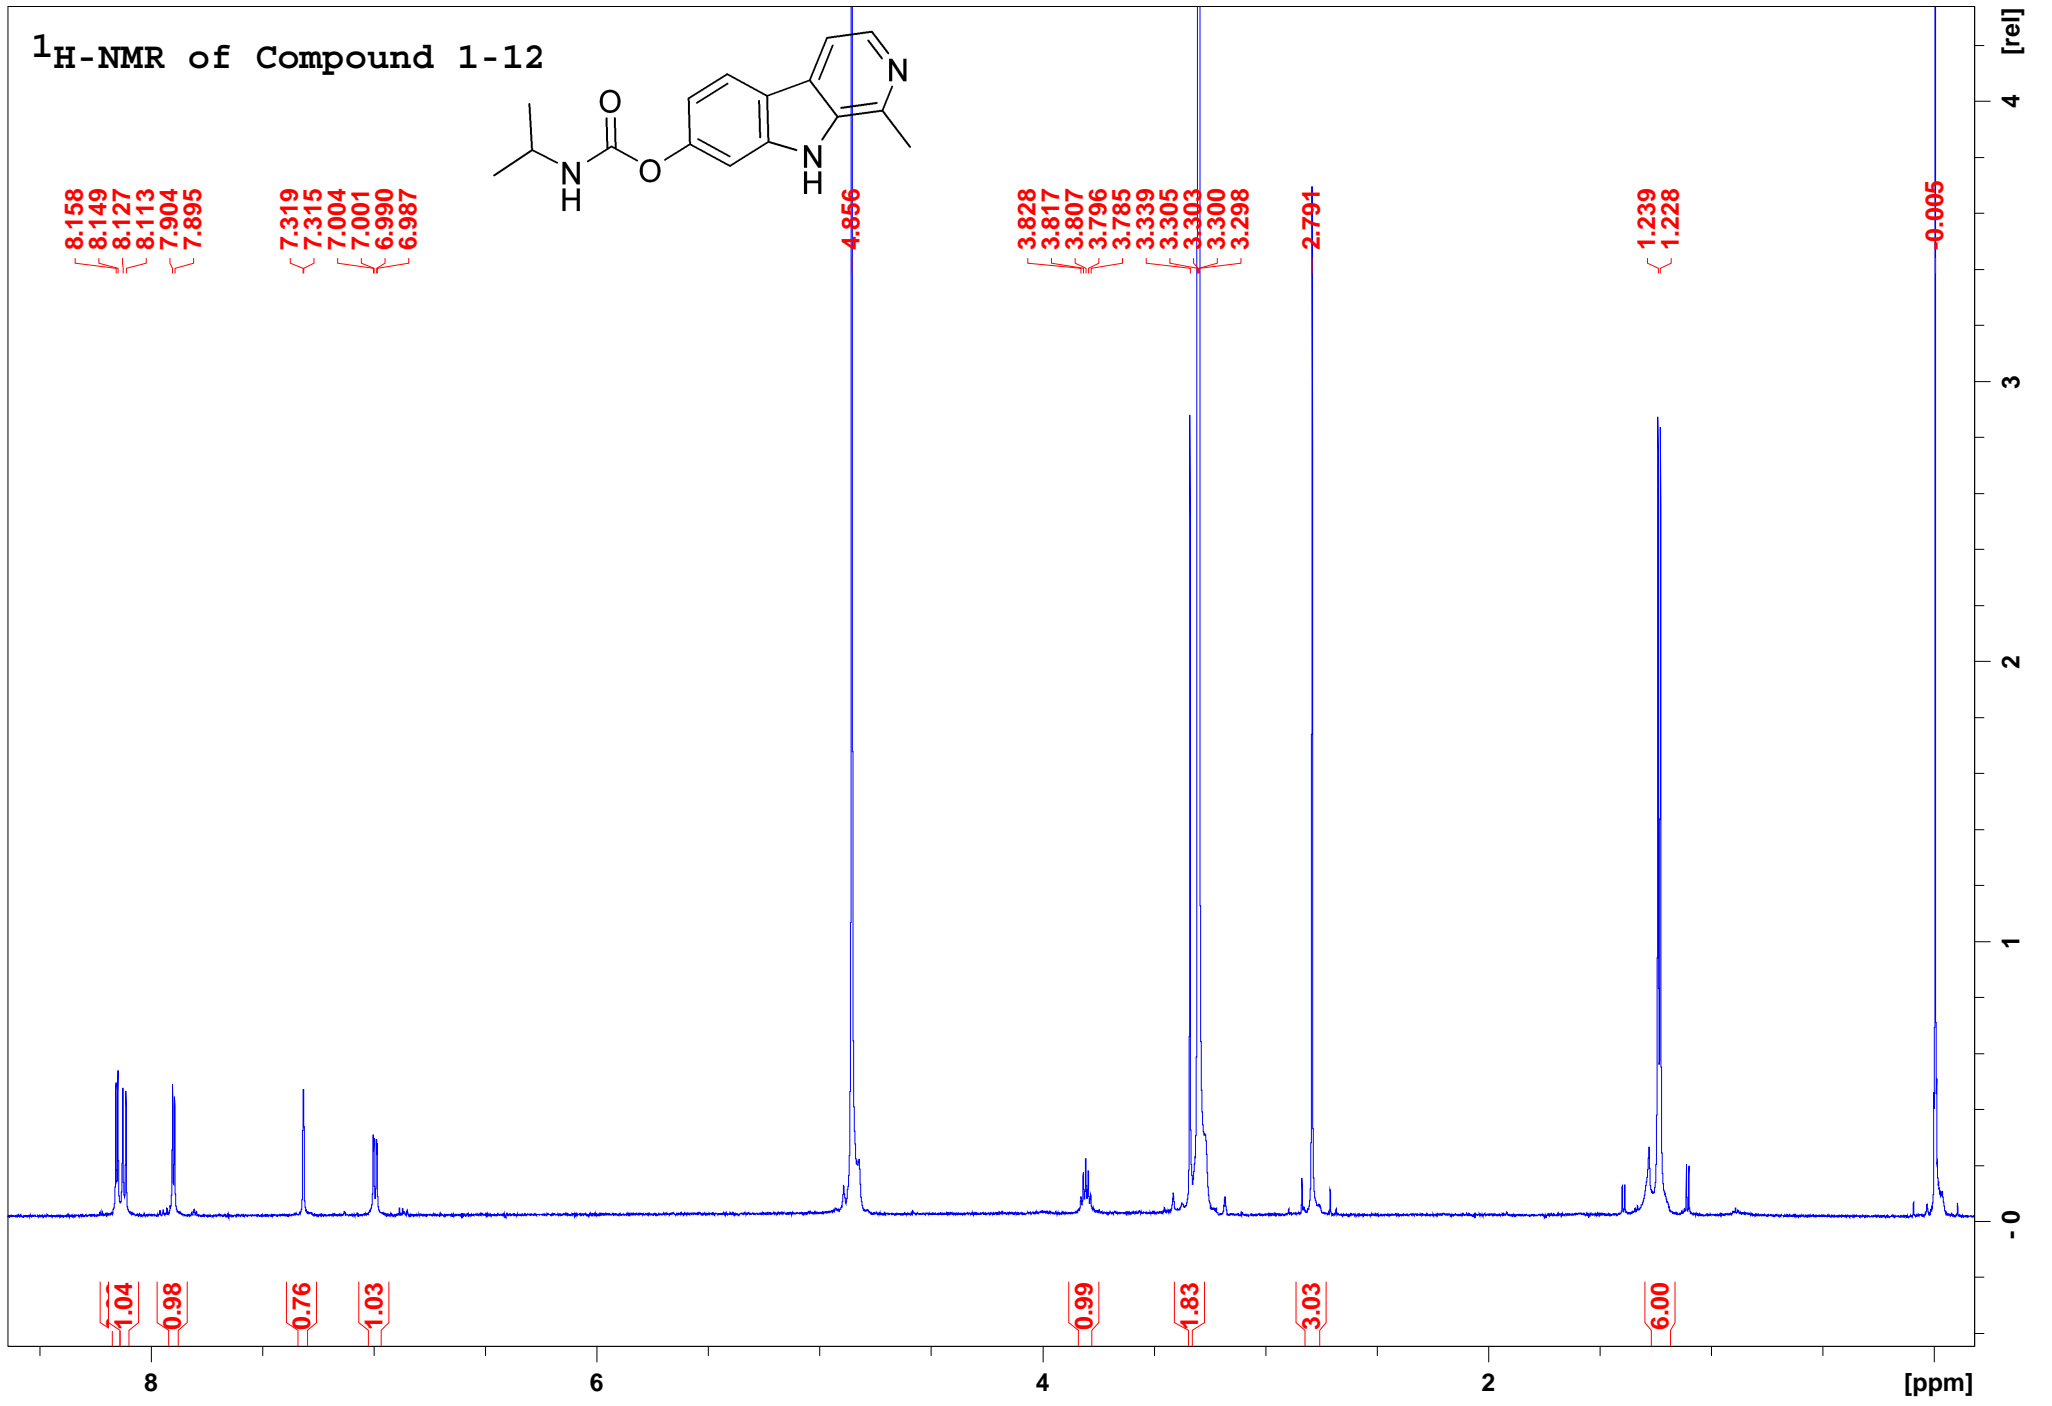

Supplement: molecules-25-01983-s001.pdf [file molecules-25-01983-s001.pdf]
